# Supplementary material for: Global diversity of policy, coverage, and demand of COVID-19 vaccines: a descriptive study
Source: bioRxiv or medRxiv preprint supplement (doi:10.1101/2021.10.25.21265504), 2021-10-26
Supplement: Supplementary file [file media-1.pdf]

## Appendix

### **Global diversity of policy, coverage, and demand of COVID-19 vaccines: a descriptive study**

Zhiyuan Chen<sup>1†</sup>, Wen Zheng<sup>1†</sup>, Qianhui Wu<sup>1†</sup>, Xinghui Chen<sup>1†</sup>, Cheng Peng<sup>1†</sup>, Yuyang Tian<sup>1</sup>, Ruijia Sun<sup>1</sup>, Minghan Wang<sup>1</sup>, Xiaoyu Zhou<sup>1</sup>, Zeyao Zhao<sup>1</sup>, Guangjie Zhong<sup>1</sup>, Xuemei Yan<sup>1</sup>, Nuolan Liu<sup>1</sup>, Feiran Hao<sup>1</sup>, Sihong Zhao<sup>1</sup>, Tingyu Zhuang<sup>1</sup>, Juan Yang<sup>1,2</sup>, Andrew S. Azman<sup>3,4</sup>, Hongjie Yu<sup>1,2,5</sup>

#### Author Affiliations:

1. School of Public Health, Fudan University, Key Laboratory of Public Health Safety, Ministry of Education, Shanghai, China
2. Shanghai Institute of Infectious Disease and Biosecurity, Fudan University, Shanghai, China
3. Department of Epidemiology, Johns Hopkins Bloomberg School of Public Health, Baltimore, MD, USA
4. Institute of Global Health, Faculty of Medicine, University of Geneva, Switzerland
5. Department of Infectious Diseases, Huashan Hospital, Fudan University, Shanghai, China

†These authors contributed equally to this work.

Corresponding authors: Hongjie Yu, School of Public Health, Fudan University, Shanghai 200032, China; E-mail: [yhj@fudan.edu.cn](mailto:yhj@fudan.edu.cn)

## Contents

|                                                                                                                           |    |
|---------------------------------------------------------------------------------------------------------------------------|----|
| COVID-19 vaccination policy.....                                                                                          | 3  |
| <i>Metrics included in the dataset of COVID-19 vaccination policy</i> .....                                               | 3  |
| Table S1. Authorization information of COVID-19 vaccines by technical platforms and country.....                          | 4  |
| Table S2. Self-payment Fee , target population, and contraindications recommended by regulatory agencies.....             | 11 |
| Table S3. Recommendation on the use of an additional or booster dose of COVID-19 vaccine.....                             | 38 |
| Table S4. Country lists of selling/donating or receiving COVID-19 vaccines.....                                           | 54 |
| Target population for primary vaccination.....                                                                            | 55 |
| <i>Method to estimate the size of target population</i> .....                                                             | 55 |
| Table S5. Categories and definitions of special population groups belonging to indication and contraindication lists..... | 56 |
| Table S6. Global, regional, and national target population.....                                                           | 73 |
| COVID-19 vaccine coverage.....                                                                                            | 79 |
| <i>Metrics included in the dataset of administered doses</i> .....                                                        | 79 |
| Figure S1. Proportion administered by vaccine technical platforms.....                                                    | 80 |
| Figure S2. Proportion administered by vaccine types.....                                                                  | 81 |
| Figure S3. Date at which achieved one dose per 100 people in total population by countries.....                           | 82 |
| Figure S4. Vaccine coverage over time stratified by income groups and role of vaccine seller/donor or recipient.....      | 83 |
| Figure S5. Vaccine coverage stratified by SDI quintile and WHO region.....                                                | 84 |
| Figure S6. Corrections between vaccine coverage and country-level vaccine acceptance.....                                 | 85 |
| Demand of COVID-19 vaccine doses.....                                                                                     | 86 |
| <i>Method to calculate the demand of COVID-19 vaccine doses</i> .....                                                     | 86 |
| Table S7. Global, regional, and national demand of vaccine dose.....                                                      | 87 |
| References.....                                                                                                           | 98 |

## **COVID-19 vaccination policy**

### ***Metrics included in the dataset of COVID-19 vaccination policy***

- (1) **Authorization status.** Status includes licensure in use, emergency use authorization, conditional marketing, special access route, and recipients of COVAX or other countries.
- (2) **Indications and contraindications.** People who could and should not get vaccinated against COVID-19, recommended by governments/health departments.
- (3) **Additional/booster dose policy.** If the government/health department gives a clear definition of an additional/booster dose, we adopted it. Otherwise, we used the definition by the United States Centers for Disease Control and Prevention<sup>1</sup>.
  - 3.1 **Target population.** Individuals who are eligible for a COVID-19 vaccine additional/booster shot.
  - 3.2 **Interval.** The time between the completion of primary immunization and additional/booster shots.
- (5) **Whether provide at no cost to individual vaccine recipients.**

**Table S1. Authorization information of COVID-19 vaccines by technical platforms and country.**

| Vaccine                            | Authorization status                                | Use status           | Country lists                                                                                                                                                                                                                                                                                                                                                                                               |
|------------------------------------|-----------------------------------------------------|----------------------|-------------------------------------------------------------------------------------------------------------------------------------------------------------------------------------------------------------------------------------------------------------------------------------------------------------------------------------------------------------------------------------------------------------|
| <b>Adenovirus vectored vaccine</b> |                                                     |                      |                                                                                                                                                                                                                                                                                                                                                                                                             |
| 1. Convidecia                      | Conditional marketing                               | In use               | China                                                                                                                                                                                                                                                                                                                                                                                                       |
|                                    | Emergency Use Authorization                         | In use               | Argentina, Chile, Ecuador, Indonesia, Malaysia, Mexico, Pakistan                                                                                                                                                                                                                                                                                                                                            |
| 2. Covishield                      | Conditional marketing                               | Currently not in use | Canada                                                                                                                                                                                                                                                                                                                                                                                                      |
|                                    | Emergency Use Authorization                         | In use               | Argentina, Bahrain, Bangladesh, Barbados, Bhutan, Botswana, Brazil, Cambodia, Cameroon, Comoros, Dominica, Egypt, Ghana, India, Iran, Laos, Madagascar, Maldives, Mauritius, Mexico, Morocco, Nepal, Nicaragua, Nigeria, Nigeria, Oman, Moldova, Saint Vincent and the Grenadines, Seychelles, South Africa, South Korea, Sri Lanka, Ukraine, Ukraine, Uzbekistan                                           |
|                                    | Recipients of COVAX or other countries              | In use               | Afghanistan, Angola, Ethiopia, Grenada, Guinea, Lesotho, Liberia, Malawi, Mali, Mauritania, Papua New Guinea, Saint Kitts and Nevis, Somalia, Suriname, Syria, Togo, Uganda, Yemen, Zambia, Trinidad and Tobago                                                                                                                                                                                             |
| 3. Janssen COVID-19 Vaccine        | Conditional marketing / Emergency Use Authorization | Currently not in use | Denmark, Finland, Norway, Sweden, India                                                                                                                                                                                                                                                                                                                                                                     |
|                                    | Conditional marketing                               | In use               | Austria, Bulgaria, Canada, Croatia, Cyprus, Czechia, Estonia, France, Germany, Greece, Iceland, Ireland, Italy, Latvia, Lithuania, Luxembourg, Malta, Netherlands, Romania, Slovakia, Slovenia, Spain                                                                                                                                                                                                       |
|                                    | Emergency Use Authorization                         | In use               | Antigua and Barbuda, Bahamas, Bahrain, Bangladesh, Belgium, Belize, Bolivia, Botswana, Brazil, Cameroon, Chile, Colombia, Comoros, Cote d'Ivoire, Egypt, Ghana, Guinea, Hungary, Indonesia, Kenya, Kuwait, Laos, Lesotho, Libya, Madagascar, Malaysia, Marshall Islands, Mexico, Micronesia, Namibia, Nigeria, Oman, Philippines, Poland, Portugal, Rwanda, Saint Vincent and the Grenadines, Saudi Arabia, |

|                  |                                        |                      |                                                                                                                                                                                                                                                                                                                                                                                                                                                                                                                                                                                                             |
|------------------|----------------------------------------|----------------------|-------------------------------------------------------------------------------------------------------------------------------------------------------------------------------------------------------------------------------------------------------------------------------------------------------------------------------------------------------------------------------------------------------------------------------------------------------------------------------------------------------------------------------------------------------------------------------------------------------------|
|                  |                                        |                      | South Africa, South Korea, Sudan, Switzerland, Thailand, Togo, Tunisia, United Kingdom, United States, Vietnam, Zambia, Zimbabwe, Trinidad and Tobago                                                                                                                                                                                                                                                                                                                                                                                                                                                       |
|                  | Recipients of COVAX or other countries | In use               | Afghanistan, Algeria, Benin, Central African Republic, Djibouti, Ethiopia, Gambia, Liberia, Malawi, Mali, Mauritania, Nepal, Palau, Papua New Guinea, Senegal, Sierra Leone, Somalia, South Sudan, Tajikistan, Tanzania, Yemen                                                                                                                                                                                                                                                                                                                                                                              |
| 4. Sputnik Light | Emergency Use Authorization            | In use               | Belarus, Mongolia, Venezuela                                                                                                                                                                                                                                                                                                                                                                                                                                                                                                                                                                                |
|                  | Licensure                              | In use               | Russia                                                                                                                                                                                                                                                                                                                                                                                                                                                                                                                                                                                                      |
| 5. Sputnik V     | Emergency Use Authorization            | Currently not in use | Maldives                                                                                                                                                                                                                                                                                                                                                                                                                                                                                                                                                                                                    |
|                  | Emergency Use Authorization            | In use               | Albania, Algeria, Antigua and Barbuda, Argentina, Armenia, Azerbaijan, Bahrain, Bangladesh, Belarus, Bolivia, Bosnia and Herzegovina, Ecuador, Egypt, Gabon, Ghana, Guatemala, Guinea, Guyana, Honduras, Hungary, India, Iran, Iraq, Jordan, Kazakhstan, Kyrgyzstan, Libya, Mexico, Mongolia, Montenegro, Myanmar, Namibia, Nepal, Nicaragua, Nigeria, North Macedonia, Oman, Pakistan, Paraguay, Philippines, Moldova, Saint Vincent and the Grenadines, San Marino, Serbia, Seychelles, Slovakia, Sri Lanka, Syria, Tunisia, Turkmenistan, United Arab Emirates, Uzbekistan, Venezuela, Vietnam, Zimbabwe |
|                  | Licensure                              | In use               | Russia                                                                                                                                                                                                                                                                                                                                                                                                                                                                                                                                                                                                      |
|                  | Recipients of COVAX or other countries | In use               | Angola                                                                                                                                                                                                                                                                                                                                                                                                                                                                                                                                                                                                      |
| 6. Vaxzevria     | Conditional marketing                  | Currently not in use | Denmark, Norway, Sweden                                                                                                                                                                                                                                                                                                                                                                                                                                                                                                                                                                                     |
|                  | Conditional marketing                  | In use               | Austria, Bulgaria, Canada, Croatia, Cyprus, Czechia, Estonia, Finland, France, Germany, Greece, Iceland, Ireland, Italy, Latvia, Lithuania, Luxembourg, Malta, Netherlands, Romania, Slovakia, Slovenia, Spain,                                                                                                                                                                                                                                                                                                                                                                                             |

|                            |                                        |                      |                                                                                                                                                                                                                                                                                                                                                                                                                                                                                                                                                                                                                                                                                                                                                          |
|----------------------------|----------------------------------------|----------------------|----------------------------------------------------------------------------------------------------------------------------------------------------------------------------------------------------------------------------------------------------------------------------------------------------------------------------------------------------------------------------------------------------------------------------------------------------------------------------------------------------------------------------------------------------------------------------------------------------------------------------------------------------------------------------------------------------------------------------------------------------------|
|                            |                                        |                      | Vietnam                                                                                                                                                                                                                                                                                                                                                                                                                                                                                                                                                                                                                                                                                                                                                  |
|                            | Emergency Use Authorization            | In use               | Albania, Andorra, Antigua and Barbuda, Argentina, Armenia, Australia, Azerbaijan, Bahamas, Belgium, Belize, Benin, Bolivia, Bosnia and Herzegovina, Botswana, Brazil, Brunei, Burkina Faso, Cabo Verde, Chile, Colombia, Costa Rica, Cote d'Ivoire, Dominica, Dominican Republic, Ecuador, Egypt, El Salvador, Georgia, Guatemala, Guyana, Honduras, Hungary, Indonesia, Iraq, Japan, Kenya, Kuwait, Kyrgyzstan, Lebanon, Libya, Malaysia, Mexico, Mongolia, Montenegro, Namibia, Nauru, Nicaragua, Niger, North Macedonia, Oman, Pakistan, Panama, Paraguay, Peru, Philippines, Poland, Portugal, Saint Lucia, Saint Vincent and the Grenadines, Samoa, Saudi Arabia, Serbia, Thailand, Tunisia, Ukraine, United Arab Emirates, United Kingdom, Uruguay |
|                            | Recipients of COVAX or other countries | In use               | Afghanistan, Algeria, Central African Republic, Democratic Republic of the Congo, Eswatini, Ethiopia, Fiji, Gambia, Guinea-Bissau, Jamaica, Jordan, Kiribati, Malawi, Mauritania, Mozambique, Papua New Guinea, Republic of the Congo, Rwanda, Sao Tome and Principe, Senegal, Sierra Leone, Solomon Islands, Somalia, South Sudan, Sudan, Tajikistan, Timor-Leste, Togo, Tonga, Tuvalu, Vanuatu, Zambia                                                                                                                                                                                                                                                                                                                                                 |
| <b>Conjugate vaccine</b>   |                                        |                      |                                                                                                                                                                                                                                                                                                                                                                                                                                                                                                                                                                                                                                                                                                                                                          |
| 1. Soberana 02             | Emergency Use Authorization            | In use               | Cuba, Iran, Nicaragua                                                                                                                                                                                                                                                                                                                                                                                                                                                                                                                                                                                                                                                                                                                                    |
| <b>DNA vaccine</b>         |                                        |                      |                                                                                                                                                                                                                                                                                                                                                                                                                                                                                                                                                                                                                                                                                                                                                          |
| 1. ZyCoV-D                 | Emergency Use Authorization            | Currently not in use | India                                                                                                                                                                                                                                                                                                                                                                                                                                                                                                                                                                                                                                                                                                                                                    |
| <b>Inactivated vaccine</b> |                                        |                      |                                                                                                                                                                                                                                                                                                                                                                                                                                                                                                                                                                                                                                                                                                                                                          |
| 1. BBIBP-CorV              | Conditional marketing                  | In use               | China                                                                                                                                                                                                                                                                                                                                                                                                                                                                                                                                                                                                                                                                                                                                                    |
|                            | Emergency Use                          | In use               | Antigua and Barbuda, Argentina, Armenia, Bahrain, Bangladesh, Barbados, Belarus, Belize, Bolivia,                                                                                                                                                                                                                                                                                                                                                                                                                                                                                                                                                                                                                                                        |

|              |                                        |                      |                                                                                                                                                                                                                                                                                                                                                                                                                                                                                                                                                           |
|--------------|----------------------------------------|----------------------|-----------------------------------------------------------------------------------------------------------------------------------------------------------------------------------------------------------------------------------------------------------------------------------------------------------------------------------------------------------------------------------------------------------------------------------------------------------------------------------------------------------------------------------------------------------|
|              | Authorization                          |                      | Brunei, Cambodia, Cameroon, Comoros, Dominica, Dominican Republic, Egypt, Equatorial Guinea, Gabon, Gambia, Georgia, Guyana, Hungary, Indonesia, Iran, Iraq, Jordan, Kenya, Kyrgyzstan, Laos, Lesotho, Madagascar, Maldives, Mauritania, Mauritius, Mongolia, Montenegro, Morocco, Namibia, Nepal, Niger, Nigeria, North Macedonia, Oman, Pakistan, Paraguay, Peru, Philippines, Republic of the Congo, Saudi Arabia, Senegal, Serbia, Seychelles, Sri Lanka, Suriname, Thailand, United Arab Emirates, Venezuela, Vietnam, Zimbabwe, Trinidad and Tobago |
|              | Recipients of COVAX or other countries | In use               | Afghanistan, Angola, Burundi, Chad, Cote d'Ivoire, Ethiopia, Guinea-Bissau, Kazakhstan, Kiribati, Lebanon, Mozambique, Papua New Guinea, Rwanda, Sierra Leone, Solomon Islands, Somalia, Sudan, Tanzania, Vanuatu, Zambia                                                                                                                                                                                                                                                                                                                                 |
|              | Special access route                   | In use               | Singapore                                                                                                                                                                                                                                                                                                                                                                                                                                                                                                                                                 |
| 2. CoronaVac | Conditional marketing                  | In use               | China                                                                                                                                                                                                                                                                                                                                                                                                                                                                                                                                                     |
|              | Emergency Use Authorization            | Currently not in use | Panama                                                                                                                                                                                                                                                                                                                                                                                                                                                                                                                                                    |
|              | Emergency Use Authorization            | In use               | Albania, Azerbaijan, Bangladesh, Benin, Bosnia and Herzegovina, Botswana, Cambodia, Chile, Colombia, Djibouti, Dominican Republic, Ecuador, Egypt, El Salvador, Equatorial Guinea, Georgia, Guinea, Indonesia, Kazakhstan, Malaysia, Mexico, Nepal, North Macedonia, Oman, Pakistan, Paraguay, Philippines, Singapore, Thailand, Tunisia, Turkey, Ukraine, Uruguay, Venezuela, Zimbabwe                                                                                                                                                                   |
|              | Licensure                              | In use               | Brazil                                                                                                                                                                                                                                                                                                                                                                                                                                                                                                                                                    |
|              | Recipients of COVAX or other countries | In use               | Algeria, Armenia, Libya, Mali, Moldova, Tajikistan, Timor-Leste, Togo                                                                                                                                                                                                                                                                                                                                                                                                                                                                                     |
|              |                                        |                      |                                                                                                                                                                                                                                                                                                                                                                                                                                                                                                                                                           |
| 3. Covaxin   | Emergency Use Authorization            | In use               | Botswana, Comoros, Guyana, India, Iran, Mauritius, Mexico, Nepal, Paraguay, Philippines, Zimbabwe                                                                                                                                                                                                                                                                                                                                                                                                                                                         |

|                     |                             |        |                                                                                                                                                                                                                                                                                                                                                                                                                                                                                                                                                                                                                  |
|---------------------|-----------------------------|--------|------------------------------------------------------------------------------------------------------------------------------------------------------------------------------------------------------------------------------------------------------------------------------------------------------------------------------------------------------------------------------------------------------------------------------------------------------------------------------------------------------------------------------------------------------------------------------------------------------------------|
| 4. Covidful         | Emergency Use Authorization | In use | China                                                                                                                                                                                                                                                                                                                                                                                                                                                                                                                                                                                                            |
| 5. COVIran Barekat  | Emergency Use Authorization | In use | Iran                                                                                                                                                                                                                                                                                                                                                                                                                                                                                                                                                                                                             |
| 6. CoviVac          | Licensure                   | In use | Russia                                                                                                                                                                                                                                                                                                                                                                                                                                                                                                                                                                                                           |
| 7. FAKHRAVAC        | Emergency Use Authorization | In use | Iran                                                                                                                                                                                                                                                                                                                                                                                                                                                                                                                                                                                                             |
| 8. KCONVAC          | Emergency Use Authorization | In use | China                                                                                                                                                                                                                                                                                                                                                                                                                                                                                                                                                                                                            |
| 9. QazVac           | Emergency Use Authorization | In use | Kazakhstan, Kyrgyzstan                                                                                                                                                                                                                                                                                                                                                                                                                                                                                                                                                                                           |
| 10. WBIP-CorV       | Conditional marketing       | In use | China                                                                                                                                                                                                                                                                                                                                                                                                                                                                                                                                                                                                            |
| <b>mRNA vaccine</b> |                             |        |                                                                                                                                                                                                                                                                                                                                                                                                                                                                                                                                                                                                                  |
| 1. Comirnaty        | Conditional marketing       | In use | Austria, Bulgaria, Canada, Croatia, Cyprus, Czechia, Denmark, Estonia, Finland, France, Germany, Greece, Iceland, Ireland, Italy, Latvia, Lithuania, Luxembourg, Malta, Monaco, Netherlands, Romania, San Marino, Slovakia, Slovenia, South Korea, Spain, Sweden                                                                                                                                                                                                                                                                                                                                                 |
|                     | Emergency Use Authorization | In use | Albania, Andorra, Argentina, Armenia, Australia, Azerbaijan, Bahamas, Bahrain, Bangladesh, Barbados, Belgium, Belize, Bhutan, Bolivia, Bosnia and Herzegovina, Botswana, Brazil, Brunei, Cabo Verde, Chile, Colombia, Cook Islands, Costa Rica, Democratic Republic of the Congo, Dominican Republic, Ecuador, Egypt, El Salvador, Gabon, Georgia, Guatemala, Honduras, Hungary, Indonesia, Iraq, Israel, Jamaica, Japan, Jordan, Kazakhstan, Kenya, Kuwait, Laos, Lebanon, Libya, Madagascar, Malaysia, Maldives, Marshall Islands, Mauritania, Mexico, Micronesia, Mongolia, Montenegro, Morocco, Namibia, New |



|                                |                                        |                      |                                                                                                                                                                                                                                                                                                                                                                                                                                                                                                          |
|--------------------------------|----------------------------------------|----------------------|----------------------------------------------------------------------------------------------------------------------------------------------------------------------------------------------------------------------------------------------------------------------------------------------------------------------------------------------------------------------------------------------------------------------------------------------------------------------------------------------------------|
|                                |                                        |                      | Zealand, Nigeria, Niue, North Macedonia, Norway, Oman, Pakistan, Panama, Papua New Guinea, Paraguay, Peru, Philippines, Poland, Portugal, Qatar, Moldova, Saint Kitts and Nevis, Saint Lucia, Saint Vincent and the Grenadines, Serbia, Singapore, South Africa, Sri Lanka, Suriname, Thailand, Tunisia, Turkey, Ukraine, United Arab Emirates, United Kingdom, United States, Uruguay, Vietnam, Trinidad and Tobago                                                                                     |
|                                | Licensure                              | In use               | Saudi Arabia, Switzerland                                                                                                                                                                                                                                                                                                                                                                                                                                                                                |
|                                | Recipients of COVAX or other countries | In use               | Angola, Antigua and Barbuda, Benin, Chad, Cote d'Ivoire, Dominica, Grenada, Mauritius, Rwanda, Samoa, Sierra Leone, Sudan, Togo, Uzbekistan                                                                                                                                                                                                                                                                                                                                                              |
| 2. Spikevax                    | Conditional marketing                  | In use               | Austria, Bulgaria, Canada, Croatia, Cyprus, Czechia, Denmark, Estonia, Finland, France, Germany, Greece, Iceland, Ireland, Italy, Latvia, Lithuania, Luxembourg, Malta, Netherlands, Romania, San Marino, Slovakia, Slovenia, Spain, Sweden                                                                                                                                                                                                                                                              |
|                                | Emergency Use Authorization            | Currently not in use | India                                                                                                                                                                                                                                                                                                                                                                                                                                                                                                    |
|                                | Emergency Use Authorization            | In use               | Argentina, Australia, Belgium, Botswana, Colombia, Democratic Republic of the Congo, Guatemala, Haiti, Honduras, Hungary, Indonesia, Israel, Japan, Kenya, Kuwait, Libya, Marshall Islands, Micronesia, Mongolia, Nigeria, Norway, Oman, Pakistan, Paraguay, Philippines, Poland, Portugal, Qatar, South Korea, Saint Vincent and the Grenadines, Saudi Arabia, Singapore, Sri Lanka, Suriname, Switzerland, Thailand, Ukraine, United Arab Emirates, United Kingdom, United States, Uzbekistan, Vietnam |
|                                | Recipients of COVAX or other countries | In use               | Fiji, Palau, Republic of the Congo, Rwanda, Tajikistan, Tunisia                                                                                                                                                                                                                                                                                                                                                                                                                                          |
| <b>Protein subunit vaccine</b> |                                        |                      |                                                                                                                                                                                                                                                                                                                                                                                                                                                                                                          |
| 1. Abdala                      | Emergency Use                          | In use               | Cuba, Nicaragua, Venezuela, Vietnam                                                                                                                                                                                                                                                                                                                                                                                                                                                                      |

|                 |                                        |        |                              |
|-----------------|----------------------------------------|--------|------------------------------|
|                 | Authorization                          |        |                              |
| 2. EpiVacCorona | Emergency Use Authorization            | In use | Turkmenistan                 |
|                 | Licensure                              | In use | Russia                       |
|                 | Recipients of COVAX or other countries | In use | Belarus                      |
| 3. Zifivax      | Emergency Use Authorization            | In use | China, Indonesia, Uzbekistan |

**Table S2. Self-payment Fee , target population, and contraindications recommended by regulatory agencies**

| Country       | Payment | Target population                                                                     | Contraindicated population | Data source                                                                                                                                                                                                                                                                                                                                                                                                                                                     |
|---------------|---------|---------------------------------------------------------------------------------------|----------------------------|-----------------------------------------------------------------------------------------------------------------------------------------------------------------------------------------------------------------------------------------------------------------------------------------------------------------------------------------------------------------------------------------------------------------------------------------------------------------|
| <b>Africa</b> |         |                                                                                       |                            |                                                                                                                                                                                                                                                                                                                                                                                                                                                                 |
| Algeria       | Free    | 18+                                                                                   | No data                    | <a href="http://www.xinhuanet.com/english/2020-12/21/c_139605514.htm">http://www.xinhuanet.com/english/2020-12/21/c_139605514.htm</a><br><a href="http://www.news.cn/english/2021-09/05/c_1310168528.htm">http://www.news.cn/english/2021-09/05/c_1310168528.htm</a>                                                                                                                                                                                            |
| Angola        | Free    | 18+                                                                                   | No data                    | <a href="https://www.macaubusiness.com/angola-free-covid-19-vaccinations-should-begin-in-feb-with-priority-for-over-40s-health-minister/">https://www.macaubusiness.com/angola-free-covid-19-vaccinations-should-begin-in-feb-with-priority-for-over-40s-health-minister/</a><br><a href="https://minsa.gov.ao/ao/">https://minsa.gov.ao/ao/</a><br><a href="https://ao.usembassy.gov/covid-19-information/">https://ao.usembassy.gov/covid-19-information/</a> |
| Benin         | Free    | 18+                                                                                   | No data                    | <a href="https://documents1.worldbank.org/curated/en/936011623022343506/pdf/Project-Information-Document-Benin-COVID-19-second-Vaccines-Additional-Financing-to-COVID-19-Preparedness-and-Response-Project-P176562.pdf">https://documents1.worldbank.org/curated/en/936011623022343506/pdf/Project-Information-Document-Benin-COVID-19-second-Vaccines-Additional-Financing-to-COVID-19-Preparedness-and-Response-Project-P176562.pdf</a>                       |
| Botswana      | No data | 18+                                                                                   | No data                    | <a href="https://fenyacovid.gov.bw/armready/">https://fenyacovid.gov.bw/armready/</a>                                                                                                                                                                                                                                                                                                                                                                           |
| Burkina Faso  | Free    | No data                                                                               | No data                    | <a href="https://bf.usembassy.gov/u-s-citizen-services/covid-19-information/">https://bf.usembassy.gov/u-s-citizen-services/covid-19-information/</a>                                                                                                                                                                                                                                                                                                           |
| Burundi       | No data | HCW; 60+; people with underlying conditions; people travelling abroad; any volunteers | No data                    | <a href="https://www.africanews.com/2021/10/19/burundi-begins-covid-19-vaccination-despite-hesitancy-among-its-people/">https://www.africanews.com/2021/10/19/burundi-begins-covid-19-vaccination-despite-hesitancy-among-its-people/</a>                                                                                                                                                                                                                       |
| Cabo Verde    | Free    | 18+                                                                                   | No data                    | <a href="https://reliefweb.int/report/cabo-verde/new-world-bank-support-equitable-access-covid-19-vaccines-cabo-verde">https://reliefweb.int/report/cabo-verde/new-world-bank-support-equitable-access-covid-19-vaccines-cabo-verde</a>                                                                                                                                                                                                                         |

|                                  |         |                                                                                                                            |                                                                                                                                           |                                                                                                                                                                                                                                                                                                                                                                        |
|----------------------------------|---------|----------------------------------------------------------------------------------------------------------------------------|-------------------------------------------------------------------------------------------------------------------------------------------|------------------------------------------------------------------------------------------------------------------------------------------------------------------------------------------------------------------------------------------------------------------------------------------------------------------------------------------------------------------------|
|                                  |         |                                                                                                                            |                                                                                                                                           | <a href="https://cv.usembassy.gov/covid-19-information/">https://cv.usembassy.gov/covid-19-information/</a>                                                                                                                                                                                                                                                            |
| Cameroon                         | No data | No data                                                                                                                    | No data                                                                                                                                   |                                                                                                                                                                                                                                                                                                                                                                        |
| Central African Republic         | No data | HCW; elderly people and / or people with chronic diseases                                                                  | No data                                                                                                                                   | <a href="https://peacekeeping.un.org/en/national-covid-19-vaccination-campaign-officially-launched-central-african-republic">https://peacekeeping.un.org/en/national-covid-19-vaccination-campaign-officially-launched-central-african-republic</a>                                                                                                                    |
| Chad                             | No data | No data                                                                                                                    | No data                                                                                                                                   |                                                                                                                                                                                                                                                                                                                                                                        |
| Comoros                          | No data | 18+                                                                                                                        | No data                                                                                                                                   | <a href="https://vaksiny.gov.mg/#/signin?from=/">https://vaksiny.gov.mg/#/signin?from=/</a>                                                                                                                                                                                                                                                                            |
| Cote d'Ivoire                    | Free    | 18+                                                                                                                        | No data                                                                                                                                   | <a href="https://www.sante.gouv.ci/welcome/actualites/1192">https://www.sante.gouv.ci/welcome/actualites/1192</a>                                                                                                                                                                                                                                                      |
| Democratic Republic of the Congo | No data | HCW; 55+; People suffering from serious health conditions such as kidney disease, high blood pressure or diabetes mellitus | No data                                                                                                                                   | <a href="https://healthpolicy-watch.news/dr-congo-finally-launches-covid-19-vaccinations-after-concerns-about-astrazeneca/">https://healthpolicy-watch.news/dr-congo-finally-launches-covid-19-vaccinations-after-concerns-about-astrazeneca/</a>                                                                                                                      |
| Equatorial Guinea                | Free    | No data                                                                                                                    | No data                                                                                                                                   | <a href="https://gq.usembassy.gov/covid-19-information/">https://gq.usembassy.gov/covid-19-information/</a>                                                                                                                                                                                                                                                            |
| Eritrea                          | No data | No data                                                                                                                    | No data                                                                                                                                   |                                                                                                                                                                                                                                                                                                                                                                        |
| Eswatini                         | No data | 12+                                                                                                                        | No data                                                                                                                                   | <a href="https://twitter.com/eswatinigovern1/status/1445737600732459017?lang=ar-x-fm">https://twitter.com/eswatinigovern1/status/1445737600732459017?lang=ar-x-fm</a>                                                                                                                                                                                                  |
| Ethiopia                         | No data | 35+; 18+ with health problems                                                                                              | People with a history of anaphylaxis to any component of the vaccine or an anaphylactic reaction following the first dose of this vaccine | <a href="https://www.moh.gov.et/ejcc/am/press-release-on-covid19">https://www.moh.gov.et/ejcc/am/press-release-on-covid19</a><br><a href="https://www.eph.gov.et/images/novel_coronavirus/EPHI_PHEOC_COVID-19_Weekly_Bulletin_45_English_03132021.pdf">https://www.eph.gov.et/images/novel_coronavirus/EPHI_PHEOC_COVID-19_Weekly_Bulletin_45_English_03132021.pdf</a> |

|               |         |                                                    |         |                                                                                                                                                                                                                                                                                                                                                                                                                                                                                    |
|---------------|---------|----------------------------------------------------|---------|------------------------------------------------------------------------------------------------------------------------------------------------------------------------------------------------------------------------------------------------------------------------------------------------------------------------------------------------------------------------------------------------------------------------------------------------------------------------------------|
| Gabon         | No data | No data                                            | No data |                                                                                                                                                                                                                                                                                                                                                                                                                                                                                    |
| Gambia        | Free    | HCW; People with underlying medical condition; 65+ | No data | <a href="https://www.facebook.com/permalink.php?story_fbid=526763178764376&amp;id=100866698020695">https://www.facebook.com/permalink.php?story_fbid=526763178764376&amp;id=100866698020695</a><br><a href="https://www.unicef.org/wca/press-releases/first-tranche-covid-19-vaccines-arrives-gambia-covax-initiative">https://www.unicef.org/wca/press-releases/first-tranche-covid-19-vaccines-arrives-gambia-covax-initiative</a>                                               |
| Ghana         | Free    | 18+                                                | No data | <a href="http://fdaghana.gov.gh/news-media.php?page=78">http://fdaghana.gov.gh/news-media.php?page=78</a><br><a href="http://www.xinhuanet.com/english/2021-08/17/c_1310130940.htm">http://www.xinhuanet.com/english/2021-08/17/c_1310130940.htm</a>                                                                                                                                                                                                                               |
| Guinea        | No data | No data                                            | No data |                                                                                                                                                                                                                                                                                                                                                                                                                                                                                    |
| Guinea-Bissau | No data | No data                                            | No data |                                                                                                                                                                                                                                                                                                                                                                                                                                                                                    |
| Kenya         | Free    | 18+                                                | No data | <a href="https://www.gavi.org/vaccineswork/ins-and-outs-kenyas-covid-19-vaccine-rollout-plan">https://www.gavi.org/vaccineswork/ins-and-outs-kenyas-covid-19-vaccine-rollout-plan</a>                                                                                                                                                                                                                                                                                              |
| Lesotho       | No data | 16+                                                | No data | <a href="https://www.gov.ls/his-majesty-launches-covid-19-vaccine-roll-out/">https://www.gov.ls/his-majesty-launches-covid-19-vaccine-roll-out/</a>                                                                                                                                                                                                                                                                                                                                |
| Liberia       | Free    | 18+                                                | No data | <a href="https://frontpageafricaonline.com/health/crusaders-for-peace-unicef-partner-to-end-covid-19-through-rapid-immunization/">https://frontpageafricaonline.com/health/crusaders-for-peace-unicef-partner-to-end-covid-19-through-rapid-immunization/</a><br><a href="https://lr.usembassy.gov/wp-content/uploads/sites/53/COVID-19-Vaccine-Fact-Sheet_FINAL_3Aug21.pdf">https://lr.usembassy.gov/wp-content/uploads/sites/53/COVID-19-Vaccine-Fact-Sheet_FINAL_3Aug21.pdf</a> |
| Madagascar    | Free    | 18+                                                | No data | <a href="https://mg.usembassy.gov/u-s-citizen-services/security-and-travel-information/covid-19-information/">https://mg.usembassy.gov/u-s-citizen-services/security-and-travel-information/covid-19-information/</a>                                                                                                                                                                                                                                                              |
| Malawi        | Free    | 18+                                                | No data | <a href="https://mg.usembassy.gov/u-s-citizen-services/security-and-travel">https://mg.usembassy.gov/u-s-citizen-services/security-and-travel</a>                                                                                                                                                                                                                                                                                                                                  |

|                       |         |         |                                                     |                                                                                                                                                                                                                                                                                                                                                                                      |
|-----------------------|---------|---------|-----------------------------------------------------|--------------------------------------------------------------------------------------------------------------------------------------------------------------------------------------------------------------------------------------------------------------------------------------------------------------------------------------------------------------------------------------|
|                       |         |         |                                                     | -information/covid-19-information/                                                                                                                                                                                                                                                                                                                                                   |
| Mali                  | No data | 18+     | No data                                             | <a href="http://www.sante.gov.ml/index.php/actualites/communiqués/item/6341-lutte-contre-la-covid-19-au-mali-835-200-doses-de-sinovac-pour-poursuivre-la-campagne-de-vaccination">http://www.sante.gov.ml/index.php/actualites/communiqués/item/6341-lutte-contre-la-covid-19-au-mali-835-200-doses-de-sinovac-pour-poursuivre-la-campagne-de-vaccination</a>                        |
| Mauritania            | Free    | No data | No data                                             | <a href="https://www.aa.com.tr/en/africa/mauritania-begins-covid-19-vaccination-campaign/2189322">https://www.aa.com.tr/en/africa/mauritania-begins-covid-19-vaccination-campaign/2189322</a>                                                                                                                                                                                        |
| Mauritius             | Free    | 12+     | No data                                             | <a href="https://health.govmu.org/Documents/Main%20Page/Corona/775_New%20Registration%20and%20Consent%20Form%20Covid-19%20Vaccination.pdf">https://health.govmu.org/Documents/Main%20Page/Corona/775_New%20Registration%20and%20Consent%20Form%20Covid-19%20Vaccination.pdf</a>                                                                                                      |
| Mozambique            | No data | 15+     | Pregnant women                                      | <a href="https://covid19.ins.gov.mz/vacina-covid-19/">https://covid19.ins.gov.mz/vacina-covid-19/</a><br><a href="https://covid19.ins.gov.mz/primeiro-ministro-lancou-esta-sexta-feira-o-plano-nacional-de-vacinacao/">https://covid19.ins.gov.mz/primeiro-ministro-lancou-esta-sexta-feira-o-plano-nacional-de-vacinacao/</a>                                                       |
| Namibia               | Free    | 18+     | No data                                             | <a href="https://www.facebook.com/permalink.php?story_fbid=813016316038040&amp;id=339157366757273">https://www.facebook.com/permalink.php?story_fbid=813016316038040&amp;id=339157366757273</a><br><a href="https://www.namibian.com.na/208360/archive-read/Namibias-Covid-19-vaccine-delayed">https://www.namibian.com.na/208360/archive-read/Namibias-Covid-19-vaccine-delayed</a> |
| Niger                 | No data | 18+     | No data                                             | <a href="https://ne.usembassy.gov/u-s-citizen-services/covid-19-information/">https://ne.usembassy.gov/u-s-citizen-services/covid-19-information/</a>                                                                                                                                                                                                                                |
| Nigeria               | Free    | 16+     | People with allergic reactions to vaccine component | <a href="https://nphcda.gov.ng/faqs/">https://nphcda.gov.ng/faqs/</a>                                                                                                                                                                                                                                                                                                                |
| Republic of the Congo | Free    | No data | No data                                             | <a href="https://docs.google.com/forms/d/e/1FAIpQLSc79P2xWVijpzwYs7rJ_n661seDoHEu-ZIH69qp7jdDkLq9Aw/viewform">https://docs.google.com/forms/d/e/1FAIpQLSc79P2xWVijpzwYs7rJ_n661seDoHEu-ZIH69qp7jdDkLq9Aw/viewform</a>                                                                                                                                                                |
| Rwanda                | Free    | 18+     | No data                                             | <a href="https://www.premiumtimesng.com/news/more-news/430797-rwa">https://www.premiumtimesng.com/news/more-news/430797-rwa</a>                                                                                                                                                                                                                                                      |

|                       |         |         |                                                                                                                                                                                                                                                                                                                        |                                                                                                                                                                                                                                                                                                                                                                                                                                                                                                                                                                                                                                                                                                                                             |
|-----------------------|---------|---------|------------------------------------------------------------------------------------------------------------------------------------------------------------------------------------------------------------------------------------------------------------------------------------------------------------------------|---------------------------------------------------------------------------------------------------------------------------------------------------------------------------------------------------------------------------------------------------------------------------------------------------------------------------------------------------------------------------------------------------------------------------------------------------------------------------------------------------------------------------------------------------------------------------------------------------------------------------------------------------------------------------------------------------------------------------------------------|
|                       |         |         |                                                                                                                                                                                                                                                                                                                        | <a href="#">nda-offers-free-covid-19-vaccinations-to-citizens.html</a><br><a href="https://rbc.gov.rw/index.php?id=100&amp;tx_news_pi1%5Bnews%5D=621&amp;tx_news_pi1%5Bday%5D=22&amp;tx_news_pi1%5Bmonth%5D=8&amp;tx_news_pi1%5Byear%5D=2021&amp;cHash=de0254720f9498593147d16c69f4cf8d">https://rbc.gov.rw/index.php?id=100&amp;tx_news_pi1%5Bnews%5D=621&amp;tx_news_pi1%5Bday%5D=22&amp;tx_news_pi1%5Bmonth%5D=8&amp;tx_news_pi1%5Byear%5D=2021&amp;cHash=de0254720f9498593147d16c69f4cf8d</a>                                                                                                                                                                                                                                           |
| Sao Tome and Principe | No data | No data | No data                                                                                                                                                                                                                                                                                                                |                                                                                                                                                                                                                                                                                                                                                                                                                                                                                                                                                                                                                                                                                                                                             |
| Senegal               | Free    | 18+     | No data                                                                                                                                                                                                                                                                                                                | <a href="https://sn.usembassy.gov/covid-19-information/">https://sn.usembassy.gov/covid-19-information/</a>                                                                                                                                                                                                                                                                                                                                                                                                                                                                                                                                                                                                                                 |
| Seychelles            | Free    | 12+     | No data                                                                                                                                                                                                                                                                                                                | <a href="https://allafrica.com/stories/202108270089.html">https://allafrica.com/stories/202108270089.html</a><br><a href="http://www.health.gov.sc/index.php/covid-19-vaccination-faqs/">http://www.health.gov.sc/index.php/covid-19-vaccination-faqs/</a>                                                                                                                                                                                                                                                                                                                                                                                                                                                                                  |
| Sierra Leone          | Free    | 18+     | No data                                                                                                                                                                                                                                                                                                                | <a href="https://dhse.gov.sl/wp-content/uploads/2021/09/PUBLIC-NOTICE-covid-113092021-1-1.pdf">https://dhse.gov.sl/wp-content/uploads/2021/09/PUBLIC-NOTICE-covid-113092021-1-1.pdf</a>                                                                                                                                                                                                                                                                                                                                                                                                                                                                                                                                                     |
| South Africa          | Free    | 12+     | People with a history of severe allergic reaction to any ingredient in the vaccine; people who is allergic to polyethene glycol (PEG) should not get the Pfizer vaccine, as it is one of the components; people who had a severe allergic reaction after the first dose should not get the second dose of that vaccine | <a href="https://www.sahpra.org.za/wp-content/uploads/2021/04/SAHPRA-Registration-with-conditions-for-the-Covid-19-vaccine-Janssen-Media-release-statement_final.pdf">https://www.sahpra.org.za/wp-content/uploads/2021/04/SAHPRA-Registration-with-conditions-for-the-Covid-19-vaccine-Janssen-Media-release-statement_final.pdf</a><br><a href="https://www.iol.co.za/sunday-tribune/news/children-over-12-now-eligible-to-receive-covid-vaccine-58327f81-c0a3-49de-b4b0-097c605fa3aa">https://www.iol.co.za/sunday-tribune/news/children-over-12-now-eligible-to-receive-covid-vaccine-58327f81-c0a3-49de-b4b0-097c605fa3aa</a><br><a href="https://www.gov.za/coronavirus/faqs/vaccine">https://www.gov.za/coronavirus/faqs/vaccine</a> |
| South Sudan           | Free    | 18+     | No data                                                                                                                                                                                                                                                                                                                | <a href="https://www.afro.who.int/news/south-sudan-receives-first-batch-covid-19-vaccines-through-covax-facility">https://www.afro.who.int/news/south-sudan-receives-first-batch-covid-19-vaccines-through-covax-facility</a><br><a href="https://www.afro.who.int/news/south-sudan-receives-its-first-cons">https://www.afro.who.int/news/south-sudan-receives-its-first-cons</a>                                                                                                                                                                                                                                                                                                                                                          |

|                     |         |     |                                                                                                          |                                                                                                                                                                                                                                                                                                                                                                                                                                            |
|---------------------|---------|-----|----------------------------------------------------------------------------------------------------------|--------------------------------------------------------------------------------------------------------------------------------------------------------------------------------------------------------------------------------------------------------------------------------------------------------------------------------------------------------------------------------------------------------------------------------------------|
|                     |         |     |                                                                                                          | ignment-johnson-johnson-covid-19-vaccines-through-covax                                                                                                                                                                                                                                                                                                                                                                                    |
| Tanzania            | Free    | 18+ | No data                                                                                                  | <a href="https://www.afro.who.int/news/united-republic-tanzania-receives-first-covax-shipment">https://www.afro.who.int/news/united-republic-tanzania-receives-first-covax-shipment</a><br><a href="https://tz.usembassy.gov/covid-19-information/">https://tz.usembassy.gov/covid-19-information/</a>                                                                                                                                     |
| Togo                | Free    | 20+ | No data                                                                                                  | <a href="https://vaccin.covid19.gouv.tg/faq/">https://vaccin.covid19.gouv.tg/faq/</a><br><a href="https://vaccin.covid19.gouv.tg/strategie-vaccinale/">https://vaccin.covid19.gouv.tg/strategie-vaccinale/</a>                                                                                                                                                                                                                             |
| Uganda              | No data | 12+ | No data                                                                                                  | <a href="http://www.xinhuanet.com/english/africa/2021-07/26/c_1310086931.htm">http://www.xinhuanet.com/english/africa/2021-07/26/c_1310086931.htm</a>                                                                                                                                                                                                                                                                                      |
| Zambia              | Free    | 18+ | No data                                                                                                  | <a href="https://www.usaid.gov/zambia/press-releases/sep-3-2021-united-states-provides-additional-67-million-covid-assistance">https://www.usaid.gov/zambia/press-releases/sep-3-2021-united-states-provides-additional-67-million-covid-assistance</a><br><a href="https://www.afro.who.int/news/zambia-launches-covid-19-vaccination">https://www.afro.who.int/news/zambia-launches-covid-19-vaccination</a>                             |
| Zimbabwe            | Free    | 14+ | No data                                                                                                  | <a href="https://www.aa.com.tr/en/africa/zimbabwe-free-vaccination-to-begin-thursday/2147237">https://www.aa.com.tr/en/africa/zimbabwe-free-vaccination-to-begin-thursday/2147237</a><br><a href="https://apnews.com/article/lifestyle-africa-health-zimbabwe-coronavirus-pandemic-3e0b007ccccf08ae285710250daa84be">https://apnews.com/article/lifestyle-africa-health-zimbabwe-coronavirus-pandemic-3e0b007ccccf08ae285710250daa84be</a> |
| <b>Americas</b>     |         |     |                                                                                                          |                                                                                                                                                                                                                                                                                                                                                                                                                                            |
| Antigua and Barbuda | Free    | 12+ | Pregnant / breastfeeding women; persons who have severe allergic reactions to ingredients of the vaccine | <a href="https://www.facebook.com/investingforwellness/posts/1262969224143049">https://www.facebook.com/investingforwellness/posts/1262969224143049</a><br><a href="https://vaccineantiguabarbuda.com/faq/">https://vaccineantiguabarbuda.com/faq/</a>                                                                                                                                                                                     |
| Argentina           | Free    | 12+ | People with an allergic reaction to vaccine components or first dose; an acute SARS-CoV-2                | <a href="https://www.argentina.gob.ar/coronavirus/vacuna/preguntas-frecuentes#7">https://www.argentina.gob.ar/coronavirus/vacuna/preguntas-frecuentes#7</a>                                                                                                                                                                                                                                                                                |



|          |         |     |                                                                        |                                                                                                                                                                                                                                                                                                                                                                                                                                                                                                                    |
|----------|---------|-----|------------------------------------------------------------------------|--------------------------------------------------------------------------------------------------------------------------------------------------------------------------------------------------------------------------------------------------------------------------------------------------------------------------------------------------------------------------------------------------------------------------------------------------------------------------------------------------------------------|
|          |         |     | infection; pre-vaccination pregnancy                                   | <a href="https://www.argentina.gob.ar/coronavirus/vacuna/preguntas-frecuentes#22">https://www.argentina.gob.ar/coronavirus/vacuna/preguntas-frecuentes#22</a>                                                                                                                                                                                                                                                                                                                                                      |
| Bahamas  | Free    | 12+ | No data                                                                | <a href="https://www.bahamas.gov.bs/wps/portal/public">https://www.bahamas.gov.bs/wps/portal/public</a><br><a href="https://vax.gov.bs/">https://vax.gov.bs/</a>                                                                                                                                                                                                                                                                                                                                                   |
| Barbados | Free    | 12+ | No data                                                                | <a href="https://gisbarbados.gov.bb/blog/pfizer-vaccine-now-available-to-the-general-public/">https://gisbarbados.gov.bb/blog/pfizer-vaccine-now-available-to-the-general-public/</a>                                                                                                                                                                                                                                                                                                                              |
| Belize   | No data | 12+ | No data                                                                | <a href="https://www.facebook.com/Belizehealth/posts/2767419013556496">https://www.facebook.com/Belizehealth/posts/2767419013556496</a>                                                                                                                                                                                                                                                                                                                                                                            |
| Bolivia  | Free    | 16+ | No data                                                                | <a href="https://www.unidoscontraelcovid.gob.bo/index.php/vacunas/">https://www.unidoscontraelcovid.gob.bo/index.php/vacunas/</a><br><a href="https://www.unidoscontraelcovid.gob.bo/index.php/2021/10/07/ministerio-de-salud-coordinara-con-educacion-para-inmunizar-contr-el-covid-19-a-menores-de-edad-entre-16-y-17-anos/">https://www.unidoscontraelcovid.gob.bo/index.php/2021/10/07/ministerio-de-salud-coordinara-con-educacion-para-inmunizar-contr-el-covid-19-a-menores-de-edad-entre-16-y-17-anos/</a> |
| Brazil   | Free    | 12+ | People with allergic action to the first dose or any vaccine component | <a href="https://translate.googleusercontent.com/translate_f#21">https://translate.googleusercontent.com/translate_f#21</a>                                                                                                                                                                                                                                                                                                                                                                                        |
| Canada   | Free    | 12+ | No data                                                                | <a href="https://www.canada.ca/en/public-health/services/diseases/coronavirus-disease-covid-19/vaccines/how-vaccinated.html">https://www.canada.ca/en/public-health/services/diseases/coronavirus-disease-covid-19/vaccines/how-vaccinated.html</a>                                                                                                                                                                                                                                                                |
| Chile    | Free    | 6+  | People with a known history of severe acute allergy (anaphylaxis)      | <a href="https://www.gob.cl/yomevacuno/">https://www.gob.cl/yomevacuno/</a><br><a href="https://www.gob.cl/yomevacuno/preguntasfrecuentes/">https://www.gob.cl/yomevacuno/preguntasfrecuentes/</a>                                                                                                                                                                                                                                                                                                                 |
| Colombia | Free    | 12+ | No data                                                                | <a href="https://www.como.gov/covidvaccine/#elementor-toc__heading-anchor-5">https://www.como.gov/covidvaccine/#elementor-toc__heading-anchor-5</a><br><a href="https://www.rcnradio.com/colombia/mayores-de-70-anos-podran-recibir-el-refuerzo-anticovid-de-su-vacuna-inicial-de-pfizer-o">https://www.rcnradio.com/colombia/mayores-de-70-anos-podran-recibir-el-refuerzo-anticovid-de-su-vacuna-inicial-de-pfizer-o</a>                                                                                         |

|                    |         |     |                                                                                |                                                                                                                                                                                                                                                                                                                                                                                                                                                                                                                                                                                                                                                    |
|--------------------|---------|-----|--------------------------------------------------------------------------------|----------------------------------------------------------------------------------------------------------------------------------------------------------------------------------------------------------------------------------------------------------------------------------------------------------------------------------------------------------------------------------------------------------------------------------------------------------------------------------------------------------------------------------------------------------------------------------------------------------------------------------------------------|
| Costa Rica         | Free    | 12+ | No data                                                                        | <a href="https://www.ccss.sa.cr/arc/covid19/Manual_procedimientos_vacunacion_COVID.pdf">https://www.ccss.sa.cr/arc/covid19/Manual_procedimientos_vacunacion_COVID.pdf</a>                                                                                                                                                                                                                                                                                                                                                                                                                                                                          |
| Cuba               | Free    | 2+  | No data                                                                        | <a href="https://salud.msp.gob.cu/actualizacion-de-la-vacunacion-en-el-marco-de-los-estudios-de-los-candidatos-vacunales-cubanos-y-la-intervencion-sanitaria/">https://salud.msp.gob.cu/actualizacion-de-la-vacunacion-en-el-marco-de-los-estudios-de-los-candidatos-vacunales-cubanos-y-la-intervencion-sanitaria/</a><br><a href="https://salud.msp.gob.cu/actualizacion-de-la-vacunacion-en-el-marco-de-los-estudios-de-los-candidatos-vacunales-cubanos-y-la-intervencion-sanitaria/">https://salud.msp.gob.cu/actualizacion-de-la-vacunacion-en-el-marco-de-los-estudios-de-los-candidatos-vacunales-cubanos-y-la-intervencion-sanitaria/</a> |
| Dominica           | No data | 12+ | No data                                                                        | <a href="http://news.gov.dm/news/5337-pfizer-vaccines-arrive-in-dominica">http://news.gov.dm/news/5337-pfizer-vaccines-arrive-in-dominica</a>                                                                                                                                                                                                                                                                                                                                                                                                                                                                                                      |
| Dominican Republic | No data | 12+ | No data                                                                        | <a href="https://covid-19pharmacovigilance.paho.org/pfizer-biontech">https://covid-19pharmacovigilance.paho.org/pfizer-biontech</a>                                                                                                                                                                                                                                                                                                                                                                                                                                                                                                                |
| Ecuador            | No data | 12+ | No data                                                                        | <a href="https://ec.usembassy.gov/covid-19-information-ecu-2/">https://ec.usembassy.gov/covid-19-information-ecu-2/</a><br><a href="https://www.coronavirusecuador.com/2021/09/inicio-vacunacion-a-poblacion-de-12-a-15-anos-en-coordinacion-entre-los-ministerios-de-salud-y-educacion/">https://www.coronavirusecuador.com/2021/09/inicio-vacunacion-a-poblacion-de-12-a-15-anos-en-coordinacion-entre-los-ministerios-de-salud-y-educacion/</a>                                                                                                                                                                                                 |
| El Salvador        | Free    | 6+  | No data                                                                        | <a href="https://www.presidencia.gob.sv/la-poblacion-meta-a-vacunar-contracovid-19-incremento-a-5-9-millones-con-la-inclusion-de-los-nuevos-grupos-etarios/">https://www.presidencia.gob.sv/la-poblacion-meta-a-vacunar-contracovid-19-incremento-a-5-9-millones-con-la-inclusion-de-los-nuevos-grupos-etarios/</a>                                                                                                                                                                                                                                                                                                                                |
| Grenada            | Free    | 12+ | People with a severe allergic reaction to any ingredient in a COVID-19 vaccine | <a href="https://covid19.gov.gd/faq-vaccination/">https://covid19.gov.gd/faq-vaccination/</a><br><a href="https://caribbean.loopnews.com/content/grenada-begins-its-pfizer-vaccine-roll-out-soon">https://caribbean.loopnews.com/content/grenada-begins-its-pfizer-vaccine-roll-out-soon</a>                                                                                                                                                                                                                                                                                                                                                       |

|           |         |                                       |                                                                                                                |                                                                                                                                                                                                                                                                                                                                                                                                                                                                                                                                                            |
|-----------|---------|---------------------------------------|----------------------------------------------------------------------------------------------------------------|------------------------------------------------------------------------------------------------------------------------------------------------------------------------------------------------------------------------------------------------------------------------------------------------------------------------------------------------------------------------------------------------------------------------------------------------------------------------------------------------------------------------------------------------------------|
| Guatemala | No data | 18+                                   | People with a fever; people with serious illness; pregnant women                                               | <a href="https://www.mspas.gob.gt/component/jdownloads/category/890-plan-nacional-de-vacunaci%C3%B3n-contra-la-covid-19.html?Itemid=-1">https://www.mspas.gob.gt/component/jdownloads/category/890-plan-nacional-de-vacunaci%C3%B3n-contra-la-covid-19.html?Itemid=-1</a>                                                                                                                                                                                                                                                                                  |
| Guyana    | Free    | 18+                                   | No data                                                                                                        | <a href="https://www.health.gov.gy/">https://www.health.gov.gy/</a>                                                                                                                                                                                                                                                                                                                                                                                                                                                                                        |
| Haiti     | Free    | No data                               | No data                                                                                                        | <a href="https://ht.usembassy.gov/covid-19-information/">https://ht.usembassy.gov/covid-19-information/</a>                                                                                                                                                                                                                                                                                                                                                                                                                                                |
| Honduras  | Free    | 15+; 12-15 with disability            | People with allergic reaction to the first dose or vaccine component; people with a fever                      | <a href="http://www.salud.gob.hn/site/index.php/component/edocman/resumen-ejecutivo-ampliacion-vii-campana-de-vacunacion-covid-19-v0709">http://www.salud.gob.hn/site/index.php/component/edocman/resumen-ejecutivo-ampliacion-vii-campana-de-vacunacion-covid-19-v0709</a><br><a href="http://www.salud.gob.hn/site/index.php/component/edocman/resumen-ejecutivo-ampliacion-vii-campana-de-vacunacion-covid-19-v0709">http://www.salud.gob.hn/site/index.php/component/edocman/resumen-ejecutivo-ampliacion-vii-campana-de-vacunacion-covid-19-v0709</a> |
| Jamaica   | Free    | 15+; 12-15 with underlying conditions | No data                                                                                                        | <a href="https://vaccination.moh.gov.jm/frequently-asked-questions/">https://vaccination.moh.gov.jm/frequently-asked-questions/</a>                                                                                                                                                                                                                                                                                                                                                                                                                        |
| Mexico    | Free    | 12+                                   | People with allergic reaction to vaccine component; people received blood transfusion or monoclonal antibodies | <a href="http://vacunacovid.gob.mx/wordpress/preguntas-frecuentes/">http://vacunacovid.gob.mx/wordpress/preguntas-frecuentes/</a>                                                                                                                                                                                                                                                                                                                                                                                                                          |
| Nicaragua | No data | No data                               | No data                                                                                                        |                                                                                                                                                                                                                                                                                                                                                                                                                                                                                                                                                            |
| Panama    | Free    | 12+                                   | No data                                                                                                        | <a href="http://www.minsa.gob.pa/noticia/traslado-de-insumos-y-personal-clave-en-la-estrategia-de-vacunacion-en-el-12-1">http://www.minsa.gob.pa/noticia/traslado-de-insumos-y-personal-clave-en-la-estrategia-de-vacunacion-en-el-12-1</a>                                                                                                                                                                                                                                                                                                                |
| Paraguay  | Free    | 18+                                   | No data                                                                                                        | <a href="https://www.gov.uk/foreign-travel-advice/paraguay/coronavirus">https://www.gov.uk/foreign-travel-advice/paraguay/coronavirus</a><br><a href="https://www.vacunate.gov.py/index-plan-vacunacion.html">https://www.vacunate.gov.py/index-plan-vacunacion.html</a>                                                                                                                                                                                                                                                                                   |
| Peru      | Free    | 18+; 12-18 with type III              | No data                                                                                                        | <a href="https://doh.gov.ph/vaccines/know-your-vaccines">https://doh.gov.ph/vaccines/know-your-vaccines</a>                                                                                                                                                                                                                                                                                                                                                                                                                                                |

|                                  |      |                                                                             |                                                                                             |                                                                                                                                                                                                                                                                                                                                                                                                                                                            |
|----------------------------------|------|-----------------------------------------------------------------------------|---------------------------------------------------------------------------------------------|------------------------------------------------------------------------------------------------------------------------------------------------------------------------------------------------------------------------------------------------------------------------------------------------------------------------------------------------------------------------------------------------------------------------------------------------------------|
|                                  |      | obesity, diabetes mellitus, cancer, Down syndrome, rare and orphan diseases |                                                                                             |                                                                                                                                                                                                                                                                                                                                                                                                                                                            |
| Saint Kitts and Nevis            | Free | 12+                                                                         | People who are allergic to substances in the vaccine; pregnant and breastfeeding women      | <a href="https://covid19.gov.kn/covid-19-vaccination/">https://covid19.gov.kn/covid-19-vaccination/</a><br><a href="https://www.sknis.gov.kn/2021/08/13/pfizer-covid-19-vaccines-will-offer-protection-to-the-federations-children-12-years-and-up-minister-of-health-byron-nisbett/">https://www.sknis.gov.kn/2021/08/13/pfizer-covid-19-vaccines-will-offer-protection-to-the-federations-children-12-years-and-up-minister-of-health-byron-nisbett/</a> |
| Saint Lucia                      | Free | 12+                                                                         | No data                                                                                     | <a href="https://suntci.com/people-in-st-lucia-can-now-register-online-for-covid-vaccine-p5886-135.htm">https://suntci.com/people-in-st-lucia-can-now-register-online-for-covid-vaccine-p5886-135.htm</a><br><a href="http://socialtransformation.govt.lc/news/covid-19-vaccination-update2">http://socialtransformation.govt.lc/news/covid-19-vaccination-update2</a>                                                                                     |
| Saint Vincent and the Grenadines | Free | No data                                                                     | No data                                                                                     | <a href="https://www.gov.uk/foreign-travel-advice/st-vincent-and-the-grenadines/coronavirus">https://www.gov.uk/foreign-travel-advice/st-vincent-and-the-grenadines/coronavirus</a>                                                                                                                                                                                                                                                                        |
| Suriname                         | Free | 18+                                                                         | People with proven severe allergies to any of the components of the vaccine; pregnant women | <a href="https://laatjevaccineren.st/vragen/#vaccineren">https://laatjevaccineren.st/vragen/#vaccineren</a>                                                                                                                                                                                                                                                                                                                                                |
| United States                    | Free | 12+                                                                         | People with allergic reactions to vaccine component                                         | <a href="https://www.fda.gov/media/144413/download">https://www.fda.gov/media/144413/download</a><br><a href="https://www.cdc.gov/coronavirus/2019-ncov/vaccines/different-vaccines/Pfizer-BioNTech.html">https://www.cdc.gov/coronavirus/2019-ncov/vaccines/different-vaccines/Pfizer-BioNTech.html</a>                                                                                                                                                   |
| Uruguay                          | Free | 12+                                                                         | People with allergic reactions to the first dose or vaccine component                       | <a href="https://www.gub.uy/ministerio-salud-publica/comunicacion/publicaciones/preguntas-frecuentes-vacunacion-covid-19/sobre-vacuna">https://www.gub.uy/ministerio-salud-publica/comunicacion/publicaciones/preguntas-frecuentes-vacunacion-covid-19/sobre-vacuna</a>                                                                                                                                                                                    |

|                              |         |                                                                                                                          |                                                                                                                                                       |                                                                                                                                                                                                                                                                                                                                                                                                                                                                                                                                                                                                                                                                                                                                                                                                                                                                                                                                              |
|------------------------------|---------|--------------------------------------------------------------------------------------------------------------------------|-------------------------------------------------------------------------------------------------------------------------------------------------------|----------------------------------------------------------------------------------------------------------------------------------------------------------------------------------------------------------------------------------------------------------------------------------------------------------------------------------------------------------------------------------------------------------------------------------------------------------------------------------------------------------------------------------------------------------------------------------------------------------------------------------------------------------------------------------------------------------------------------------------------------------------------------------------------------------------------------------------------------------------------------------------------------------------------------------------------|
|                              |         |                                                                                                                          |                                                                                                                                                       | s/casos-indicados                                                                                                                                                                                                                                                                                                                                                                                                                                                                                                                                                                                                                                                                                                                                                                                                                                                                                                                            |
| Venezuela                    | Free    | 18+                                                                                                                      | No data                                                                                                                                               | <a href="https://reporting.unhcr.org/sites/default/files/Panama%20operational%20update%20April%202021.pdf">https://reporting.unhcr.org/sites/default/files/Panama%20operational%20update%20April%202021.pdf</a>                                                                                                                                                                                                                                                                                                                                                                                                                                                                                                                                                                                                                                                                                                                              |
| Trinidad and Tobago          | Free    | 12+                                                                                                                      | People with allergic reactions to vaccine component                                                                                                   | <a href="https://health.gov.tt/covid-19/covid-19-vaccine/faqs">https://health.gov.tt/covid-19/covid-19-vaccine/faqs</a>                                                                                                                                                                                                                                                                                                                                                                                                                                                                                                                                                                                                                                                                                                                                                                                                                      |
| <b>Eastern Mediterranean</b> |         |                                                                                                                          |                                                                                                                                                       |                                                                                                                                                                                                                                                                                                                                                                                                                                                                                                                                                                                                                                                                                                                                                                                                                                                                                                                                              |
| Afghanistan                  | No data | 18+                                                                                                                      | No data                                                                                                                                               | <a href="https://www.adb.org/sites/default/files/linked-documents/55012-01-sd-03.pdf">https://www.adb.org/sites/default/files/linked-documents/55012-01-sd-03.pdf</a>                                                                                                                                                                                                                                                                                                                                                                                                                                                                                                                                                                                                                                                                                                                                                                        |
| Bahrain                      | Free    | 12+; 3-11 with respiratory diseases, heart diseases, diabetes mellitus, obesity, cancer, Down syndrome and birth defects | People should not have allergies to any of the vaccine's components; women should not be pregnant or planning on getting pregnant, or lactating women | <a href="https://healthalert.gov.bh/uploads/dhep3ew1_12l.pdf">https://healthalert.gov.bh/uploads/dhep3ew1_12l.pdf</a><br><a href="https://healthalert.gov.bh/uploads/sf3iuypu_oby.pdf">https://healthalert.gov.bh/uploads/sf3iuypu_oby.pdf</a><br><a href="https://www.cvdvaccine-bh.com/files/V6_6-2-Final-121120-EUA_Full-Prescribing-Info_HCP-Fact-Sheet-Pfizer-BioNTech-COVID-19-vaccine-14-1-2021.pdf">https://www.cvdvaccine-bh.com/files/V6_6-2-Final-121120-EUA_Full-Prescribing-Info_HCP-Fact-Sheet-Pfizer-BioNTech-COVID-19-vaccine-14-1-2021.pdf</a><br><a href="https://www.nhra.bh/Media/Announcement/MediaHandler/Generichandler/documents/Announcements/NHRA_News_MoH%20Circular_Inactivated%20COVID19%20Vaccine%20(Snopharm)_2021215n.pdf">https://www.nhra.bh/Media/Announcement/MediaHandler/Generichandler/documents/Announcements/NHRA_News_MoH%20Circular_Inactivated%20COVID19%20Vaccine%20(Snopharm)_2021215n.pdf</a> |
| Djibouti                     | No data | 18+                                                                                                                      | No data                                                                                                                                               | <a href="https://www.aa.com.tr/en/africa/djibouti-receives-more-covid-19-jabs-as-vaccination-drive-underway/2307470">https://www.aa.com.tr/en/africa/djibouti-receives-more-covid-19-jabs-as-vaccination-drive-underway/2307470</a>                                                                                                                                                                                                                                                                                                                                                                                                                                                                                                                                                                                                                                                                                                          |
| Egypt                        | Free    | 18+                                                                                                                      | No data                                                                                                                                               | <a href="https://www.egypttoday.com/Article/1/103826/Egyptians-non-Egyptians-receive-COVID-vaccine-for-free-Health-Ministry">https://www.egypttoday.com/Article/1/103826/Egyptians-non-Egyptians-receive-COVID-vaccine-for-free-Health-Ministry</a><br><a href="https://www.thenationalnews.com/mena/egypt-opens-vaccine-regi">https://www.thenationalnews.com/mena/egypt-opens-vaccine-regi</a>                                                                                                                                                                                                                                                                                                                                                                                                                                                                                                                                             |

|         |         |         |                                                                                                                                                                                                |                                                                                                                                                                                                                                                                                                                                                                                                                                                                                                                                                                                                                                                                                                     |
|---------|---------|---------|------------------------------------------------------------------------------------------------------------------------------------------------------------------------------------------------|-----------------------------------------------------------------------------------------------------------------------------------------------------------------------------------------------------------------------------------------------------------------------------------------------------------------------------------------------------------------------------------------------------------------------------------------------------------------------------------------------------------------------------------------------------------------------------------------------------------------------------------------------------------------------------------------------------|
|         |         |         |                                                                                                                                                                                                | stration-for-all-citizens-over-18-1.1186403                                                                                                                                                                                                                                                                                                                                                                                                                                                                                                                                                                                                                                                         |
| Iran    | No data | No data | No data                                                                                                                                                                                        |                                                                                                                                                                                                                                                                                                                                                                                                                                                                                                                                                                                                                                                                                                     |
| Iraq    | No data | 18+     | No data                                                                                                                                                                                        | <a href="https://www2.hse.ie/screening-and-vaccinations/covid-19-vaccine/get-the-vaccine/deciding-on-vaccination-for-12-to-15-year-olds/">https://www2.hse.ie/screening-and-vaccinations/covid-19-vaccine/get-the-vaccine/deciding-on-vaccination-for-12-to-15-year-olds/</a>                                                                                                                                                                                                                                                                                                                                                                                                                       |
| Jordan  | Free    | 12+     | People with allergic reactions to vaccine component, first dose, another vaccine; pregnant or breastfeeding women                                                                              | <a href="https://corona.moh.gov.jo/ar/page/1061/CoronaVaccineQuestions">https://corona.moh.gov.jo/ar/page/1061/CoronaVaccineQuestions</a>                                                                                                                                                                                                                                                                                                                                                                                                                                                                                                                                                           |
| Kuwait  | Free    | 12+     | No data                                                                                                                                                                                        | <a href="http://www.xinhuanet.com/english/2021-07/19/c_1310069039.htm">http://www.xinhuanet.com/english/2021-07/19/c_1310069039.htm</a>                                                                                                                                                                                                                                                                                                                                                                                                                                                                                                                                                             |
| Lebanon | Free    | 16+     | People with an anaphylactic shock after receiving a previous dose of this vaccine, or a severe allergic reaction to any component of this vaccine                                              | <a href="https://www.familyfirsthealth.org/lebanon-covid-19-vaccine-clinic">https://www.familyfirsthealth.org/lebanon-covid-19-vaccine-clinic</a><br><a href="https://www.moph.gov.lb/userfiles/files/Prevention/COVID-19%20Vaccine/COVID-19%20Vaccine%20FAQ%20-%20EN%20-22-3-%202021.pdf">https://www.moph.gov.lb/userfiles/files/Prevention/COVID-19%20Vaccine/COVID-19%20Vaccine%20FAQ%20-%20EN%20-22-3-%202021.pdf</a><br><a href="https://www.moph.gov.lb/userfiles/files/Prevention/COVID-19%20Vaccine/COVID-19%20Vaccine%20FAQ%20-%20EN%20-22-3-%202021.pdf">https://www.moph.gov.lb/userfiles/files/Prevention/COVID-19%20Vaccine/COVID-19%20Vaccine%20FAQ%20-%20EN%20-22-3-%202021.pdf</a> |
| Libya   | No data | 18+     | Pregnant and breastfeeding women                                                                                                                                                               | <a href="https://www.eservices.ly/">https://www.eservices.ly/</a>                                                                                                                                                                                                                                                                                                                                                                                                                                                                                                                                                                                                                                   |
| Morocco | Free    | 12+     | People with allergic reactions to vaccine component or the first dose; people allergic to other vaccine; pregnant or breastfeeding women; people with an infectious disease in the acute phase | <a href="https://www.africanews.com/2021/09/01/covid-19-morocco-begin-inoculating-children-over-12-years-old/">https://www.africanews.com/2021/09/01/covid-19-morocco-begin-inoculating-children-over-12-years-old/</a><br><a href="https://liqahcorona.ma/fr/page-je-minforme-sur-le-vaccin#209">https://liqahcorona.ma/fr/page-je-minforme-sur-le-vaccin#209</a><br><a href="https://liqahcorona.ma/fr/questions#faq">https://liqahcorona.ma/fr/questions#faq</a>                                                                                                                                                                                                                                 |

|              |      |     |                                                                      |                                                                                                                                                                                                                                                                                                                                                                                                                                                                            |
|--------------|------|-----|----------------------------------------------------------------------|----------------------------------------------------------------------------------------------------------------------------------------------------------------------------------------------------------------------------------------------------------------------------------------------------------------------------------------------------------------------------------------------------------------------------------------------------------------------------|
| Oman         | Free | 12+ | No data                                                              | <a href="https://www.thearabianstories.com/2021/08/15/covid-19-free-vaccination-begins-for-oman-expats-in-al-dhahirah-governorate-1/">https://www.thearabianstories.com/2021/08/15/covid-19-free-vaccination-begins-for-oman-expats-in-al-dhahirah-governorate-1/</a><br><a href="https://om.usembassy.gov/u-s-citizen-services/covid-19-information/">https://om.usembassy.gov/u-s-citizen-services/covid-19-information/</a>                                             |
| Pakistan     | Free | 12+ | No data                                                              | <a href="https://ncoc.gov.pk/covid-vaccination-en.php">https://ncoc.gov.pk/covid-vaccination-en.php</a>                                                                                                                                                                                                                                                                                                                                                                    |
| Qatar        | Free | 12+ | People with allergic reactions to vaccine component; pregnant women  | <a href="https://covid19.moph.gov.qa/EN/Covid19-Vaccine/Pages/FAQ.aspx">https://covid19.moph.gov.qa/EN/Covid19-Vaccine/Pages/FAQ.aspx</a>                                                                                                                                                                                                                                                                                                                                  |
| Saudi Arabia | Free | 12+ | People seriously infected with SARS-CoV-2                            | <a href="https://www.moh.gov.sa/en/eServices/Pages/Covid19-egistration.aspx">https://www.moh.gov.sa/en/eServices/Pages/Covid19-egistration.aspx</a><br><a href="https://articlesen.covid19awareness.sa/COVID-19-Vaccine-FAQs">https://articlesen.covid19awareness.sa/COVID-19-Vaccine-FAQs</a>                                                                                                                                                                             |
| Somalia      | Free | 18+ | No data                                                              | <a href="https://reliefweb.int/report/somalia/race-against-time-boost-covid-19-vaccine-uptake-somalia">https://reliefweb.int/report/somalia/race-against-time-boost-covid-19-vaccine-uptake-somalia</a>                                                                                                                                                                                                                                                                    |
| Sudan        | Free | 18+ | People with allergic reaction to the first dose; people with a fever | <a href="https://www.facebook.com/FMOH.SUDAN/posts/2986575494948742">https://www.facebook.com/FMOH.SUDAN/posts/2986575494948742</a><br><a href="https://www.unicef.org/sudan/stories/covid-19-vaccination-sudan">https://www.unicef.org/sudan/stories/covid-19-vaccination-sudan</a>                                                                                                                                                                                       |
| Syria        | Free | 18+ | No data                                                              | <a href="http://www.xinhuanet.com/english/2021-05/06/c_139926698.htm">http://www.xinhuanet.com/english/2021-05/06/c_139926698.htm</a><br><a href="http://www.emro.who.int/syria/news/update-on-covid-19-vaccination-in-syria-22-september-2021.html">http://www.emro.who.int/syria/news/update-on-covid-19-vaccination-in-syria-22-september-2021.html</a>                                                                                                                 |
| Tunisia      | Free | 18+ | No data                                                              | <a href="https://reliefweb.int/report/tunisia/tunisia-receives-first-batch-covid-19-vaccines-through-covax-facility">https://reliefweb.int/report/tunisia/tunisia-receives-first-batch-covid-19-vaccines-through-covax-facility</a><br><a href="https://reliefweb.int/report/tunisia/tunisia-receives-first-batch-covid-19-vaccines-through-covax-facility">https://reliefweb.int/report/tunisia/tunisia-receives-first-batch-covid-19-vaccines-through-covax-facility</a> |

|                      |      |         |                                                                                                                                                              |                                                                                                                                                                                                                                                                                                                                                                                                                                                                                                                                                            |
|----------------------|------|---------|--------------------------------------------------------------------------------------------------------------------------------------------------------------|------------------------------------------------------------------------------------------------------------------------------------------------------------------------------------------------------------------------------------------------------------------------------------------------------------------------------------------------------------------------------------------------------------------------------------------------------------------------------------------------------------------------------------------------------------|
| United Arab Emirates | Free | 3+      | People with allergic reactions to vaccine component; pregnant women                                                                                          | <a href="https://u.ae/en/information-and-services/justice-safety-and-the-law/handling-the-covid-19-outbreak/vaccines-against-covid-19-in-the-uae">https://u.ae/en/information-and-services/justice-safety-and-the-law/handling-the-covid-19-outbreak/vaccines-against-covid-19-in-the-uae</a> .<br><a href="https://www.wam.ae/en/details/1395302961623">https://www.wam.ae/en/details/1395302961623</a>                                                                                                                                                   |
| Yemen                | Free | No data | No data                                                                                                                                                      | <a href="https://www.thenationalnews.com/gulf-news/yemenis-urged-to-take-covid-19-vaccine-as-first-astrazeneca-shipment-arrives-1.1194914">https://www.thenationalnews.com/gulf-news/yemenis-urged-to-take-covid-19-vaccine-as-first-astrazeneca-shipment-arrives-1.1194914</a>                                                                                                                                                                                                                                                                            |
| <b>Europe</b>        |      |         |                                                                                                                                                              |                                                                                                                                                                                                                                                                                                                                                                                                                                                                                                                                                            |
| Albania              | Free | 18+     | No data                                                                                                                                                      | <a href="http://shendetesia.gov.al/fushata-e-vaksinimit-shqiperia-buzeqesh/">http://shendetesia.gov.al/fushata-e-vaksinimit-shqiperia-buzeqesh/</a>                                                                                                                                                                                                                                                                                                                                                                                                        |
| Andorra              | Free | 12+     | No data                                                                                                                                                      | <a href="https://www.salut.ad/preinscripcio-vacuna-covid19/">https://www.salut.ad/preinscripcio-vacuna-covid19/</a>                                                                                                                                                                                                                                                                                                                                                                                                                                        |
| Armenia              | Free | 18+     | If you have a history of severe allergic reactions to any ingredients of a COVID-19 vaccine; if you are currently sick or experiencing symptoms of COVID-19. | <a href="https://www.unicef.org/armenia/en/stories/everything-you-need-know-about-covid-19-vaccination-armenia#Question1">https://www.unicef.org/armenia/en/stories/everything-you-need-know-about-covid-19-vaccination-armenia#Question1</a>                                                                                                                                                                                                                                                                                                              |
| Austria              | Free | 12+     | Seriously allergic to first dose                                                                                                                             | <a href="https://www.sozialministerium.at/Corona-Schutzimpfung/Corona-Schutzimpfung---Fachinformationen.html">https://www.sozialministerium.at/Corona-Schutzimpfung/Corona-Schutzimpfung---Fachinformationen.html</a>                                                                                                                                                                                                                                                                                                                                      |
| Azerbaijan           | Free | 12+     | People with uncontrolled epilepsy; patients receiving immunosuppressive therapy; pregnant women                                                              | <a href="http://sehiyye.gov.az/xeberler/3418-azrbaycan-respublikasnn-shiyy-nazirliyi-cbari-tibbi-sorta-zr-dvlt-agentliyi-v-tibbi-razi-blmlrini-daretm-birliyinin-mlumati.html">http://sehiyye.gov.az/xeberler/3418-azrbaycan-respublikasnn-shiyy-nazirliyi-cbari-tibbi-sorta-zr-dvlt-agentliyi-v-tibbi-razi-blmlrini-daretm-birliyinin-mlumati.html</a><br><a href="http://health.gov.az/xeberler/3477-azrbaycan-respublikas-shiyy-nazirliyinin-mlumati.html">http://health.gov.az/xeberler/3477-azrbaycan-respublikas-shiyy-nazirliyinin-mlumati.html</a> |
| Belarus              | Free | 16+     | Immunosuppressive therapy                                                                                                                                    | <a href="https://cms.law/en/int/expert-guides/cms-expert-guide-to-vaccine-">https://cms.law/en/int/expert-guides/cms-expert-guide-to-vaccine-</a>                                                                                                                                                                                                                                                                                                                                                                                                          |



|                        |         |         |                                                                                                                |                                                                                                                                                                                                                                                                                                                                                                                                                                                                                                                                                |
|------------------------|---------|---------|----------------------------------------------------------------------------------------------------------------|------------------------------------------------------------------------------------------------------------------------------------------------------------------------------------------------------------------------------------------------------------------------------------------------------------------------------------------------------------------------------------------------------------------------------------------------------------------------------------------------------------------------------------------------|
|                        |         |         |                                                                                                                | <a href="https://compensation-regimes/belarus">compensation-regimes/belarus</a><br><a href="http://minzdrav.gov.by/ru/dlya-spetsialistov/rekomendatsii-po-vaktsinatsii-protiv-covid-19.php">http://minzdrav.gov.by/ru/dlya-spetsialistov/rekomendatsii-po-vaktsinatsii-protiv-covid-19.php</a>                                                                                                                                                                                                                                                 |
| Belgium                | Free    | 12+     | No data                                                                                                        | <a href="https://www.info-coronavirus.be/en/vaccination/#faq">https://www.info-coronavirus.be/en/vaccination/#faq</a>                                                                                                                                                                                                                                                                                                                                                                                                                          |
| Bosnia and Herzegovina | No data | No data | No data                                                                                                        |                                                                                                                                                                                                                                                                                                                                                                                                                                                                                                                                                |
| Bulgaria               | Free    | 12+     | People who have allergic reactions to vaccine component                                                        | <a href="https://btvnovinite.bg/bulgaria/vaksina-sreshtu-covid-19-za-decainteresat-ot-roditelite-zasega-e-plah.html?fbclid=IwAR20JTPCzPxeHkEHI7NARofgzgmHPmiuucuUrjbAGh7iWdCAnI7yl8CKxow">https://btvnovinite.bg/bulgaria/vaksina-sreshtu-covid-19-za-decainteresat-ot-roditelite-zasega-e-plah.html?fbclid=IwAR20JTPCzPxeHkEHI7NARofgzgmHPmiuucuUrjbAGh7iWdCAnI7yl8CKxow</a><br><a href="https://coronavirus.bg/bg/vaccinations/faq">https://coronavirus.bg/bg/vaccinations/faq</a>                                                           |
| Croatia                | Free    | 16+     | People with an immediate allergic reaction to any other vaccine or injection therapy                           | <a href="https://www.koronavirus.hr/o-covidu/892">https://www.koronavirus.hr/o-covidu/892</a><br><a href="https://www.koronavirus.hr">https://www.koronavirus.hr</a>                                                                                                                                                                                                                                                                                                                                                                           |
| Cyprus                 | No data | 12+     | No data                                                                                                        | <a href="https://www.pio.gov.cy/coronavirus/uploads/06092021_vaccination3doseEN.pdf">https://www.pio.gov.cy/coronavirus/uploads/06092021_vaccination3doseEN.pdf</a>                                                                                                                                                                                                                                                                                                                                                                            |
| Czechia                | Free    | 12+     | People with allergic reaction to vaccine component                                                             | <a href="https://covid.gov.cz/en/situations/information-about-vaccine/vaccine-indication-selected-cohorts">https://covid.gov.cz/en/situations/information-about-vaccine/vaccine-indication-selected-cohorts</a>                                                                                                                                                                                                                                                                                                                                |
| Denmark                | Free    | 12+     | People with a severe allergic reaction to the first shot or any ingredient of the vaccine; people with a fever | <a href="https://www.sst.dk/da/corona/Vaccination/Saadan-bliver-du-vaccineret">https://www.sst.dk/da/corona/Vaccination/Saadan-bliver-du-vaccineret</a><br><a href="https://www.sst.dk/-/media/Udgivelser/2021/Corona/Vaccination/Notater/Vidensbank-til-almen-praksis-og-vaccinationscentre.ashx?la=da&amp;hash=A5DF7E41671F7370E23EE58D9124B5935FA55">https://www.sst.dk/-/media/Udgivelser/2021/Corona/Vaccination/Notater/Vidensbank-til-almen-praksis-og-vaccinationscentre.ashx?la=da&amp;hash=A5DF7E41671F7370E23EE58D9124B5935FA55</a> |

|         |      |     |                                                                                                                                                                                                                                     | D3D                                                                                                                                                                                                                                                                                                                                                                                                                                                                                                                                                                                                                                                                                      |
|---------|------|-----|-------------------------------------------------------------------------------------------------------------------------------------------------------------------------------------------------------------------------------------|------------------------------------------------------------------------------------------------------------------------------------------------------------------------------------------------------------------------------------------------------------------------------------------------------------------------------------------------------------------------------------------------------------------------------------------------------------------------------------------------------------------------------------------------------------------------------------------------------------------------------------------------------------------------------------------|
| Estonia | Free | 12+ | People with a severe allergic reaction to the first shot or any ingredient of the vaccine; people with a fever; people suffering from severe frailty syndrome, are in a very bad general condition or nearing the end of their life | <a href="https://www.kriis.ee/en/vaccination-plan-and-risk-groups">https://www.kriis.ee/en/vaccination-plan-and-risk-groups</a><br><a href="https://kkk.kriis.ee/en/faq/covid-19-vaccination/vaccination-plan-and-risk-groups">https://kkk.kriis.ee/en/faq/covid-19-vaccination/vaccination-plan-and-risk-groups</a>                                                                                                                                                                                                                                                                                                                                                                     |
| Finland | Free | 12+ | People with allergic reactions to the first dose or vaccine component                                                                                                                                                               | <a href="https://thl.fi/fi/web/infektioaudit-ja-rokotukset/rokotteet-a-o/koronavirusrokotteet-eli-covid-19-rokotteet-ohjeita-ammattilaisille">https://thl.fi/fi/web/infektioaudit-ja-rokotukset/rokotteet-a-o/koronavirusrokotteet-eli-covid-19-rokotteet-ohjeita-ammattilaisille</a><br><a href="https://thl.fi/en/web/infectious-diseases-and-vaccinations/what-s-new/coronavirus-covid-19-latest-updates/vaccines-and-coronaviruses/suitability-of-covid-19-vaccines-for-various-groups">https://thl.fi/en/web/infectious-diseases-and-vaccinations/what-s-new/coronavirus-covid-19-latest-updates/vaccines-and-coronaviruses/suitability-of-covid-19-vaccines-for-various-groups</a> |
| France  | Free | 12+ | People with allergic reactions to the first dose or vaccine component; people with thrombocytopenia and coagulation disorders, Capillary leak syndrome; 12-17 with developed pediatric multisystem inflammatory syndrome            | <a href="https://vaccination-info-service.fr/Les-maladies-et-leurs-vaccins/COVID-19">https://vaccination-info-service.fr/Les-maladies-et-leurs-vaccins/COVID-19</a>                                                                                                                                                                                                                                                                                                                                                                                                                                                                                                                      |
| Georgia | Free | 18+ | Pregnant women                                                                                                                                                                                                                      | <a href="https://www.provax.ge/Content/files/en_Vaccination_plan.pdf">https://www.provax.ge/Content/files/en_Vaccination_plan.pdf</a><br><a href="https://www.provax.ge/en/">https://www.provax.ge/en/</a>                                                                                                                                                                                                                                                                                                                                                                                                                                                                               |
| Germany | Free | 12+ | People with allergies to components of the COVID-19 vaccines; people with a fever                                                                                                                                                   | <a href="https://www.bundesgesundheitsministerium.de/coronavirus/faq-covid-19-impfung.html#c21988">https://www.bundesgesundheitsministerium.de/coronavirus/faq-covid-19-impfung.html#c21988</a><br><a href="https://www.rki.de/SharedDocs/FAQ/COVID-Impfen/gesamt.html">https://www.rki.de/SharedDocs/FAQ/COVID-Impfen/gesamt.html</a>                                                                                                                                                                                                                                                                                                                                                   |

|            |      |     |                                                                                           |                                                                                                                                                                                                                                                                                                                                                                                                                                                                                                                                       |
|------------|------|-----|-------------------------------------------------------------------------------------------|---------------------------------------------------------------------------------------------------------------------------------------------------------------------------------------------------------------------------------------------------------------------------------------------------------------------------------------------------------------------------------------------------------------------------------------------------------------------------------------------------------------------------------------|
| Greece     | Free | 12+ | People with a severe allergic reaction to the first shot or any ingredient of the vaccine | People with a severe allergic reaction to the first shot or any ingredient of the vaccine                                                                                                                                                                                                                                                                                                                                                                                                                                             |
| Hungary    | Free | 12+ | No data                                                                                   | <a href="https://koronavirus.gov.hu/gyik">https://koronavirus.gov.hu/gyik</a><br><a href="https://www.nnk.gov.hu/index.php/koronavirus-tajekoztato/936-gyakori-kerdesek-valaszok-a-vakcinarol-pfizer-biontech-vakcina">https://www.nnk.gov.hu/index.php/koronavirus-tajekoztato/936-gyakori-kerdesek-valaszok-a-vakcinarol-pfizer-biontech-vakcina</a><br><a href="http://www.xinhuanet.com/english/europe/2021-06/11/c_1310001374.htm">http://www.xinhuanet.com/english/europe/2021-06/11/c_1310001374.htm</a>                       |
| Iceland    | Free | 12+ | People with a history of severe allergies                                                 | <a href="https://www.lyfjastofnun.is/frettir/bolusetning-barna-og-unglinga-12-15-ara/">https://www.lyfjastofnun.is/frettir/bolusetning-barna-og-unglinga-12-15-ara/</a><br><a href="https://www.lyfjastofnun.is/covid-19/comirnaty-biontech-pfizer-2/">https://www.lyfjastofnun.is/covid-19/comirnaty-biontech-pfizer-2/</a><br><a href="https://www.landlaeknir.is/um-embattid/greinar/grein/item44019/vaccination-against-covid-19">https://www.landlaeknir.is/um-embattid/greinar/grein/item44019/vaccination-against-covid-19</a> |
| Ireland    | Free | 12+ | No data                                                                                   | <a href="https://www2.hse.ie/screening-and-vaccinations/covid-19-vaccine/get-the-vaccine/deciding-on-vaccination-for-12-to-15-year-olds/">https://www2.hse.ie/screening-and-vaccinations/covid-19-vaccine/get-the-vaccine/deciding-on-vaccination-for-12-to-15-year-olds/</a>                                                                                                                                                                                                                                                         |
| Israel     | Free | 12+ | People with serious allergic reactions; people with a fever                               | <a href="https://govextra.gov.il/ministry-of-health/covid19-vaccine/en-covid19-vaccination-information/">https://govextra.gov.il/ministry-of-health/covid19-vaccine/en-covid19-vaccination-information/</a>                                                                                                                                                                                                                                                                                                                           |
| Italy      | Free | 12+ | People with allergic reactions to the first dose                                          | <a href="https://www.aifa.gov.it/en/domande-e-risposte-su-vaccini-covid-19">https://www.aifa.gov.it/en/domande-e-risposte-su-vaccini-covid-19</a>                                                                                                                                                                                                                                                                                                                                                                                     |
| Kazakhstan | Free | 12+ | No data                                                                                   | <a href="https://egov.kz/cms/en/articles/health_care/Vakcinaciya-protiv-koronavirusnoy-infekcii-">https://egov.kz/cms/en/articles/health_care/Vakcinaciya-protiv-koronavirusnoy-infekcii-</a><br><a href="https://primeminister.kz/en/news/press/deti-ot-12-let-i-starshe-sm">https://primeminister.kz/en/news/press/deti-ot-12-let-i-starshe-sm</a>                                                                                                                                                                                  |

|             |      |     |                                                                                                                                                                                |                                                                                                                                                                                                                                                                                                                                                                                                                                                                      |
|-------------|------|-----|--------------------------------------------------------------------------------------------------------------------------------------------------------------------------------|----------------------------------------------------------------------------------------------------------------------------------------------------------------------------------------------------------------------------------------------------------------------------------------------------------------------------------------------------------------------------------------------------------------------------------------------------------------------|
|             |      |     |                                                                                                                                                                                | ogut-poluchit-vakcinu-pfizer-tolko-na-dobrovolnoy-osnove-i-s-so glasiya-roditeley-a-coy-2782049                                                                                                                                                                                                                                                                                                                                                                      |
| Kyrgyzstan  | Free | 18+ | People with allergic reaction to vaccine component; people with a fever; people with an acute attack of chronic disease; people with epilepsy; pregnant or breastfeeding women | <a href="http://med.kg/ru/novosti/5345-kak-zashchitit-lyudej-s-osobymi-potrebnostyami-ot-sovid-19-delat-li-vaktsinatsiyu.html">http://med.kg/ru/novosti/5345-kak-zashchitit-lyudej-s-osobymi-potrebnostyami-ot-sovid-19-delat-li-vaktsinatsiyu.html</a><br><a href="http://med.kg/ru/vaktsinatsiya/5037-vaktsinatsiya-lits-s-nevrologicheskim-zabolevaniyami.html">http://med.kg/ru/vaktsinatsiya/5037-vaktsinatsiya-lits-s-nevrologicheskim-zabolevaniyami.html</a> |
| Latvia      | Free | 12+ | People with a severe allergic reaction in the past after receiving other vaccines or medications                                                                               | <a href="https://www.spkc.gov.lv/lv/manavakcinalv">https://www.spkc.gov.lv/lv/manavakcinalv</a><br><a href="https://www.spkc.gov.lv/lv/visparigi-jautajumi-par-vakcinam">https://www.spkc.gov.lv/lv/visparigi-jautajumi-par-vakcinam</a>                                                                                                                                                                                                                             |
| Lithuania   | Free | 12+ | People with a fever                                                                                                                                                            | <a href="https://koronastop.lrv.lt/lt/duk/vakcinacija-nuo-covid-19/vakcinacija-nuo-12-metu-amziaus">https://koronastop.lrv.lt/lt/duk/vakcinacija-nuo-covid-19/vakcinacija-nuo-12-metu-amziaus</a>                                                                                                                                                                                                                                                                    |
| Luxembourg  | Free | 12+ | No data                                                                                                                                                                        | <a href="https://covid19.public.lu/fr/vaccination/infovaxx.html">https://covid19.public.lu/fr/vaccination/infovaxx.html</a>                                                                                                                                                                                                                                                                                                                                          |
| Malta       | Free | 12+ | People with a history of serious allergy (anaphylaxis) following a vaccine or injectable medication                                                                            | <a href="https://deputyprimeminister.gov.mt/en/health-promotion/covid-19/Pages/frequently-asked-questions.aspx">https://deputyprimeminister.gov.mt/en/health-promotion/covid-19/Pages/frequently-asked-questions.aspx</a><br><a href="https://deputyprimeminister.gov.mt/en/health-promotion/covid-19/Pages/travel.aspx">https://deputyprimeminister.gov.mt/en/health-promotion/covid-19/Pages/travel.aspx</a>                                                       |
| Moldova     | Free | 18+ | No data                                                                                                                                                                        | <a href="http://vaccinare.gov.md/permitted-vaccines">http://vaccinare.gov.md/permitted-vaccines</a>                                                                                                                                                                                                                                                                                                                                                                  |
| Monaco      | Free | 12+ | No data                                                                                                                                                                        | <a href="https://covid19.mc/en/fight-against-coronavirus/vaccination/qui-peut-se-faire-vacciner-contre-la-covid19/">https://covid19.mc/en/fight-against-coronavirus/vaccination/qui-peut-se-faire-vacciner-contre-la-covid19/</a><br><a href="https://covid19.mc/lutter-contre-la-covid-19/vaccination/">https://covid19.mc/lutter-contre-la-covid-19/vaccination/</a>                                                                                               |
| Montenegro  | Free | 12+ | No data                                                                                                                                                                        | <a href="https://www.covidodgovor.me/me/cesta-pitanja">https://www.covidodgovor.me/me/cesta-pitanja</a>                                                                                                                                                                                                                                                                                                                                                              |
| Netherlands | Free | 12+ | No data                                                                                                                                                                        | <a href="https://www.government.nl/topics/coronavirus-covid-19/dutch-vaccination-programme">https://www.government.nl/topics/coronavirus-covid-19/dutch-vaccination-programme</a>                                                                                                                                                                                                                                                                                    |

|                 |      |     |                                                                                                                                                           |                                                                                                                                                                                                                                                                                                                                                                                                                                                                         |
|-----------------|------|-----|-----------------------------------------------------------------------------------------------------------------------------------------------------------|-------------------------------------------------------------------------------------------------------------------------------------------------------------------------------------------------------------------------------------------------------------------------------------------------------------------------------------------------------------------------------------------------------------------------------------------------------------------------|
| North Macedonia | Free | 12+ | No data                                                                                                                                                   | <a href="http://zdravstvo.gov.mk/sq/jane-aplikuar-1-435-392-doza-te-vakines-ndersa-jane-rivaksinuar-667-739-qytetare/">http://zdravstvo.gov.mk/sq/jane-aplikuar-1-435-392-doza-te-vakines-ndersa-jane-rivaksinuar-667-739-qytetare/</a>                                                                                                                                                                                                                                 |
| Norway          | Free | 12+ | People with allergic reactions to the first dose; people with a fever                                                                                     | <a href="https://www.fhi.no/publ/brev/informasjonsbrev-09.09.2021---gjenomforing-av-vaksinasjon-med-3.-dose/">https://www.fhi.no/publ/brev/informasjonsbrev-09.09.2021---gjenomforing-av-vaksinasjon-med-3.-dose/</a>                                                                                                                                                                                                                                                   |
| Poland          | Free | 12+ | People with allergic reactions to the first dose or vaccine component; people with immunodeficiency; pregnant or breastfeeding women                      | <a href="https://www.gov.pl/web/szczepimysie/narodowy-program-szczepien-przeciw-covid-19">https://www.gov.pl/web/szczepimysie/narodowy-program-szczepien-przeciw-covid-19</a><br><a href="https://www.gov.pl/web/szczepimysie/jak-sie--zaszczepic">https://www.gov.pl/web/szczepimysie/jak-sie--zaszczepic</a><br><a href="https://www.gov.pl/web/szczepimysie/pytania-i-odpowiedzi">https://www.gov.pl/web/szczepimysie/pytania-i-odpowiedzi</a>                       |
| Portugal        | Free | 12+ | No data                                                                                                                                                   | <a href="https://covid19.min-saude.pt/perguntas-frequentes/">https://covid19.min-saude.pt/perguntas-frequentes/</a><br><a href="https://covid19.min-saude.pt/pedido-de-agendamento/">https://covid19.min-saude.pt/pedido-de-agendamento/</a><br><a href="https://covid19.min-saude.pt/meta-alcancada-85-da-populacao-te-m-a-vacinacao-completa/">https://covid19.min-saude.pt/meta-alcancada-85-da-populacao-te-m-a-vacinacao-completa/</a>                             |
| Romania         | Free | 12+ | No data                                                                                                                                                   | <a href="https://vaccinare-covid.gov.ro/vaccinuri-autorizate/">https://vaccinare-covid.gov.ro/vaccinuri-autorizate/</a><br><a href="https://apnews.com/article/europe-romania-coronavirus-pandemic-health-eed443fc19c966e9b07f7b14cf88c830">https://apnews.com/article/europe-romania-coronavirus-pandemic-health-eed443fc19c966e9b07f7b14cf88c830</a>                                                                                                                  |
| Russia          | Free | 18+ | People with allergic reaction to vaccine component; people with a fever; people with an acute attack of chronic diseases; pregnant or breastfeeding women | <a href="https://static-0.minzdrav.gov.ru/system/attachments/attaches/000/054/706/original/%D0%9E%D1%82%D0%B2%D0%B5%D1%82%D1%8B_%D0%BF%D0%BE_%D0%B2%D0%B0%D0%BA%D1%86%D0%B8%D0%BD%D0%B0%D1%86%D0%B8%D0%B8_COVID_19-19.02.2021-Red.pdf">https://static-0.minzdrav.gov.ru/system/attachments/attaches/000/054/706/original/%D0%9E%D1%82%D0%B2%D0%B5%D1%82%D1%8B_%D0%BF%D0%BE_%D0%B2%D0%B0%D0%BA%D1%86%D0%B8%D0%BD%D0%B0%D1%86%D0%B8%D0%B8_COVID_19-19.02.2021-Red.pdf</a> |
| San Marino      | Free | 12+ | People with allergic reaction;<br>People taking anticoagulant therapy                                                                                     | <a href="https://vaccinocovid.iss.sm/faq">https://vaccinocovid.iss.sm/faq</a><br><a href="https://vaccinocovid.iss.sm/vaccinazione-anticovi-fascia%2012-1">https://vaccinocovid.iss.sm/vaccinazione-anticovi-fascia%2012-1</a>                                                                                                                                                                                                                                          |

|             |      |     |                                                                                                                                                                                     |                                                                                                                                                                                                                                                                                                                                                                                                                                                                                                                                                                                                                                                                                  |
|-------------|------|-----|-------------------------------------------------------------------------------------------------------------------------------------------------------------------------------------|----------------------------------------------------------------------------------------------------------------------------------------------------------------------------------------------------------------------------------------------------------------------------------------------------------------------------------------------------------------------------------------------------------------------------------------------------------------------------------------------------------------------------------------------------------------------------------------------------------------------------------------------------------------------------------|
|             |      |     |                                                                                                                                                                                     | 5%20anni                                                                                                                                                                                                                                                                                                                                                                                                                                                                                                                                                                                                                                                                         |
| Serbia      | Free | 12+ | People with fever                                                                                                                                                                   | <a href="https://www.france24.com/en/video/20210326-go-to-serbia-for-a-free-covid-vaccine-country-offers-jabs-to-foreigners">https://www.france24.com/en/video/20210326-go-to-serbia-for-a-free-covid-vaccine-country-offers-jabs-to-foreigners</a><br><a href="https://vakcinacija.gov.rs/vaccine-protiv-covid-19-u-srbiji/">https://vakcinacija.gov.rs/vaccine-protiv-covid-19-u-srbiji/</a><br><a href="https://borgenproject.org/covid-19-vaccinations-in-serbia/">https://borgenproject.org/covid-19-vaccinations-in-serbia/</a><br><a href="https://vakcinacija.gov.rs/vaccine-protiv-covid-19-u-srbiji/">https://vakcinacija.gov.rs/vaccine-protiv-covid-19-u-srbiji/</a> |
| Slovakia    | Free | 12+ | No data                                                                                                                                                                             | <a href="https://www.slovenskoproticovidu.sk/sk/vsetko-o-ockovani/vakciny/viac-o-vaccine-comirnaty-od-vyrobcov-pfizer-biontech">https://www.slovenskoproticovidu.sk/sk/vsetko-o-ockovani/vakciny/viac-o-vaccine-comirnaty-od-vyrobcov-pfizer-biontech</a>                                                                                                                                                                                                                                                                                                                                                                                                                        |
| Slovenia    | Free | 12+ | People with severe allergy to the ingredients of the vaccine; people with a fever; people with thrombosis syndrome with thrombocytopenia after the first vaccination with Vaxzevria | <a href="https://www.nijz.si/sites/www.nijz.si/files/uploaded/priporocila_za_cepljenje_protiv_covid_uskl_psc_apr_2021.pdf">https://www.nijz.si/sites/www.nijz.si/files/uploaded/priporocila_za_cepljenje_protiv_covid_uskl_psc_apr_2021.pdf</a><br><a href="https://www.cepimose.si/cepljenje-protiv-covidu-19/pogosta-vprasanja-in-odgovori/">https://www.cepimose.si/cepljenje-protiv-covidu-19/pogosta-vprasanja-in-odgovori/</a>                                                                                                                                                                                                                                             |
| Spain       | Free | 12+ | People with a history of having had severe allergic reactions (e.g., anaphylaxis) to any component of the vaccine                                                                   | <a href="https://www.vacunacovid.gob.es/preguntas-y-respuestas/deben-vacunarse-los-ninos-y-las-ninas-y-la-poblacion-adolescente">https://www.vacunacovid.gob.es/preguntas-y-respuestas/deben-vacunarse-los-ninos-y-las-ninas-y-la-poblacion-adolescente</a><br><a href="https://www.vacunacovid.gob.es/preguntas-y-respuestas">https://www.vacunacovid.gob.es/preguntas-y-respuestas</a>                                                                                                                                                                                                                                                                                         |
| Sweden      | Free | 12+ | No data                                                                                                                                                                             | <a href="https://www.folkhalsomyndigheten.se/smittskydd-beredskap/utbrott/aktuella-utbrott/covid-19/vaccination-mot-covid-19/fragor-och-svar-om-vaccination-mot-covid-19/">https://www.folkhalsomyndigheten.se/smittskydd-beredskap/utbrott/aktuella-utbrott/covid-19/vaccination-mot-covid-19/fragor-och-svar-om-vaccination-mot-covid-19/</a><br><a href="https://www.1177.se/en/other-languages/other-languages/covid-19/vaccin-engelska/#section-133829">https://www.1177.se/en/other-languages/other-languages/covid-19/vaccin-engelska/#section-133829</a>                                                                                                                 |
| Switzerland | Free | 12+ | No data                                                                                                                                                                             | <a href="https://www.swissmedicinfo.ch/ShowText.aspx?textType=FI&amp;lang=DE&amp;authNr=68225">https://www.swissmedicinfo.ch/ShowText.aspx?textType=FI&amp;lang=DE&amp;authNr=68225</a>                                                                                                                                                                                                                                                                                                                                                                                                                                                                                          |

|              |      |     |                                                                                                                               |                                                                                                                                                                                                                                                                                                                                                                                                                                                                                                                                                                                                                                                                                                                                                                                                                                                                                                                                                                                                    |
|--------------|------|-----|-------------------------------------------------------------------------------------------------------------------------------|----------------------------------------------------------------------------------------------------------------------------------------------------------------------------------------------------------------------------------------------------------------------------------------------------------------------------------------------------------------------------------------------------------------------------------------------------------------------------------------------------------------------------------------------------------------------------------------------------------------------------------------------------------------------------------------------------------------------------------------------------------------------------------------------------------------------------------------------------------------------------------------------------------------------------------------------------------------------------------------------------|
| Tajikistan   | Free | 18+ | No data                                                                                                                       | <a href="https://apa.az/en/xeber/cis-countries-news/tajikistan-declares-mandatory-covid-19-vaccination-353147">https://apa.az/en/xeber/cis-countries-news/tajikistan-declares-mandatory-covid-19-vaccination-353147</a><br><a href="https://eurasianet.org/dashboard-vaccinating-eurasia-june">https://eurasianet.org/dashboard-vaccinating-eurasia-june</a>                                                                                                                                                                                                                                                                                                                                                                                                                                                                                                                                                                                                                                       |
| Turkey       | Free | 12+ | People with allergic reactions to the first dose or vaccine component                                                         | <a href="https://covid19asi.saglik.gov.tr/EN-78316/frequently-asked-questions.html">https://covid19asi.saglik.gov.tr/EN-78316/frequently-asked-questions.html</a><br><a href="https://www.hurriyetdailynews.com/erdogan-urges-parents-teachers-to-get-covid-19-vaccine-167672">https://www.hurriyetdailynews.com/erdogan-urges-parents-teachers-to-get-covid-19-vaccine-167672</a><br><a href="https://www.dailysabah.com/turkey/turkey-lowers-covid-19-vaccination-age-to-15-starts-fourth-doses/news">https://www.dailysabah.com/turkey/turkey-lowers-covid-19-vaccination-age-to-15-starts-fourth-doses/news</a>                                                                                                                                                                                                                                                                                                                                                                                |
| Turkmenistan | Free | 18+ | No data                                                                                                                       | <a href="https://tdh.gov.tm/en/post/25815/objectives-of-increasing-national-health-system%E2%80%99s-potential-discussed">https://tdh.gov.tm/en/post/25815/objectives-of-increasing-national-health-system%E2%80%99s-potential-discussed</a><br><a href="https://www.barrons.com/news/uzbekistan-certifies-russia-s-sputnik-vaccine-for-mass-use-01613559912">https://www.barrons.com/news/uzbekistan-certifies-russia-s-sputnik-vaccine-for-mass-use-01613559912</a><br><a href="https://www.garda.com/crisis24/news-alerts/508931/turkmenistan-authorities-tighten-covid-19-countermeasures-in-ashgabat-as-of-aug-2-update-16">https://www.garda.com/crisis24/news-alerts/508931/turkmenistan-authorities-tighten-covid-19-countermeasures-in-ashgabat-as-of-aug-2-update-16</a><br><a href="https://tdh.gov.tm/en/post/25911/turkmenistan-registers-vaccines-prevention-infectious-diseases">https://tdh.gov.tm/en/post/25911/turkmenistan-registers-vaccines-prevention-infectious-diseases</a> |
| Ukraine      | Free | 12+ | People with any contraindications or allergies to any vaccine; people with an acute illness and body temperature above 38.5°C | <a href="https://vaccination.covid19.gov.ua/faq">https://vaccination.covid19.gov.ua/faq</a><br><a href="https://www.kyivpost.com/ukraine-politics/ukraine-allows-children-over-12-to-be-vaccinated-with-pfizer.html">https://www.kyivpost.com/ukraine-politics/ukraine-allows-children-over-12-to-be-vaccinated-with-pfizer.html</a>                                                                                                                                                                                                                                                                                                                                                                                                                                                                                                                                                                                                                                                               |
| United       | Free | 12+ | No data                                                                                                                       | <a href="https://www.gov.uk/government/publications/regulatory-approval">https://www.gov.uk/government/publications/regulatory-approval</a>                                                                                                                                                                                                                                                                                                                                                                                                                                                                                                                                                                                                                                                                                                                                                                                                                                                        |

|                        |         |                  |                                                                                                                                                        |                                                                                                                                                                                                                                                                                                                                                       |
|------------------------|---------|------------------|--------------------------------------------------------------------------------------------------------------------------------------------------------|-------------------------------------------------------------------------------------------------------------------------------------------------------------------------------------------------------------------------------------------------------------------------------------------------------------------------------------------------------|
| Kingdom                |         |                  |                                                                                                                                                        | -of-pfizer-biontech-vaccine-for-covid-19/information-for-uk-recipients-on-pfizerbiontech-covid-19-vaccine                                                                                                                                                                                                                                             |
| Uzbekistan             | Free    | No data          | No data                                                                                                                                                |                                                                                                                                                                                                                                                                                                                                                       |
| <b>South-East Asia</b> |         |                  |                                                                                                                                                        |                                                                                                                                                                                                                                                                                                                                                       |
| Bangladesh             | No data | 18+              | No data                                                                                                                                                | <a href="https://www.facebook.com/opmbs/posts/from-the-statement-the-astrozeneca-vaccine-will-be-administered-to-eligible-baha/762781414443838/">https://www.facebook.com/opmbs/posts/from-the-statement-the-astrozeneca-vaccine-will-be-administered-to-eligible-baha/762781414443838/</a>                                                           |
| Bhutan                 | No data | 12+              | People with a severe allergic reaction to the first shot or any ingredient of the vaccine; pregnant or breastfeeding women                             | <a href="https://drive.google.com/file/d/1UMlrII-HvD5x1q99NH50LoMP-_qjaIA/view">https://drive.google.com/file/d/1UMlrII-HvD5x1q99NH50LoMP-_qjaIA/view</a><br><a href="https://www.gov.bt/covid19/03-03-21-information-series-on-covid-19-vaccines-moh/">https://www.gov.bt/covid19/03-03-21-information-series-on-covid-19-vaccines-moh/</a>          |
| India                  | Free    | 18+              | People with a severe allergic reaction to the first shot or any ingredient of the vaccine; pregnant or breastfeeding women; people with severe illness | <a href="https://www.mohfw.gov.in/vaccinationbooklet/#page/1">https://www.mohfw.gov.in/vaccinationbooklet/#page/1</a><br><a href="https://www.mohfw.gov.in/covid_vaccination/vaccination/faqs.html#about-the-vaccine">https://www.mohfw.gov.in/covid_vaccination/vaccination/faqs.html#about-the-vaccine</a>                                          |
| Indonesia              | Free    | 12+              | No data                                                                                                                                                | <a href="https://www.kemkes.go.id/article/view/21070200001/phase-3-vaccination-begins-targeting-vulnerable-communities-and-children-of-12-17-years-old.html">https://www.kemkes.go.id/article/view/21070200001/phase-3-vaccination-begins-targeting-vulnerable-communities-and-children-of-12-17-years-old.html</a>                                   |
| Maldives               | Free    | 12+              | People with a fever                                                                                                                                    | <a href="http://health.gov.mv/Uploads/Downloads//Informations/Informations(362).pdf">http://health.gov.mv/Uploads/Downloads//Informations/Informations(362).pdf</a><br><a href="https://covid19.health.gov.mv/vaccination/?c=0">https://covid19.health.gov.mv/vaccination/?c=0</a><br><a href="https://raajje.mv/104861">https://raajje.mv/104861</a> |
| Myanmar                | Free    | 55+; people with | No data                                                                                                                                                | <a href="https://www.mohs.gov.mm/page/17483">https://www.mohs.gov.mm/page/17483</a>                                                                                                                                                                                                                                                                   |



|             |         |                                                                                                                                                                                     |         |                                                                                                                                                                                                                                                                                                                                                                                                                                                                                                                                                    |
|-------------|---------|-------------------------------------------------------------------------------------------------------------------------------------------------------------------------------------|---------|----------------------------------------------------------------------------------------------------------------------------------------------------------------------------------------------------------------------------------------------------------------------------------------------------------------------------------------------------------------------------------------------------------------------------------------------------------------------------------------------------------------------------------------------------|
|             |         | disabilities; members of the armed groups and their families from ethnic armed groups; displaced communities and temporary communities; persons with chronic and incurable diseases |         |                                                                                                                                                                                                                                                                                                                                                                                                                                                                                                                                                    |
| Nepal       | Free    | 18+                                                                                                                                                                                 | No data | <a href="https://reliefweb.int/sites/reliefweb.int/files/resources/Focused%20COVID-19_Media%20Monitoring_September%202020%2C%202021.pdf">https://reliefweb.int/sites/reliefweb.int/files/resources/Focused%20COVID-19_Media%20Monitoring_September%202020%2C%202021.pdf</a>                                                                                                                                                                                                                                                                        |
| North Korea | No data | No data                                                                                                                                                                             | No data |                                                                                                                                                                                                                                                                                                                                                                                                                                                                                                                                                    |
| Sri Lanka   | Free    | 12+                                                                                                                                                                                 | No data | <a href="http://www.epid.gov.lk/web/index.php?option=com_content&amp;view=article&amp;id=131:topics-recent&amp;Itemid=487&amp;lang=en">http://www.epid.gov.lk/web/index.php?option=com_content&amp;view=article&amp;id=131:topics-recent&amp;Itemid=487&amp;lang=en</a><br><a href="http://www.epid.gov.lk/web/index.php?option=com_content&amp;view=article&amp;id=131:topics-recent&amp;Itemid=487&amp;lang=en">http://www.epid.gov.lk/web/index.php?option=com_content&amp;view=article&amp;id=131:topics-recent&amp;Itemid=487&amp;lang=en</a> |
| Thailand    | Free    | 12+                                                                                                                                                                                 | No data | <a href="https://thainews.prd.go.th/en/news/detail/TCATG210727104313781">https://thainews.prd.go.th/en/news/detail/TCATG210727104313781</a><br><a href="https://www.bangkokpost.com/thailand/general/2180323/students-aged-12-18-to-get-pfizer-jabs-later-this-month">https://www.bangkokpost.com/thailand/general/2180323/students-aged-12-18-to-get-pfizer-jabs-later-this-month</a>                                                                                                                                                             |
| Timor-Leste | Free    | 18+                                                                                                                                                                                 | No data | <a href="https://reliefweb.int/report/timor-leste/timor-leste-launches-covid-">https://reliefweb.int/report/timor-leste/timor-leste-launches-covid-</a>                                                                                                                                                                                                                                                                                                                                                                                            |

|                        |      |     |                                                                                                                                                                                                                                                                                                              |                                                                                                                                                                                                                                                                                                                                                                                                                                                                                                                                                                                                                                                                                                                                 |
|------------------------|------|-----|--------------------------------------------------------------------------------------------------------------------------------------------------------------------------------------------------------------------------------------------------------------------------------------------------------------|---------------------------------------------------------------------------------------------------------------------------------------------------------------------------------------------------------------------------------------------------------------------------------------------------------------------------------------------------------------------------------------------------------------------------------------------------------------------------------------------------------------------------------------------------------------------------------------------------------------------------------------------------------------------------------------------------------------------------------|
|                        |      |     |                                                                                                                                                                                                                                                                                                              | 19-vaccination-campaign                                                                                                                                                                                                                                                                                                                                                                                                                                                                                                                                                                                                                                                                                                         |
| <b>Western Pacific</b> |      |     |                                                                                                                                                                                                                                                                                                              |                                                                                                                                                                                                                                                                                                                                                                                                                                                                                                                                                                                                                                                                                                                                 |
| Australia              | Free | 12+ | No data                                                                                                                                                                                                                                                                                                      | <a href="https://www.health.gov.au/initiatives-and-programs/covid-19-vaccines/getting-vaccinated-for-covid-19">https://www.health.gov.au/initiatives-and-programs/covid-19-vaccines/getting-vaccinated-for-covid-19</a>                                                                                                                                                                                                                                                                                                                                                                                                                                                                                                         |
| Brunei                 | Free | 12+ | No data                                                                                                                                                                                                                                                                                                      | <a href="http://www.moh.gov.bn/Shared%20Documents/COVID-19%20Vaccine/FAQs%20General%20Covid%2019%20Vaccine_04032021.pdf">http://www.moh.gov.bn/Shared%20Documents/COVID-19%20Vaccine/FAQs%20General%20Covid%2019%20Vaccine_04032021.pdf</a><br><a href="https://www.thestar.com.my/aseanplus/aseanplus-news/2021/10/20/brunei-to-vaccinate-children-aged-12-17">https://www.thestar.com.my/aseanplus/aseanplus-news/2021/10/20/brunei-to-vaccinate-children-aged-12-17</a><br><a href="http://www.moh.gov.bn/Shared%20Documents/COVID-19%20Vaccine/Brunei%20Darussalam%20Vaccination%20Strategy%20V2.pdf">http://www.moh.gov.bn/Shared%20Documents/COVID-19%20Vaccine/Brunei%20Darussalam%20Vaccination%20Strategy%20V2.pdf</a> |
| Cambodia               | Free | 6+  | No data                                                                                                                                                                                                                                                                                                      | Cambodia to Administer Booster Shots to General Public from Mid-October – Cambodia News Service<br><a href="http://www.xinhuanet.com/english/asiapacific/2021-04/09/c_139869140.htm">http://www.xinhuanet.com/english/asiapacific/2021-04/09/c_139869140.htm</a>                                                                                                                                                                                                                                                                                                                                                                                                                                                                |
| China                  | Free | 12+ | Those who are allergic to the ingredients of the vaccine or who have history of allergy to the same type of vaccine; history of serious allergy to vaccines (such as acute allergic reactions, angioedema, breathing difficulty); people with uncontrolled epilepsy and other serious neurological diseases; | <a href="http://www.nhc.gov.cn/wjw/hygq/202104/8e62004e41d648d5a084b3fb7bf098ea.shtml">http://www.nhc.gov.cn/wjw/hygq/202104/8e62004e41d648d5a084b3fb7bf098ea.shtml</a><br><a href="http://english.nmpa.gov.cn/2021-04/01/c_608350.htm">http://english.nmpa.gov.cn/2021-04/01/c_608350.htm</a>                                                                                                                                                                                                                                                                                                                                                                                                                                  |

|              |      |     |                                                                                                                                                                    |                                                                                                                                                                                                                                                                                                                                                                                                                                                                                                  |
|--------------|------|-----|--------------------------------------------------------------------------------------------------------------------------------------------------------------------|--------------------------------------------------------------------------------------------------------------------------------------------------------------------------------------------------------------------------------------------------------------------------------------------------------------------------------------------------------------------------------------------------------------------------------------------------------------------------------------------------|
|              |      |     | patients with fever, or acute diseases, or during acute attacks of chronic diseases, or patients with uncontrolled severe chronic diseases; women during pregnancy |                                                                                                                                                                                                                                                                                                                                                                                                                                                                                                  |
| Cook Islands | Free | 12+ | No data                                                                                                                                                            | <a href="https://covid19.gov.ck/sites/default/files/2021-09/Approval%20given%20for%2012-15%20year%20old%20to%20be%20offered%20vaccine%202.pdf">https://covid19.gov.ck/sites/default/files/2021-09/Approval%20given%20for%2012-15%20year%20old%20to%20be%20offered%20vaccine%202.pdf</a>                                                                                                                                                                                                          |
| Fiji         | Free | 15+ | People with allergic reactions to the first dose                                                                                                                   | <a href="https://www.health.gov.fj/covid-19-vaccination-campaign/">https://www.health.gov.fj/covid-19-vaccination-campaign/</a><br><a href="https://www.health.gov.fj/children-15-17/">https://www.health.gov.fj/children-15-17/</a><br><a href="https://www.health.gov.fj/covid-vaccine/vaccine-faqs/">https://www.health.gov.fj/covid-vaccine/vaccine-faqs/</a>                                                                                                                                |
| Japan        | Free | 12+ | People with allergic reactions to vaccine component; people with a fever.                                                                                          | <a href="https://www.mhlw.go.jp/stf/covid-19/vaccine.html">https://www.mhlw.go.jp/stf/covid-19/vaccine.html</a><br><a href="https://www.cov19-vaccine.mhlw.go.jp/qa/receive/">https://www.cov19-vaccine.mhlw.go.jp/qa/receive/</a><br><a href="https://www.mhlw.go.jp/content/000759294.pdf">https://www.mhlw.go.jp/content/000759294.pdf</a>                                                                                                                                                    |
| Kiribati     | Free | 18+ | No data                                                                                                                                                            | <a href="https://www.mhms.gov.ki/single.php?id=26">https://www.mhms.gov.ki/single.php?id=26</a>                                                                                                                                                                                                                                                                                                                                                                                                  |
| Laos         | Free | 17+ | No data                                                                                                                                                            | <a href="http://www.xinhuanet.com/english/asiapacific/2021-08/10/c_1310118766.htm">http://www.xinhuanet.com/english/asiapacific/2021-08/10/c_1310118766.htm</a><br><a href="https://www.thestar.com.my/aseanplus/aseanplus-news/2021/09/18/laos-health-ministry-advises-covid-19-vaccine-jabs-for-pregnant-women-and-older-students">https://www.thestar.com.my/aseanplus/aseanplus-news/2021/09/18/laos-health-ministry-advises-covid-19-vaccine-jabs-for-pregnant-women-and-older-students</a> |
| Malaysia     | Free | 12+ | People with allergic reaction to vaccine component; people with immunodeficiency                                                                                   | <a href="https://www.npra.gov.my/easyarticles/images/users/1047/Frequently-Asked-Questions-FAQ-about-Comirnaty-Covid-19-Vaccine.pdf">https://www.npra.gov.my/easyarticles/images/users/1047/Frequently-Asked-Questions-FAQ-about-Comirnaty-Covid-19-Vaccine.pdf</a>                                                                                                                                                                                                                              |

|                  |         |     |                                                                                   |                                                                                                                                                                                                                                                                                                                                                                                                                                                                        |
|------------------|---------|-----|-----------------------------------------------------------------------------------|------------------------------------------------------------------------------------------------------------------------------------------------------------------------------------------------------------------------------------------------------------------------------------------------------------------------------------------------------------------------------------------------------------------------------------------------------------------------|
| Marshall Islands | No data | 18+ | No data                                                                           | <a href="https://www.rnz.co.nz/international/pacific-news/436910/marshall-leads-pacific-s-covid-19-vax-charge">https://www.rnz.co.nz/international/pacific-news/436910/marshall-leads-pacific-s-covid-19-vax-charge</a>                                                                                                                                                                                                                                                |
| Micronesia       | Free    | 12+ | No data                                                                           | <a href="https://hsa.gov.fm/fsm-covid-19-vaccination/">https://hsa.gov.fm/fsm-covid-19-vaccination/</a><br><a href="https://gov.fm/index.php/component/content/article/35-pio-articles/news-and-updates/430-covid-19-vaccines-now-available-for-all-eligible-citizens-18-in-all-fsm-states">https://gov.fm/index.php/component/content/article/35-pio-articles/news-and-updates/430-covid-19-vaccines-now-available-for-all-eligible-citizens-18-in-all-fsm-states</a> |
| Mongolia         | Free    | 12+ | No data                                                                           | <a href="https://moh.gov.mn/news/">https://moh.gov.mn/news/</a>                                                                                                                                                                                                                                                                                                                                                                                                        |
| Nauru            | No data | 18+ | No data                                                                           | <a href="http://naurugov.nr/media/146514/nauru_bulletin_03_9jul2021_228_.pdf">http://naurugov.nr/media/146514/nauru_bulletin_03_9jul2021_228_.pdf</a>                                                                                                                                                                                                                                                                                                                  |
| New Zealand      | Free    | 12+ | People with a history of anaphylaxis to any component or previous dose of mRNA-CV | <a href="https://www.health.govt.nz/our-work/immunisation-handbook-2020/5-coronavirus-disease-covid-19">https://www.health.govt.nz/our-work/immunisation-handbook-2020/5-coronavirus-disease-covid-19</a><br><a href="https://www.health.govt.nz/our-work/immunisation-handbook-2020/5-coronavirus-disease-covid-19">https://www.health.govt.nz/our-work/immunisation-handbook-2020/5-coronavirus-disease-covid-19</a>                                                 |
| Niue             | Free    | 12+ | No data                                                                           | <a href="https://covid19.govt.nz/iwi-and-communities/translations/niuean/">https://covid19.govt.nz/iwi-and-communities/translations/niuean/</a>                                                                                                                                                                                                                                                                                                                        |
| Palau            | No data | 12+ | No data                                                                           | <a href="https://covid19.govt.nz/iwi-and-communities/translations/niuean/the-covid-19-vaccine/vaccine-basics/">https://covid19.govt.nz/iwi-and-communities/translations/niuean/the-covid-19-vaccine/vaccine-basics/</a>                                                                                                                                                                                                                                                |
| Papua New Guinea | No data | 18+ | No data                                                                           | <a href="https://postcourier.com.pg/chinese-vaccine-to-be-gazetted/">https://postcourier.com.pg/chinese-vaccine-to-be-gazetted/</a>                                                                                                                                                                                                                                                                                                                                    |
| Philippines      | Free    | 12+ | People with allergic reactions to vaccine component or the first dose             | <a href="https://doh.gov.ph/vaccines">https://doh.gov.ph/vaccines</a><br><a href="https://doh.gov.ph/press-release/DOH-VACCINATION-AMONG-CHILDREN-AGED-12-17-TO-START-WITH-COMORBIDITIES-AS-PART-OF-A3-GROUP">https://doh.gov.ph/press-release/DOH-VACCINATION-AMONG-CHILDREN-AGED-12-17-TO-START-WITH-COMORBIDITIES-AS-PART-OF-A3-GROUP</a>                                                                                                                           |

|                 |         |     |                                                                                                                                                                             |                                                                                                                                                                                                                                                                                                                                                                                                                                                                                                |
|-----------------|---------|-----|-----------------------------------------------------------------------------------------------------------------------------------------------------------------------------|------------------------------------------------------------------------------------------------------------------------------------------------------------------------------------------------------------------------------------------------------------------------------------------------------------------------------------------------------------------------------------------------------------------------------------------------------------------------------------------------|
| Samoa           | Free    | 12+ | People with allergic reactions to vaccine component; people with a fever; people taking anticoagulant therapy; people with immunodeficiency; pregnant women; 85+ (optional) | <a href="https://vaccinocovid.iss.sm/faq">https://vaccinocovid.iss.sm/faq</a><br><a href="https://www.samoaoobserver.ws/category/samoa/90307">https://www.samoaoobserver.ws/category/samoa/90307</a>                                                                                                                                                                                                                                                                                           |
| Singapore       | Free    | 12+ | No data                                                                                                                                                                     | <a href="https://www.gov.sg/features/covid-19-vaccination">https://www.gov.sg/features/covid-19-vaccination</a>                                                                                                                                                                                                                                                                                                                                                                                |
| Solomon Islands | Free    | 18+ | No data                                                                                                                                                                     | <a href="https://solomons.gov.sb/roll-out-of-2nd-dose-of-astrazeneca-vaccine-now-underway-in-honiara/">https://solomons.gov.sb/roll-out-of-2nd-dose-of-astrazeneca-vaccine-now-underway-in-honiara/</a>                                                                                                                                                                                                                                                                                        |
| South Korea     | No data | 18+ | People with allergic reactions to the first dose or vaccine component; pregnant women; people with acute symptoms such as fever (37.5°C or higher)                          | <a href="http://english.seoul.go.kr/covid/covid-19-vaccination-guideline/">http://english.seoul.go.kr/covid/covid-19-vaccination-guideline/</a>                                                                                                                                                                                                                                                                                                                                                |
| Tonga           | Free    | 18+ | No data                                                                                                                                                                     | <a href="https://matangitonga.to/2021/08/24/tonga-fully-vaccinates-43-eligible-people-over-18?fbclid=IwAR3KFE6s_Brg8uj0JWH-YhmejAg1fdrlv-2nh95NOLu_uL510fdPSfOCeT4">https://matangitonga.to/2021/08/24/tonga-fully-vaccinates-43-eligible-people-over-18?fbclid=IwAR3KFE6s_Brg8uj0JWH-YhmejAg1fdrlv-2nh95NOLu_uL510fdPSfOCeT4</a>                                                                                                                                                              |
| Tuvalu          | No data | 18+ | No data                                                                                                                                                                     | <a href="https://www.facebook.com/AusHCfnfu/posts/750425468961962">https://www.facebook.com/AusHCfnfu/posts/750425468961962</a>                                                                                                                                                                                                                                                                                                                                                                |
| Vanuatu         | No data | 18+ | No data                                                                                                                                                                     | <a href="https://covid19.gov.vu/index.php/vaccination/information">https://covid19.gov.vu/index.php/vaccination/information</a>                                                                                                                                                                                                                                                                                                                                                                |
| Vietnam         | Free    | 12+ | No data                                                                                                                                                                     | <a href="https://en.vietnamplus.vn/ministry-grants-conditional-approval-of-pfizer-biontech-vaccine/202977.vnp">https://en.vietnamplus.vn/ministry-grants-conditional-approval-of-pfizer-biontech-vaccine/202977.vnp</a><br><a href="http://news.chinhphu.vn/Home/Viet-Nam-plans-to-vaccinate-adolescents-aged-1218-against-COVID19-this-month/202110/45761.vgp">http://news.chinhphu.vn/Home/Viet-Nam-plans-to-vaccinate-adolescents-aged-1218-against-COVID19-this-month/202110/45761.vgp</a> |

Abbreviation: 18+, people aged 18 years and above; HCW, healthcare workers

**Table S3. Recommendation on the use of an additional or booster dose of COVID-19 vaccine**

| Country         | Additional dose | Notes for additional dose                                                                          | Booster dose     | Notes for booster dose                                                                                             | Data source                                                                                                                                                                                                                                                                                                                                                                                                                                                                                                                                                                                                      |
|-----------------|-----------------|----------------------------------------------------------------------------------------------------|------------------|--------------------------------------------------------------------------------------------------------------------|------------------------------------------------------------------------------------------------------------------------------------------------------------------------------------------------------------------------------------------------------------------------------------------------------------------------------------------------------------------------------------------------------------------------------------------------------------------------------------------------------------------------------------------------------------------------------------------------------------------|
| <b>Africa</b>   |                 |                                                                                                    |                  |                                                                                                                    |                                                                                                                                                                                                                                                                                                                                                                                                                                                                                                                                                                                                                  |
| Andorra         | Yes             | <b>Indication:</b> People with immunodeficiency; people on dialysis; people receiving a transplant | Yes              | <b>Indication:</b> Vulnerable people like the elderly; residents in health centers                                 | <a href="https://www.govern.ad/comunicats/item/13197-s-inicia-l-administracio-de-la-tercera-dosi-voluntaria-als-residents-a-centres-sociosanitaris-de-gent-gran">https://www.govern.ad/comunicats/item/13197-s-inicia-l-administracio-de-la-tercera-dosi-voluntaria-als-residents-a-centres-sociosanitaris-de-gent-gran</a>                                                                                                                                                                                                                                                                                      |
| Mauritius       | No data         |                                                                                                    | Yes              | <b>Indication:</b> people receiving Sinopharm<br><b>Interval:</b> 120 d                                            | <a href="https://govmu.org/EN/newsgov/SitePages/2021/Vaccination-campaign-for-a-third-booster-Sinopharm-dose-to-kickstart-on-23-September-2021.aspx">https://govmu.org/EN/newsgov/SitePages/2021/Vaccination-campaign-for-a-third-booster-Sinopharm-dose-to-kickstart-on-23-September-2021.aspx</a>                                                                                                                                                                                                                                                                                                              |
| South Africa    | Yes             | <b>Indication:</b> people with immunosuppression                                                   | Under discussion |                                                                                                                    | <a href="https://www.sanews.gov.za/south-africa/covid-19-booster-shot-immunocompromised-south-africans">https://www.sanews.gov.za/south-africa/covid-19-booster-shot-immunocompromised-south-africans</a>                                                                                                                                                                                                                                                                                                                                                                                                        |
| Uganda          | No policy       |                                                                                                    | No policy        |                                                                                                                    |                                                                                                                                                                                                                                                                                                                                                                                                                                                                                                                                                                                                                  |
| <b>Americas</b> |                 |                                                                                                    |                  |                                                                                                                    |                                                                                                                                                                                                                                                                                                                                                                                                                                                                                                                                                                                                                  |
| Brazil          | Yes             | <b>Indication:</b> People with immunosuppression<br><b>Interval:</b> 28 d                          | Yes              | <b>Indication:</b> 60+; HCW<br><b>Interval:</b> 180 d                                                              | <a href="https://www.gov.br/saude/pt-br/coronavirus/vacinas/NTDoseReforo.pdf">https://www.gov.br/saude/pt-br/coronavirus/vacinas/NTDoseReforo.pdf</a><br><a href="https://www.reuters.com/world/americas/brazil-provide-covid-19-booster-shots-all-people-over-60-years-old-2021-09-28/">https://www.reuters.com/world/americas/brazil-provide-covid-19-booster-shots-all-people-over-60-years-old-2021-09-28/</a>                                                                                                                                                                                               |
| Canada          | Yes             | <b>Indication:</b> People with moderate to severe immunocompromision                               | Yes              | <b>Indication:</b> Long-term care residents; seniors living in other congregate settings<br><b>Interval:</b> 180 d | <a href="https://www.canada.ca/en/public-health/services/immunization/national-advisory-committee-on-immunization-naci/statement-september-10-2021-additional-dose-covid-19-vaccine-immunocompromised-following-1-2-dose-series.html">https://www.canada.ca/en/public-health/services/immunization/national-advisory-committee-on-immunization-naci/statement-september-10-2021-additional-dose-covid-19-vaccine-immunocompromised-following-1-2-dose-series.html</a><br><a href="https://www.canada.ca/en/public-health/services/immunization">https://www.canada.ca/en/public-health/services/immunization</a> |

|                    |         |                                                    |           |                                                                                                                                             |                                                                                                                                                                                                                                                       |
|--------------------|---------|----------------------------------------------------|-----------|---------------------------------------------------------------------------------------------------------------------------------------------|-------------------------------------------------------------------------------------------------------------------------------------------------------------------------------------------------------------------------------------------------------|
|                    |         |                                                    |           |                                                                                                                                             | <a href="#">/national-advisory-committee-on-immunization-naci/statement-september-28-2021-booster-dose-long-term-care-residents-seniors-living-other-congregate-settings.html?hq_e=el&amp;hq_m=2190695&amp;hq_l=1&amp;hq_v=e48b482e2d</a>             |
| Chile              | No data |                                                    | Yes       | <b>Indication:</b> People receiving Sinovac                                                                                                 | <a href="https://www.bloomberg.com/news/articles/2021-08-05/chile-rolls-out-covid-19-booster-campaign-that-mixes-vaccines">https://www.bloomberg.com/news/articles/2021-08-05/chile-rolls-out-covid-19-booster-campaign-that-mixes-vaccines</a>       |
| Colombia           | Yes     | <b>Indication:</b> People with immunosuppression   | Yes       | <b>Indication:</b> 65+; 18+ with underlying conditions; pregnant women; 18+ at high-risk exposure of SARS-CoV-2; 18+ living in nursing home | <a href="https://www.como.gov/covidvaccine/#elementor-toc__heading-anchor-5">https://www.como.gov/covidvaccine/#elementor-toc__heading-anchor-5</a>                                                                                                   |
| Dominican Republic | No data |                                                    | Yes       | <b>Indication:</b> 12+                                                                                                                      | <a href="https://twitter.com/RaquelPenaVice/status/1408186389204590596">https://twitter.com/RaquelPenaVice/status/1408186389204590596</a>                                                                                                             |
| Ecuador            | Yes     | <b>Indication:</b> people with weak immune systems | No data   |                                                                                                                                             | <a href="https://www.reuters.com/world/americas/ecuador-give-immune-weakened-people-third-covid-19-vaccine-2021-08-17/">https://www.reuters.com/world/americas/ecuador-give-immune-weakened-people-third-covid-19-vaccine-2021-08-17/</a>             |
| EI Salvador        | No data |                                                    | Yes       | <b>Indication:</b> 18+<br><b>Interval:</b> 120 d                                                                                            | <a href="https://www.presidencia.gob.sv/el-salvador-supero-el-de-aplicaciones-de-la-tercera-dosis-de-la-vacuna-anticovid-19/">https://www.presidencia.gob.sv/el-salvador-supero-el-de-aplicaciones-de-la-tercera-dosis-de-la-vacuna-anticovid-19/</a> |
| Mexico             | No data |                                                    | No policy |                                                                                                                                             |                                                                                                                                                                                                                                                       |
| Panama             | Yes     | <b>Indication:</b> people with immunosuppression   | Yes       | <b>Indication:</b> HCW; 55+; people in nursing home; security forces; 18-54 at high                                                         | <a href="https://www.reuters.com/world/americas/panama-give-immunocompromised-people-third-covid-19-vaccine-shot-2021-09-22/">https://www.reuters.com/world/americas/panama-give-immunocompromised-people-third-covid-19-vaccine-shot-2021-09-22/</a> |

|                              |         |                                                                           |                  |                                                                                                                                                                                                               |                                                                                                                                                                                                                                                                                                                                                                                                              |
|------------------------------|---------|---------------------------------------------------------------------------|------------------|---------------------------------------------------------------------------------------------------------------------------------------------------------------------------------------------------------------|--------------------------------------------------------------------------------------------------------------------------------------------------------------------------------------------------------------------------------------------------------------------------------------------------------------------------------------------------------------------------------------------------------------|
|                              |         |                                                                           |                  | risk of exposure; 18-54 with underlying conditions<br><b>Interval:</b> 180 d                                                                                                                                  | <a href="http://www.minsa.gob.pa/noticia/comunicado-ndeg-596">http://www.minsa.gob.pa/noticia/comunicado-ndeg-596</a>                                                                                                                                                                                                                                                                                        |
| Peru                         | No data |                                                                           | Yes              | <b>Indication:</b> HCW                                                                                                                                                                                        | <a href="https://www.youtube.com/watch?v=NiqPRcPo_1A">https://www.youtube.com/watch?v=NiqPRcPo_1A</a>                                                                                                                                                                                                                                                                                                        |
| United States                | Yes     | <b>Indication:</b> People with immunosuppression<br><b>Interval:</b> 28 d | Yes              | <b>Indication:</b> 65+; 18+ who live in long-term care settings; 18+ who have underlying medical conditions; 18+ who work in high-risk settings; 18+ who live in high-risk settings<br><b>Interval:</b> 180 d | <a href="https://www.cdc.gov/coronavirus/2019-ncov/vaccines/booster-shot.html">https://www.cdc.gov/coronavirus/2019-ncov/vaccines/booster-shot.html</a><br><a href="https://www.fda.gov/news-events/press-announcements/fda-issues-emergency-use-authorization-third-covid-19-vaccine">https://www.fda.gov/news-events/press-announcements/fda-issues-emergency-use-authorization-third-covid-19-vaccine</a> |
| Uruguay                      | Yes     | <b>Indication:</b> People with immunosuppression                          | Yes              | <b>Indication:</b> People receiving Sinovac; 18+<br><b>Interval:</b> 90 d                                                                                                                                     | <a href="https://www.gub.uy/ministerio-salud-publica/comunicacion/noticias/administracion-dosis-refuerzo-vacuna-contra-covid-19-immunodeprimidos">https://www.gub.uy/ministerio-salud-publica/comunicacion/noticias/administracion-dosis-refuerzo-vacuna-contra-covid-19-immunodeprimidos</a><br><a href="https://www.gub.uy/uruguaysevacuna">https://www.gub.uy/uruguaysevacuna</a>                         |
| <b>Eastern Mediterranean</b> |         |                                                                           |                  |                                                                                                                                                                                                               |                                                                                                                                                                                                                                                                                                                                                                                                              |
| Bahrain                      | No data |                                                                           | Yes              | <b>Indication:</b> 18+<br><b>Interval:</b> 180 d                                                                                                                                                              | <a href="https://healthalert.gov.bh/en/category/vaccine">https://healthalert.gov.bh/en/category/vaccine</a>                                                                                                                                                                                                                                                                                                  |
| Egypt                        | No data |                                                                           | Under discussion |                                                                                                                                                                                                               |                                                                                                                                                                                                                                                                                                                                                                                                              |
| Jordan                       | No data |                                                                           | Yes              | <b>Indication:</b> People receiving Sinopharm                                                                                                                                                                 | <a href="https://petra.gov.jo/Include/InnerPage.jsp?ID=36412&amp;lang=en&amp;name=en_news">https://petra.gov.jo/Include/InnerPage.jsp?ID=36412&amp;lang=en&amp;name=en_news</a>                                                                                                                                                                                                                              |



|                      |         |                                                                              |                  |                                                                                                                                               |                                                                                                                                                                                                                                                                                                                                                                                  |
|----------------------|---------|------------------------------------------------------------------------------|------------------|-----------------------------------------------------------------------------------------------------------------------------------------------|----------------------------------------------------------------------------------------------------------------------------------------------------------------------------------------------------------------------------------------------------------------------------------------------------------------------------------------------------------------------------------|
| Kuwait               | No data |                                                                              | Yes              | <b>Indication:</b> 18+                                                                                                                        | <a href="https://cov19vaccine.moh.gov.kw/SPCMS/CVD_19_Vaccine_Booster_Registration.aspx">https://cov19vaccine.moh.gov.kw/SPCMS/CVD_19_Vaccine_Booster_Registration.aspx</a>                                                                                                                                                                                                      |
| Lebanon              | Yes     | <b>Indication:</b> People with immunosuppression; people receiving Sinopharm | Yes              | <b>Indication:</b> 75+; frontline HCW                                                                                                         | <a href="https://www.moph.gov.lb/en/Pages/127/55387/recommendations-of-the-national-committee-for-covid-19-vaccine-on-the-administration-of-the-third-dose">https://www.moph.gov.lb/en/Pages/127/55387/recommendations-of-the-national-committee-for-covid-19-vaccine-on-the-administration-of-the-third-dose</a>                                                                |
| Oman                 | No data |                                                                              | Under discussion |                                                                                                                                               |                                                                                                                                                                                                                                                                                                                                                                                  |
| Pakistan             | Yes     | <b>Indication:</b> 12+ international travelers                               | No data          |                                                                                                                                               | <a href="https://ncoc.gov.pk/covid-vaccination-en.php">https://ncoc.gov.pk/covid-vaccination-en.php</a>                                                                                                                                                                                                                                                                          |
| Qatar                | No data |                                                                              | Yes              | <b>Indication:</b> 50+; people with chronic conditions which increase their risk for severe COVID-19 infection; people with immunosuppression | <a href="https://covid19.moph.gov.qa/EN/Covid19-Vaccine/Pages/FAQ.aspx">https://covid19.moph.gov.qa/EN/Covid19-Vaccine/Pages/FAQ.aspx</a><br><a href="https://www.gub.uy/ministerio-salud-publica/comunicacion/noticias/se-abre-agenda-terceras-dosis-18-59-anos">https://www.gub.uy/ministerio-salud-publica/comunicacion/noticias/se-abre-agenda-terceras-dosis-18-59-anos</a> |
| Saudi Arabia         | No data |                                                                              |                  | <b>Indication:</b> 60+<br><b>Interval:</b> 240 d                                                                                              | <a href="https://english.alarabiya.net/coronavirus/2021/09/27/Saudi-Arabia-will-provide-third-booster-COVID-19-vaccine-dose-for-over-60-years-old">https://english.alarabiya.net/coronavirus/2021/09/27/Saudi-Arabia-will-provide-third-booster-COVID-19-vaccine-dose-for-over-60-years-old</a>                                                                                  |
| Tunisia              | No data |                                                                              | Yes              | <b>Indication:</b> 50+ with underlying conditions                                                                                             |                                                                                                                                                                                                                                                                                                                                                                                  |
| United Arab Emirates | No data |                                                                              | Yes              | <b>Indication:</b> 60+; people with underlying condition; 18+ who receiving long-term                                                         | <a href="https://www.wam.ae/en/details/1395302977389">https://www.wam.ae/en/details/1395302977389</a>                                                                                                                                                                                                                                                                            |

|               |         |                                                                                                                                                                                                                                                                                                   |     |                                                                                                                                                        |                                                                                                                                                                                                                                                                                                                |
|---------------|---------|---------------------------------------------------------------------------------------------------------------------------------------------------------------------------------------------------------------------------------------------------------------------------------------------------|-----|--------------------------------------------------------------------------------------------------------------------------------------------------------|----------------------------------------------------------------------------------------------------------------------------------------------------------------------------------------------------------------------------------------------------------------------------------------------------------------|
|               |         |                                                                                                                                                                                                                                                                                                   |     | health care<br><b>Interval:</b> 180 d                                                                                                                  |                                                                                                                                                                                                                                                                                                                |
| <b>Europe</b> |         |                                                                                                                                                                                                                                                                                                   |     |                                                                                                                                                        |                                                                                                                                                                                                                                                                                                                |
| Albania       | Yes     | <b>Indication:</b> 12+ with immunosuppression                                                                                                                                                                                                                                                     | Yes | <b>Indication:</b> 60+; people with underlying conditions; frontline workers                                                                           | <a href="https://albaniandailynews.com/news/albania-to-start-covid-19-booster-shots-for-60-plus-citizens">https://albaniandailynews.com/news/albania-to-start-covid-19-booster-shots-for-60-plus-citizens</a>                                                                                                  |
| Austria       | Yes     | <b>Indication:</b> Personnel in old people's, nursing and retirement homes; health care personnel; personnel in mobile care, support, nursing and 24-hour care as well as caring relatives; staff in educational institutions (childcare, school, university, etc.)<br><b>Interval:</b> 270-365 d | Yes | <b>Indication:</b> 16+; 12+ at risk<br><b>Interval:</b> 270-365 d; 180-270 d                                                                           | <a href="https://www.thelocal.at/20210827/first-austrian-state-to-start-covid-booster-shots-from-monday/">https://www.thelocal.at/20210827/first-austrian-state-to-start-covid-booster-shots-from-monday/</a>                                                                                                  |
| Azerbaijan    | No data |                                                                                                                                                                                                                                                                                                   | Yes | <b>Indication:</b> HCW; 60+                                                                                                                            | <a href="https://www.azernews.az/nation/184187.html">https://www.azernews.az/nation/184187.html</a>                                                                                                                                                                                                            |
| Belgium       | Yes     | <b>Indication:</b> People with diminished immunity, caused by a particular disease or by treatment                                                                                                                                                                                                | Yes | <b>Indication:</b> Residents of nursing homes; 65+; patients in assisted living apartments; people in day care centers, psychogeriatric facilities and | <a href="https://www.health.belgium.be/fr/news/conference-interministrielle-sante-publique-0">https://www.health.belgium.be/fr/news/conference-interministrielle-sante-publique-0</a><br><a href="https://www.info-coronavirus.be/en/vaccination/#faq">https://www.info-coronavirus.be/en/vaccination/#faq</a> |

|          |         |                                                                                             |     |                                                                                                                                            |                                                                                                                                                                                                                                                                                                                                                                                                                                                                                                                                                                                                                                                                                               |
|----------|---------|---------------------------------------------------------------------------------------------|-----|--------------------------------------------------------------------------------------------------------------------------------------------|-----------------------------------------------------------------------------------------------------------------------------------------------------------------------------------------------------------------------------------------------------------------------------------------------------------------------------------------------------------------------------------------------------------------------------------------------------------------------------------------------------------------------------------------------------------------------------------------------------------------------------------------------------------------------------------------------|
|          |         |                                                                                             |     | psychiatric care homes                                                                                                                     |                                                                                                                                                                                                                                                                                                                                                                                                                                                                                                                                                                                                                                                                                               |
| Bulgaria | Yes     | <b>Indication:</b> people with immunosuppression<br><b>Interval:</b> 28 d                   | Yes | <b>Indication:</b> Persons in old people's homes and social institutions for residential accommodation; HCW; 65+<br><b>Interval:</b> 180 d | <a href="https://coronavirus.bg/bg/news/251">https://coronavirus.bg/bg/news/251</a>                                                                                                                                                                                                                                                                                                                                                                                                                                                                                                                                                                                                           |
| Cyprus   | No data |                                                                                             | Yes | <b>Indication:</b> 60+; People with underlying condition<br><b>Interval:</b> 180 d                                                         | <a href="https://www.pio.gov.cy/coronavirus/uploads/18102021--%CE%A7%CE%BF%CF%81%CE%AE%CE%B3%CE%B7%CF%83%CE%B7%203%CE%B7%CF%82%20%CE%B4%CF%8C%CF%83%CE%B7%CF%82%20%CE%B5%CE%BC%CE%B2%CE%BF%CE%BB%CE%AF%CE%BF%CF%85%20%CF%83%CE%B5%20%CE%AC%CF%84%CE%BF%CE%BC%CE%B1%2060%20%CE%B5%CF%84%CF%8E%CE%BD%20%CE%BA%CE%B1%CE%B9%20%CE%AC%CE%BD%CF%89.pdf">https://www.pio.gov.cy/coronavirus/uploads/18102021--%CE%A7%CE%BF%CF%81%CE%AE%CE%B3%CE%B7%CF%83%CE%B7%203%CE%B7%CF%82%20%CE%B4%CF%8C%CF%83%CE%B7%CF%82%20%CE%B5%CE%BC%CE%B2%CE%BF%CE%BB%CE%AF%CE%BF%CF%85%20%CF%83%CE%B5%20%CE%AC%CF%84%CE%BF%CE%BC%CE%B1%2060%20%CE%B5%CF%84%CF%8E%CE%BD%20%CE%BA%CE%B1%CE%B9%20%CE%AC%CE%BD%CF%89.pdf</a> |
| Czechia  | Yes     | <b>Indication:</b> People with moderate to severe immune suppression                        | Yes | <b>Indication:</b> 12+<br><b>Interval:</b> 180 d                                                                                           | <a href="http://www.news.cn/english/2021-08/31/c_1310158121.htm">http://www.news.cn/english/2021-08/31/c_1310158121.htm</a><br><a href="https://covid.gov.cz/en/situations/register-vaccination/booster-and-additional-dose">https://covid.gov.cz/en/situations/register-vaccination/booster-and-additional-dose</a>                                                                                                                                                                                                                                                                                                                                                                          |
| Denmark  | Yes     | <b>Indication:</b> People with severely impaired immune system<br><b>Interval:</b> 30-270 d | Yes | <b>Indication:</b> 65+; essential workers<br><b>Interval:</b> 180 d                                                                        | <a href="https://www.sst.dk/da/Nyheder/2021/Personer-med-et-svaert-nedsat-immunforsvar-bliver-nu-tilbudt-en-3_-dosis-COVID-19-vaccine">https://www.sst.dk/da/Nyheder/2021/Personer-med-et-svaert-nedsat-immunforsvar-bliver-nu-tilbudt-en-3_-dosis-COVID-19-vaccine</a><br><a href="https://www.sst.dk/da/corona/Vaccination/Revaccination-af-ud">https://www.sst.dk/da/corona/Vaccination/Revaccination-af-ud</a>                                                                                                                                                                                                                                                                            |

|         |         |                                                                                                                               |         |                                                                                                                                                                                                                                                                         |                                                                                                                                                                                                                                                                                                                                                                                                                            |
|---------|---------|-------------------------------------------------------------------------------------------------------------------------------|---------|-------------------------------------------------------------------------------------------------------------------------------------------------------------------------------------------------------------------------------------------------------------------------|----------------------------------------------------------------------------------------------------------------------------------------------------------------------------------------------------------------------------------------------------------------------------------------------------------------------------------------------------------------------------------------------------------------------------|
|         |         |                                                                                                                               |         |                                                                                                                                                                                                                                                                         | valgte-grupper                                                                                                                                                                                                                                                                                                                                                                                                             |
| Estonia | Yes     | <b>Indication:</b> People with a weakened immune system                                                                       | Yes     | <b>Indication:</b> 65+; 18+ requiring for a booster dose<br><b>Interval:</b> 180 d; 240 d                                                                                                                                                                               | <a href="https://vaktsineeri.ee/en/news/third-vaccine-doses-may-be-available-in-october/">https://vaktsineeri.ee/en/news/third-vaccine-doses-may-be-available-in-october/</a><br><a href="https://vaktsineeri.ee/en/news/booster-doses-will-become-available-for-key-workers/(65+,care-home inhabitant)">https://vaktsineeri.ee/en/news/booster-doses-will-become-available-for-key-workers/(65+,care-home inhabitant)</a> |
| Finland | Yes     | <b>Indication:</b> People with severe immunosuppression; people receiving the first and second dose less than six weeks apart | Yes     | <b>Indication:</b> HCW; elderly residents of nursing home and the employees caring for them<br><b>Interval:</b> 21-28 d                                                                                                                                                 | <a href="https://thl.fi/en/web/thlfi-en/-/thl-proposes-a-third-coronavirus-vaccine-dose-for-limited-groups">https://thl.fi/en/web/thlfi-en/-/thl-proposes-a-third-coronavirus-vaccine-dose-for-limited-groups</a>                                                                                                                                                                                                          |
| France  | No data |                                                                                                                               | Yes     | <b>Indication:</b> 65+; certain particularly fragile patients; people who have been vaccinated with the Janssen vaccine; Health and medico-social professionals; medical transport professionals; those 18 and over who are immunocompromised<br><b>Interval:</b> 180 d | <a href="https://vaccination-info-service.fr/Les-maladies-et-leurs-vaccins/COVID-19">https://vaccination-info-service.fr/Les-maladies-et-leurs-vaccins/COVID-19</a>                                                                                                                                                                                                                                                        |
| Germany | Yes     | <b>Indication:</b> People who may                                                                                             | No data | <b>Indication:</b> 70+; old people in                                                                                                                                                                                                                                   | <a href="https://www.bundesgesundheitsministerium.de/coronavirus/fa">https://www.bundesgesundheitsministerium.de/coronavirus/fa</a>                                                                                                                                                                                                                                                                                        |

|         |         |                                                                                                                                                                                                                                                                                                 |     |                                                                                                                                                                                                                      |                                                                                                                                                                                                                                                                                                                                   |
|---------|---------|-------------------------------------------------------------------------------------------------------------------------------------------------------------------------------------------------------------------------------------------------------------------------------------------------|-----|----------------------------------------------------------------------------------------------------------------------------------------------------------------------------------------------------------------------|-----------------------------------------------------------------------------------------------------------------------------------------------------------------------------------------------------------------------------------------------------------------------------------------------------------------------------------|
|         |         | not have a sufficient or rapidly decreasing immune response after a complete vaccination, including residents of care facilities, facilities for people with disabilities, other facilities with vulnerable groups, people with immunodeficiency or immunosuppression<br><b>Interval:</b> 180 d |     | nursing home; HCW<br><b>Interval:</b> 180 d                                                                                                                                                                          | q-covid-19-impfung.html#c21988<br><a href="https://www.rki.de/DE/Content/Kommissionen/STIKO/Empfehlungen/PM_2021-10-07.html;jsessionid=A597C1109F012BB859E304E5DFDAF898.internet101">https://www.rki.de/DE/Content/Kommissionen/STIKO/Empfehlungen/PM_2021-10-07.html;jsessionid=A597C1109F012BB859E304E5DFDAF898.internet101</a> |
| Greece  | No data |                                                                                                                                                                                                                                                                                                 | Yes | <b>Indication:</b> 60+; HCW                                                                                                                                                                                          | <a href="https://www.euractiv.com/section/politics/short_news/greece-offers-booster-dose-as-thousands-of-health-workers-suspended/">https://www.euractiv.com/section/politics/short_news/greece-offers-booster-dose-as-thousands-of-health-workers-suspended/</a>                                                                 |
| Hungary | No data |                                                                                                                                                                                                                                                                                                 | Yes | <b>Indication:</b> 18+<br><b>Interval:</b> 120 d                                                                                                                                                                     | <a href="https://koronavirus.gov.hu/cikkek/magyarorszag-az-also-ahol-mar-harmadik-oltasra-lehet-idopontot-foglalni">https://koronavirus.gov.hu/cikkek/magyarorszag-az-also-ahol-mar-harmadik-oltasra-lehet-idopontot-foglalni</a>                                                                                                 |
| Iceland | No data |                                                                                                                                                                                                                                                                                                 | Yes | <b>Indication:</b> 12+ with a history of COVID-19; individuals without history of COVID-19 antibodies who were vaccinated with the Janssen vaccine; nursing home residents and other very vulnerable welfare service | <a href="https://www.landlaeknir.is/um-embattid/greinar/grein/item47460/booster-vaccinations-for-covid-19-">https://www.landlaeknir.is/um-embattid/greinar/grein/item47460/booster-vaccinations-for-covid-19-</a>                                                                                                                 |

|         |         |                                                                                                                                                                                                                                                                                             |     |                                                                                                                                                       |                                                                                                                                                                                                                                                                                                                                                                                                                                                                      |
|---------|---------|---------------------------------------------------------------------------------------------------------------------------------------------------------------------------------------------------------------------------------------------------------------------------------------------|-----|-------------------------------------------------------------------------------------------------------------------------------------------------------|----------------------------------------------------------------------------------------------------------------------------------------------------------------------------------------------------------------------------------------------------------------------------------------------------------------------------------------------------------------------------------------------------------------------------------------------------------------------|
|         |         |                                                                                                                                                                                                                                                                                             |     | recipients (60 years and older only); highly immunosuppressed individuals with continuing immunosuppression; 60+ outside nursing homes; frontline HCW |                                                                                                                                                                                                                                                                                                                                                                                                                                                                      |
| Ireland | Yes     | <b>Indication:</b> People with cancer, kidney diseases, HIV, transplants, genetic diseases, High dose systemic steroids, immunocompromise; people with following treatment in the last 6 months: Cyclophosphamide, Rituximab, Alemtuzumab, Cladribine, Ocrelizumab<br><b>Interval:</b> 60 d | Yes | <b>Indication:</b> 65+ living in Long Term Residential Care Facilities; 80+ living in the community                                                   | <a href="https://www2.hse.ie/screening-and-vaccinations/covid-19-vaccine/get-the-vaccine/weak-immune-system/">https://www2.hse.ie/screening-and-vaccinations/covid-19-vaccine/get-the-vaccine/weak-immune-system/</a><br><a href="https://www2.hse.ie/screening-and-vaccinations/covid-19-vaccine/get-the-vaccine/covid-19-vaccine-booster-dose/">https://www2.hse.ie/screening-and-vaccinations/covid-19-vaccine/get-the-vaccine/covid-19-vaccine-booster-dose/</a> |
| Israel  | No data |                                                                                                                                                                                                                                                                                             | Yes | <b>Indication:</b> 12+<br><b>Interval:</b> 150 d                                                                                                      | <a href="https://govextra.gov.il/ministry-of-health/covid19-vaccine/en-covid19-vaccination-information/">https://govextra.gov.il/ministry-of-health/covid19-vaccine/en-covid19-vaccination-information/</a><br><a href="https://govextra.gov.il/ministry-of-health/covid19-vaccine/en-covid19-vaccine-faqs/">https://govextra.gov.il/ministry-of-health/covid19-vaccine/en-covid19-vaccine-faqs/</a>                                                                 |
| Italy   | Yes     | <b>Indication:</b> people who                                                                                                                                                                                                                                                               | Yes | <b>Indication:</b> 60+; vulnerable                                                                                                                    | <a href="https://www.aifa.gov.it/en/domande-e-risposte-su-vaccini-covi">https://www.aifa.gov.it/en/domande-e-risposte-su-vaccini-covi</a>                                                                                                                                                                                                                                                                                                                            |

|            |           |                                                                                                                                                                                                                                    |           |                                                                                          |                                                                                                                                                                                                                                                                                                                                                                                                                                                                                                                                                                                                                                                                                            |
|------------|-----------|------------------------------------------------------------------------------------------------------------------------------------------------------------------------------------------------------------------------------------|-----------|------------------------------------------------------------------------------------------|--------------------------------------------------------------------------------------------------------------------------------------------------------------------------------------------------------------------------------------------------------------------------------------------------------------------------------------------------------------------------------------------------------------------------------------------------------------------------------------------------------------------------------------------------------------------------------------------------------------------------------------------------------------------------------------------|
|            |           | received a solid organ transplant or who are immunocompromised<br><b>Interval:</b> 28 d                                                                                                                                            |           | people                                                                                   | d-19<br><a href="https://www.salute.gov.it/portale/nuovocoronavirus/dettaglioComunicatiNuovoCoronavirus.jsp?lingua=italiano&amp;id=5835">https://www.salute.gov.it/portale/nuovocoronavirus/dettaglioComunicatiNuovoCoronavirus.jsp?lingua=italiano&amp;id=5835</a>                                                                                                                                                                                                                                                                                                                                                                                                                        |
| Kazakhstan | No data   |                                                                                                                                                                                                                                    | Yes       | <b>Indication:</b> 12+<br><b>Interval:</b> 180-270 d                                     | <a href="https://primeminister.kz/en/news/reviews/deni-sau-ult-kazakstannyn-densaulyk-saktau-ministriginin-ulityk-zhobasy-kanday-bagyttardy-iske-asyrudy-kamtidy-1895549">https://primeminister.kz/en/news/reviews/deni-sau-ult-kazakstannyn-densaulyk-saktau-ministriginin-ulityk-zhobasy-kanday-bagyttardy-iske-asyrudy-kamtidy-1895549</a>                                                                                                                                                                                                                                                                                                                                              |
| Kyrgyzstan | No policy |                                                                                                                                                                                                                                    | No policy |                                                                                          |                                                                                                                                                                                                                                                                                                                                                                                                                                                                                                                                                                                                                                                                                            |
| Latvia     | Yes       | <b>Indication:</b> People with high immunosuppression<br><b>Interval:</b> 28 d                                                                                                                                                     | No data   | <b>Indication:</b> 65+; 18+ in nursing home; HCW<br><b>Interval:</b> 180 d               | <a href="https://www.vm.gov.lv/lv/jaunums/ari-latvija-saks-treso-vakcinu-devu-pret-covid-19-administresanu-ka-pirmie-tas-sanems-cilveki-ar-butiski-novajinatu-imuno-sistemu">https://www.vm.gov.lv/lv/jaunums/ari-latvija-saks-treso-vakcinu-devu-pret-covid-19-administresanu-ka-pirmie-tas-sanems-cilveki-ar-butiski-novajinatu-imuno-sistemu</a><br><a href="https://www.vm.gov.lv/lv/jaunums/uzsak-papilddevas-3-devas-vakcinaciju-pret-covid-19-senioriem-65-veselibas-aprupes-sistemas-darbiniekiem-un-sac-klientiem">https://www.vm.gov.lv/lv/jaunums/uzsak-papilddevas-3-devas-vakcinaciju-pret-covid-19-senioriem-65-veselibas-aprupes-sistemas-darbiniekiem-un-sac-klientiem</a> |
| Lithuania  | Yes       | <b>Indication:</b> High-risk patients with onco-hematological diseases, receiving treatment for onco-hematological diseases, on dialysis or after organ transplantation, with autoimmune diseases when receiving immunosuppressive | Yes       | <b>Indication:</b> HCW; people with underlying conditions; 65+<br><b>Interval:</b> 180 d | <a href="https://sam.lrv.lt/lt/naujienos/nustatyta-tvarka-kaip-trecia-doze-bus-revakcinuojami-imunosupresiniai-pacientai">https://sam.lrv.lt/lt/naujienos/nustatyta-tvarka-kaip-trecia-doze-bus-revakcinuojami-imunosupresiniai-pacientai</a><br><a href="https://koronastop.lrv.lt/lt/duk/vakcinacija-nuo-covid-19/revakcinacija#item-1054">https://koronastop.lrv.lt/lt/duk/vakcinacija-nuo-covid-19/revakcinacija#item-1054</a>                                                                                                                                                                                                                                                         |

|                 |         |                                                                                             |                  |                                                                                                    |                                                                                                                                                                                                                                                                                                                                                                                                                                                                                                                                                                                                                                                                                                                                                                                        |
|-----------------|---------|---------------------------------------------------------------------------------------------|------------------|----------------------------------------------------------------------------------------------------|----------------------------------------------------------------------------------------------------------------------------------------------------------------------------------------------------------------------------------------------------------------------------------------------------------------------------------------------------------------------------------------------------------------------------------------------------------------------------------------------------------------------------------------------------------------------------------------------------------------------------------------------------------------------------------------------------------------------------------------------------------------------------------------|
|                 |         | therapy                                                                                     |                  |                                                                                                    |                                                                                                                                                                                                                                                                                                                                                                                                                                                                                                                                                                                                                                                                                                                                                                                        |
| Luxembourg      | Yes     | <b>Indication:</b><br>Immunocompromised patients                                            | Yes              | <b>Indication:</b> 75+; older adults in nursing home; people on dialysis<br><b>Interval:</b> 180 d | <a href="https://sante.public.lu/fr/espace-professionnel/recommandations/conseil-maladies-infectieuses/covid-19/covid-19-annexes/CS-MI-recommandation-3eme-dose-vaccin-COVID-19-personnes-immunodeprimees.pdf">https://sante.public.lu/fr/espace-professionnel/recommandations/conseil-maladies-infectieuses/covid-19/covid-19-annexes/CS-MI-recommandation-3eme-dose-vaccin-COVID-19-personnes-immunodeprimees.pdf</a><br><a href="https://msan.gouvernement.lu/en/actualites.gouvernement%2B/en%2Bactualites%2Btoutes_actualites%2Bcommuniques%2B2021%2B09-septembre%2B14-vaccin-dose-additionnelle.html">https://msan.gouvernement.lu/en/actualites.gouvernement%2B/en%2Bactualites%2Btoutes_actualites%2Bcommuniques%2B2021%2B09-septembre%2B14-vaccin-dose-additionnelle.html</a> |
| Malta           | Yes     | <b>Indication:</b> Old frail people; people with immunosuppression<br><b>Interval:</b> 21 d | No data          |                                                                                                    | <a href="https://deputyprimeminister.gov.mt/en/health-promotion/covid-19/Pages/vaccines.aspx">https://deputyprimeminister.gov.mt/en/health-promotion/covid-19/Pages/vaccines.aspx</a><br><a href="https://www.independent.com.mt/articles/2021-09-13/local-news/Malta-starts-giving-Covid-19-booster-shots-to-immunosuppressed-patients-6736236685">https://www.independent.com.mt/articles/2021-09-13/local-news/Malta-starts-giving-Covid-19-booster-shots-to-immunosuppressed-patients-6736236685</a>                                                                                                                                                                                                                                                                               |
| Montenegro      | Yes     | <b>Indication:</b> Vulnerable people<br><b>Interval:</b> 60 d                               | No data          |                                                                                                    | <a href="https://www.covidodgovor.me/me/cesta-pitanja">https://www.covidodgovor.me/me/cesta-pitanja</a>                                                                                                                                                                                                                                                                                                                                                                                                                                                                                                                                                                                                                                                                                |
| Netherlands     | Yes     | <b>Indication:</b> People with immunosuppression                                            | Under discussion |                                                                                                    | <a href="https://www.rivm.nl/en/covid-19-vaccination/vaccines/immunocompromised-patients#rm-why-are-some-people-with-severely-impaired-immunity-receiving-a-third-vaccination-620821-more">https://www.rivm.nl/en/covid-19-vaccination/vaccines/immunocompromised-patients#rm-why-are-some-people-with-severely-impaired-immunity-receiving-a-third-vaccination-620821-more</a>                                                                                                                                                                                                                                                                                                                                                                                                        |
| North Macedonia | No data |                                                                                             | Yes              | Indication: 60+; HCW; people with immunosuppression<br>Interval: 180d                              | <a href="https://koronavirus.gov.mk/vesti/223104">https://koronavirus.gov.mk/vesti/223104</a>                                                                                                                                                                                                                                                                                                                                                                                                                                                                                                                                                                                                                                                                                          |



|          |         |                                                                                 |         |                                                                          |                                                                                                                                                                                                                                                                                                                                                                                                                                        |
|----------|---------|---------------------------------------------------------------------------------|---------|--------------------------------------------------------------------------|----------------------------------------------------------------------------------------------------------------------------------------------------------------------------------------------------------------------------------------------------------------------------------------------------------------------------------------------------------------------------------------------------------------------------------------|
| Norway   | Yes     | <b>Indication:</b> People with immunosuppression                                | Yes     | <b>Indication:</b> 65+<br><b>Interval:</b> 180 d                         | <a href="https://www.fhi.no/publ/brev/ytterligere-informasjon-om-en-trjedje-dose-til-de-med-alvorlig-nedsatt-immun/">https://www.fhi.no/publ/brev/ytterligere-informasjon-om-en-trjedje-dose-til-de-med-alvorlig-nedsatt-immun/</a><br><a href="https://www.fhi.no/en/news/2021/booster-dose-for-the-elderly-and-nursing-home-residents/">https://www.fhi.no/en/news/2021/booster-dose-for-the-elderly-and-nursing-home-residents/</a> |
| Poland   | Yes     | <b>Indication:</b> 12+ with immunosuppression<br><b>Interval:</b> At least 28 d | Yes     | <b>Indication:</b> 50+; HCW<br><b>Interval:</b> 180 d                    | <a href="https://www.gov.pl/web/zdrowie/komunikat-nr-12-ministra-zdrowia-w-sprawie-szczepien-przeciw-covid-19-dawka-przypominajaca-oraz-dawka-dodatkowa-uzupelnijaca-schemat-podstawowy">https://www.gov.pl/web/zdrowie/komunikat-nr-12-ministra-zdrowia-w-sprawie-szczepien-przeciw-covid-19-dawka-przypominajaca-oraz-dawka-dodatkowa-uzupelnijaca-schemat-podstawowy</a>                                                            |
| Portugal | Yes     | <b>Indication:</b> People with immunosuppression                                | Yes     | <b>Indication:</b> 65+; people in nursing home<br><b>Interval:</b> 180 d | <a href="https://covid19.min-saude.pt/terceira-dose-comeca-a-ser-administrada-a-idosos-com-mais-de-65-anos-e-residentes-em-lares/">https://covid19.min-saude.pt/terceira-dose-comeca-a-ser-administrada-a-idosos-com-mais-de-65-anos-e-residentes-em-lares/</a>                                                                                                                                                                        |
| Romania  | No data |                                                                                 | Yes     | <b>Indication:</b> 12+<br><b>Interval:</b> 180 d                         | <a href="https://balkaninsight.com/2021/09/23/romania-to-offer-vaccine-booster-doses-as-covid-19-surges/">https://balkaninsight.com/2021/09/23/romania-to-offer-vaccine-booster-doses-as-covid-19-surges/</a>                                                                                                                                                                                                                          |
| Russia   | No data |                                                                                 | Yes     | <b>Indication:</b> 18+<br><b>Interval:</b> 180 d                         |                                                                                                                                                                                                                                                                                                                                                                                                                                        |
| Serbia   | No data |                                                                                 | Yes     | <b>Indication:</b> 18+<br><b>Interval:</b> 180 d                         | <a href="https://www.srbija.gov.rs/vest/en/177106/third-dose-of-covid-19-vaccine-available-as-of-tomorrow.php">https://www.srbija.gov.rs/vest/en/177106/third-dose-of-covid-19-vaccine-available-as-of-tomorrow.php</a>                                                                                                                                                                                                                |
| Slovakia | No data |                                                                                 | Yes     | <b>Indication:</b> 12+<br><b>Interval:</b> 240 d                         | <a href="https://worldakkam.com/covid-booster-shots-will-be-available-in-slovakia-starting-monday/310423/">https://worldakkam.com/covid-booster-shots-will-be-available-in-slovakia-starting-monday/310423/</a>                                                                                                                                                                                                                        |
| Slovenia | Yes     | <b>Indication:</b> 70+ and particularly vulnerable chronic patients             | No data |                                                                          | <a href="https://www.cepimose.si/cepljenje-proti-covidu-19/pogosta-vprasanja-in-odgovori/">https://www.cepimose.si/cepljenje-proti-covidu-19/pogosta-vprasanja-in-odgovori/</a>                                                                                                                                                                                                                                                        |

|                        |         |                                                                                                   |                  |                                                                                                        |                                                                                                                                                                                                                                                                                                                                                                                                                                                                                                                                                                  |
|------------------------|---------|---------------------------------------------------------------------------------------------------|------------------|--------------------------------------------------------------------------------------------------------|------------------------------------------------------------------------------------------------------------------------------------------------------------------------------------------------------------------------------------------------------------------------------------------------------------------------------------------------------------------------------------------------------------------------------------------------------------------------------------------------------------------------------------------------------------------|
| Spain                  | Yes     | <b>Indication:</b> People with immunosuppression; 40+ with Down Syndrome<br><b>Interval:</b> 28 d | Yes              | <b>Indication:</b> 70+; inmates in nursing homes<br><b>Interval:</b> 180 d                             | <a href="https://www.vacunacovid.gob.es/preguntas-y-respuestas/quien-es-recibiran-una-dosis-adicional-de-la-vacuna">https://www.vacunacovid.gob.es/preguntas-y-respuestas/quien-es-recibiran-una-dosis-adicional-de-la-vacuna</a><br><a href="https://www.vacunacovid.gob.es/preguntas-y-respuestas">https://www.vacunacovid.gob.es/preguntas-y-respuestas</a>                                                                                                                                                                                                   |
| Sweden                 | Yes     | <b>Indication:</b> 18+ with severe immunosuppression<br><b>Interval:</b> 56 d                     | Yes              | <b>Indication:</b> People in nursing home or receiving home care; 80+<br><b>Interval:</b> 180 d        | <a href="https://www.folkhalsomyndigheten.se/smittskydd-beredskap/utbrott/aktuella-utbrott/covid-19/vaccination-mot-covid-19/fragor-och-svar-om-vaccination-mot-covid-19/">https://www.folkhalsomyndigheten.se/smittskydd-beredskap/utbrott/aktuella-utbrott/covid-19/vaccination-mot-covid-19/fragor-och-svar-om-vaccination-mot-covid-19/</a><br><a href="https://www.1177.se/en/other-languages/other-languages/covid-19/vaccin-engelska/#section-133829">https://www.1177.se/en/other-languages/other-languages/covid-19/vaccin-engelska/#section-133829</a> |
| Switzerland            | Yes     | <b>Indication:</b> people with severe immunosuppression                                           | Under discussion |                                                                                                        | <a href="https://www.ge.ch/en/getting-vaccinated-against-covid-19/faq-vaccination-against-covid-19">https://www.ge.ch/en/getting-vaccinated-against-covid-19/faq-vaccination-against-covid-19</a>                                                                                                                                                                                                                                                                                                                                                                |
| Turkey                 | Yes     |                                                                                                   | No data          | <b>Indication:</b> HCW at high risk; 50+<br><b>Interval:</b> 90 d                                      | <a href="https://covid19asi.saglik.gov.tr/EN-78316/frequently-asked-questions.html?Sayfa=1">https://covid19asi.saglik.gov.tr/EN-78316/frequently-asked-questions.html?Sayfa=1</a>                                                                                                                                                                                                                                                                                                                                                                                |
| United Kingdom         | Yes     | <b>Indication:</b> People with immunosuppression<br><b>Interval:</b> 60 d                         | Yes              | <b>Indication:</b> 50+; HCW; 16-49 at risk of severe illness; pregnant women<br><b>Interval:</b> 180 d | <a href="https://www.gov.uk/government/news/jcvi-issues-updated-advice-on-covid-19-booster-vaccination">https://www.gov.uk/government/news/jcvi-issues-updated-advice-on-covid-19-booster-vaccination</a><br><a href="https://www.nhs.uk/conditions/coronavirus-covid-19/coronavirus-vaccination/coronavirus-booster-vaccine/">https://www.nhs.uk/conditions/coronavirus-covid-19/coronavirus-vaccination/coronavirus-booster-vaccine/</a>                                                                                                                       |
| <b>South-East Asia</b> |         |                                                                                                   |                  |                                                                                                        |                                                                                                                                                                                                                                                                                                                                                                                                                                                                                                                                                                  |
| India                  | No data |                                                                                                   | Under discussion |                                                                                                        |                                                                                                                                                                                                                                                                                                                                                                                                                                                                                                                                                                  |
| Indonesia              | No data |                                                                                                   | Yes              | <b>Indication:</b> HCW                                                                                 | <a href="https://www.kemkes.go.id/article/view/21080200001/kemenke">https://www.kemkes.go.id/article/view/21080200001/kemenke</a>                                                                                                                                                                                                                                                                                                                                                                                                                                |

|                        |         |                                                                                  |                  |                                                                                  |                                                                                                                                                                                                                                                                                                                                                                                                     |
|------------------------|---------|----------------------------------------------------------------------------------|------------------|----------------------------------------------------------------------------------|-----------------------------------------------------------------------------------------------------------------------------------------------------------------------------------------------------------------------------------------------------------------------------------------------------------------------------------------------------------------------------------------------------|
|                        |         |                                                                                  |                  |                                                                                  | s-tegaskan-vaksinasi-booster-hanya-untuk-tenaga-kesehatan.html                                                                                                                                                                                                                                                                                                                                      |
| Nepal                  | No data |                                                                                  | No policy        |                                                                                  |                                                                                                                                                                                                                                                                                                                                                                                                     |
| New Zealand            | Yes     | <b>Indication:</b> people with severe immunosuppression<br><b>Interval:</b> 56 d | Under discussion |                                                                                  | <a href="https://www.health.govt.nz/our-work/diseases-and-conditions/covid-19-novel-coronavirus/covid-19-vaccines/covid-19-vaccine-health-advice/covid-19-vaccine-severely-immunocompromised-people">https://www.health.govt.nz/our-work/diseases-and-conditions/covid-19-novel-coronavirus/covid-19-vaccines/covid-19-vaccine-health-advice/covid-19-vaccine-severely-immunocompromised-people</a> |
| Sri Lanka              | No data |                                                                                  | Yes              | <b>Indication:</b> Frontline workers; tourism staff                              | <a href="https://www.reuters.com/world/asia-pacific/sri-lanka-orders-covid-19-booster-shots-frontline-workers-tourism-industry-2021-10-22/">https://www.reuters.com/world/asia-pacific/sri-lanka-orders-covid-19-booster-shots-frontline-workers-tourism-industry-2021-10-22/</a>                                                                                                                   |
| Thailand               | No data |                                                                                  | Yes              | <b>Indication:</b> 12+                                                           |                                                                                                                                                                                                                                                                                                                                                                                                     |
| Bhutan                 | No data |                                                                                  | Under discussion |                                                                                  |                                                                                                                                                                                                                                                                                                                                                                                                     |
| <b>Western Pacific</b> |         |                                                                                  |                  |                                                                                  |                                                                                                                                                                                                                                                                                                                                                                                                     |
| Australia              | Yes     | <b>Indication:</b> 12+ with immunosuppression<br><b>Interval:</b> 60-180 d       | No policy        |                                                                                  | <a href="https://www.health.gov.au/ministers/the-hon-greg-hunt-mp/media/booster-shot-for-severely-immunocompromised-australians">https://www.health.gov.au/ministers/the-hon-greg-hunt-mp/media/booster-shot-for-severely-immunocompromised-australians</a>                                                                                                                                         |
| Cambodia               | No data |                                                                                  | Yes              | <b>Indication:</b> 18+<br><b>Interval:</b> 120 d                                 | <a href="https://cambodianewsservice.com/cambodia-to-administer-booster-shots-to-general-public-from-mid-october/">https://cambodianewsservice.com/cambodia-to-administer-booster-shots-to-general-public-from-mid-october/</a>                                                                                                                                                                     |
| China                  | No data |                                                                                  | Yes              | <b>Indication:</b> People at high risk of exposure; 60+; international travelers | <a href="http://kw.beijing.gov.cn/art/2021/9/26/art_6722_613586.html">http://kw.beijing.gov.cn/art/2021/9/26/art_6722_613586.html</a>                                                                                                                                                                                                                                                               |

|              |           |                                                                            |                  |                                                                                                 |                                                                                                                                                                                                                                                                                                                                                                                                                                                                                      |
|--------------|-----------|----------------------------------------------------------------------------|------------------|-------------------------------------------------------------------------------------------------|--------------------------------------------------------------------------------------------------------------------------------------------------------------------------------------------------------------------------------------------------------------------------------------------------------------------------------------------------------------------------------------------------------------------------------------------------------------------------------------|
| Cook Islands | No policy |                                                                            | No policy        |                                                                                                 |                                                                                                                                                                                                                                                                                                                                                                                                                                                                                      |
| Japan        | Yes       | <b>Interval:</b> 240 d                                                     | Under discussion |                                                                                                 | <a href="https://www.mhlw.go.jp/content/10601000/000833964.pdf">https://www.mhlw.go.jp/content/10601000/000833964.pdf</a>                                                                                                                                                                                                                                                                                                                                                            |
| Laos         | No policy |                                                                            | No policy        |                                                                                                 |                                                                                                                                                                                                                                                                                                                                                                                                                                                                                      |
| Malaysia     | No data   |                                                                            | No data          | <b>Indication:</b> 18+<br><b>Interval:</b> 180 d                                                | <a href="https://covid-19.moh.gov.my/semasa-kkm/2021/10/kelulusan-bersyarat-pemberian-dos-penggalak-booster-dose">https://covid-19.moh.gov.my/semasa-kkm/2021/10/kelulusan-bersyarat-pemberian-dos-penggalak-booster-dose</a>                                                                                                                                                                                                                                                        |
| Micronesia   | No data   |                                                                            | Yes              | <b>Indication:</b> 65+; 18+ with underlying conditions; 18+ at high risk of SARS-CoV-2 exposure | <a href="https://ghs.guam.gov/jic-release-no-811-four-covid-19-related-fatalities-reported-covid-19-updates-60-hospitalized-165">https://ghs.guam.gov/jic-release-no-811-four-covid-19-related-fatalities-reported-covid-19-updates-60-hospitalized-165</a>                                                                                                                                                                                                                          |
| Mongolia     | No data   |                                                                            | Yes              |                                                                                                 | <a href="https://akipress.com/news:663617:Mongolia_vaccinates_359,447_people_with_3rd_dose_of_coronavirus_vaccine/">https://akipress.com/news:663617:Mongolia_vaccinates_359,447_people_with_3rd_dose_of_coronavirus_vaccine/</a>                                                                                                                                                                                                                                                    |
| Palau        | Yes       | <b>Indication:</b> people with immunosuppression                           | No data          |                                                                                                 | <a href="http://www.palauhealth.org/2019nCoV/PR-old/MHHS%20PSA%20VACCINATION%203RD%20DOSE%2009092021.pdf">http://www.palauhealth.org/2019nCoV/PR-old/MHHS%20PSA%20VACCINATION%203RD%20DOSE%2009092021.pdf</a>                                                                                                                                                                                                                                                                        |
| Philippines  | No data   |                                                                            | Under discussion |                                                                                                 |                                                                                                                                                                                                                                                                                                                                                                                                                                                                                      |
| Singapore    | Yes       | <b>Indication:</b> People with immunosuppression; people receiving Sinovac | Yes              | <b>Indication:</b> HCW; 18+ in institutionalised settings; 30+<br><b>Interval:</b> 180d         | <a href="https://www.moh.gov.sg/news-highlights/details/updates-to-healthcare-protocols-and-implementation-of-vaccine-booster-strategy_10Sep2021">https://www.moh.gov.sg/news-highlights/details/updates-to-healthcare-protocols-and-implementation-of-vaccine-booster-strategy_10Sep2021</a><br><a href="https://www.gov.sg/article/expanding-vaccine-booster-programme-to-more-individuals">https://www.gov.sg/article/expanding-vaccine-booster-programme-to-more-individuals</a> |

|             |           |  |           |                        |                                                                                                                                                                                                                                           |
|-------------|-----------|--|-----------|------------------------|-------------------------------------------------------------------------------------------------------------------------------------------------------------------------------------------------------------------------------------------|
| South Korea | No data   |  | Yes       | <b>Indication:</b> 75+ | <a href="https://www.reuters.com/world/asia-pacific/skorea-vaccinate-12-17-year-olds-give-boosters-elderly-2021-09-27/">https://www.reuters.com/world/asia-pacific/skorea-vaccinate-12-17-year-olds-give-boosters-elderly-2021-09-27/</a> |
| Tuvalu      | No policy |  | No policy |                        |                                                                                                                                                                                                                                           |
| Vanuatu     | No policy |  | No policy |                        |                                                                                                                                                                                                                                           |

Abbreviation: d, days.

**Table S4. Country lists of selling/donating or receiving COVID-19 vaccines**

| Country role                  | Country lists                                                                                                                                                                                                                                                                                                                                                                                                                                                                                                                                                                                                                                                                                                                                                                                                                                                                                                                                                                                                                                                                                                                                                                                                                                                                                                                                                                                                                                                                                                                                                                                                                                                                                                                            |
|-------------------------------|------------------------------------------------------------------------------------------------------------------------------------------------------------------------------------------------------------------------------------------------------------------------------------------------------------------------------------------------------------------------------------------------------------------------------------------------------------------------------------------------------------------------------------------------------------------------------------------------------------------------------------------------------------------------------------------------------------------------------------------------------------------------------------------------------------------------------------------------------------------------------------------------------------------------------------------------------------------------------------------------------------------------------------------------------------------------------------------------------------------------------------------------------------------------------------------------------------------------------------------------------------------------------------------------------------------------------------------------------------------------------------------------------------------------------------------------------------------------------------------------------------------------------------------------------------------------------------------------------------------------------------------------------------------------------------------------------------------------------------------|
| Selling or donating countries | Australia; Bahrain; Bhutan; Canada; China; Colombia; Iceland; Japan; Korea; Kuwait; Mauritius; Mexico; Monaco; New Zealand; Norway; Oman; The Philippines; Qatar; Saudi Arabia; Singapore; Switzerland; Austria; Belgium; Croatia; Denmark; Estonia; Finland; France; Germany; Greece; Ireland; Italy; Luxembourg; Malta; Netherlands; Poland; Portugal; Spain; Sweden; United Kingdom; United States; Vietnam; United Arab Emirates.                                                                                                                                                                                                                                                                                                                                                                                                                                                                                                                                                                                                                                                                                                                                                                                                                                                                                                                                                                                                                                                                                                                                                                                                                                                                                                    |
| Recipient countries           | Afghanistan; Albania; Algeria; Andorra; Angola; Antigua and Barbuda; Argentina; Armenia; Australia; Azerbaijan; Bahamas; Bahrain; Bangladesh; Barbados; Belize; Benin; Bhutan; Bolivia; Bosnia and Herzegovina; Botswana; Brazil; Brunei Darussalam; Burkina Faso; Cabo Verde; Cambodia; Cameroon; Canada; Central African Republic; Chad; Chile; China; Colombia; Comoros; Congo, Dem. Rep.; Congo, Rep.; Costa Rica; Cote d'Ivoire; Djibouti; Dominica; Dominican Republic; Ecuador; Egypt, Arab Rep.; El Salvador; Eswatini; Ethiopia; Fiji; Gabon; Gambia, The; Georgia; Ghana; Grenada; Guatemala; Guinea; Guinea-Bissau; Guyana; Haiti; Honduras; India <sup>4</sup> ; Indonesia; Iran; Iraq; Israel; Jamaica; Jordan; Kenya; Kiribati; Korea, Dem. People's Rep.; Kosovo; Kuwait; Kyrgyz Republic; Lao PDR; Lebanon; Lesotho; Liberia; Libya; Madagascar; Malawi; Malaysia; Maldives; Mali; Mauritania; Mauritius; Mexico; Micronesia; Moldova; Monaco; Mongolia; Montenegro; Morocco; Mozambique; Myanmar; Namibia; Nauru; Nepal; New Zealand; Nicaragua; Niger; Nigeria; North Korea; North Macedonia; Oman; Pakistan; Panama; Papua New Guinea; Paraguay; Peru; Philippines; Qatar; Rwanda; Samoa; Sao Tome and Principe; Saudi Arabia; Senegal; Serbia; Sierra Leone; Singapore; Solomon Islands; Somalia; South Africa; South Sudan; South Korea; Sri Lanka; St. Kitts and Nevis; St. Lucia; St. Vincent and the Grenadines; Sudan; Suriname; Syria; Tajikistan; Timor-Leste; Togo; Tonga; Trinidad and Tobago; Tunisia; Tuvalu; Uganda; Ukraine; United Arab Emirates; United Kingdom; and Northern Ireland; Tanzania; Uruguay; Uzbekistan; Vanuatu; Venezuela; Vietnam; West Bank and Gaza; Yemen, Rep.; Zambia; Zimbabwe. |

The data are derived from COVAX<sup>2</sup>.

## **Target population for primary vaccination**

### *Method to estimate the size of target population*

#### **Metrics**

Some metrics have been collected to estimate target population: 1) **Total population estimates**. The age-specific population estimates by country in 2020 were mainly derived from the UN World Population Prospects, supplemented by the WorldPop datasets for some countries with age-specific proportion unavailable. 2) **The indication groups for primary vaccination**. The population groups who are eligible for a COVID-19 vaccine, recommended by governments/health departments. Indication groups varied by countries, which might be general population with a certain age group or some specific population groups, e.g., frontline workers. 3) **The contraindication groups**. The population who should not get vaccinated against COVID-19 recommended by governments/health departments, e.g., pregnant women, people with certain underlying conditions (i.e., bleeding disorders and immune suppression), and those previously infected with SARS-CoV-2. They should be excluded from the indication groups according to the vaccination policy in each country.

#### **Definition of special population groups**

Two underlying conditions are considered in this study: bleeding disorders and immune suppression. A bleeding disorder is defined as condition in which the blood's ability to clot is impaired or at thrombotic states<sup>3</sup>. Diseases that would cause bleeding disorder are considered as a bleeding problem. In the case of immune suppression, we include categories of cancers with direct immune suppression and cancers with possible immune suppression (from treatment therapy), as well as HIV/AIDS without receiving antiretroviral therapy (ART) based on Clark's method<sup>4</sup>. The categories and definitions of special population groups are presented in Supplementary Table 5, in which specific causes of bleeding disorders and immune suppression defined by GBD study group were listed.

**Table S5. Categories and definitions of special population groups belonging to indication and contraindication lists**

| <b>Population groups</b>                                                  | <b>Definition</b>                                 | <b>Size data available</b> | <b>Data source</b>             |
|---------------------------------------------------------------------------|---------------------------------------------------|----------------------------|--------------------------------|
| <b>Pregnancy-related people</b>                                           |                                                   |                            |                                |
| Pregnant women                                                            | -                                                 | Yes                        | Wang W et al, BMJ <sup>5</sup> |
| Breastfeeding (lactation) women                                           | -                                                 | No                         | -                              |
| Plan to get pregnancy                                                     | -                                                 | No                         | -                              |
| <b>People working at potentially greater risk of SARS-CoV-2 infection</b> |                                                   |                            |                                |
| Healthcare workers                                                        | Including healthcare workers, nurses and midwives | Yes                        | Wang W et al, BMJ <sup>5</sup> |
| People maintaining society safety and national security                   | Police and military                               | Yes                        | Wang W et al, BMJ <sup>5</sup> |



|                         |                                                                                                                                                                                                                               |     |                                |
|-------------------------|-------------------------------------------------------------------------------------------------------------------------------------------------------------------------------------------------------------------------------|-----|--------------------------------|
| Other essential workers | People engaging in electricity, gas, water, food, steam, air conditioning, and accommodation supply; participating in sewerage, waste management, and remediation activities; involved in domestic transportation and storage | Yes | Wang W et al, BMJ <sup>5</sup> |
|-------------------------|-------------------------------------------------------------------------------------------------------------------------------------------------------------------------------------------------------------------------------|-----|--------------------------------|

| People at higher risk of severe COVID-19 disease                                                                                                                                                           |                                                                                                                     |           |                                                                                                                                                                                                                                                                                                                                                                                                       |
|------------------------------------------------------------------------------------------------------------------------------------------------------------------------------------------------------------|---------------------------------------------------------------------------------------------------------------------|-----------|-------------------------------------------------------------------------------------------------------------------------------------------------------------------------------------------------------------------------------------------------------------------------------------------------------------------------------------------------------------------------------------------------------|
| Residents living in nursing homes/long-care homes/centers/facilities/institutions/settings or receiving home care                                                                                          | Elderly people receiving long-term care at a residential care facility and at home                                  | Partially | <a href="https://www.who.int/data/maternal-newborn-child-adolescent-ageing/indicator-explorer-new/mca/percentage-of-older-people-receiving-long-term-care-at-a-residential-care-facility-and-at-home">https://www.who.int/data/maternal-newborn-child-adolescent-ageing/indicator-explorer-new/mca/percentage-of-older-people-receiving-long-term-care-at-a-residential-care-facility-and-at-home</a> |
| Vulnerable people with high risk of experiencing irreversible and devastating harm from COVID-19 due to their health conditions, which included the elderly and people with underlying medical conditions. | Underlying conditions included cardiovascular disease, chronic kidney disease, chronic respiratory disease, chronic | Yes       | Clark A et al. Lancet GH <sup>4</sup><br>Wang W et al, BMJ <sup>5</sup>                                                                                                                                                                                                                                                                                                                               |

|  |                                                                                                                                                                                                                                                                                  |  |  |
|--|----------------------------------------------------------------------------------------------------------------------------------------------------------------------------------------------------------------------------------------------------------------------------------|--|--|
|  | liver<br>disease,<br>diabetes,<br>cancer with<br>direct<br>immunosup<br>pression,<br>cancer<br>without<br>direct<br>immunosup<br>pression but<br>with<br>possible<br>immunosup<br>pression<br>caused by<br>treatment,<br>HIV or<br>AIDS,<br>tuberculosis<br>(excluding<br>latent |  |  |
|--|----------------------------------------------------------------------------------------------------------------------------------------------------------------------------------------------------------------------------------------------------------------------------------|--|--|

|                                                                                                                                                                                                                                                                                                                               |  |  |
|-------------------------------------------------------------------------------------------------------------------------------------------------------------------------------------------------------------------------------------------------------------------------------------------------------------------------------|--|--|
| <p>infections),<br/>chronic<br/>neurological<br/>disorders,<br/>and sickle<br/>cell<br/>disorders.<br/>And target<br/>population<br/>in this<br/>category<br/>was<br/>classified<br/>into (1)<br/>people<br/>younger<br/>than 60<br/>years with<br/>at least one<br/>underlying<br/>condition;<br/>(2) people<br/>aged 60</p> |  |  |
|-------------------------------------------------------------------------------------------------------------------------------------------------------------------------------------------------------------------------------------------------------------------------------------------------------------------------------|--|--|

|                                                    |                                                                                                                              |     |                                                |
|----------------------------------------------------|------------------------------------------------------------------------------------------------------------------------------|-----|------------------------------------------------|
|                                                    | years or older with at least one underlying conditions; (3) people aged 80 years or older without any underlying conditions. |     |                                                |
| People with (moderate to severe) immunosuppression | <b>Cancers with direct immune suppression:</b> Hodgkin lymphoma; Non-Hodgkin lymphoma; Multiple myeloma;                     | Yes | Estimated used data from GBD 2019 <sup>6</sup> |

|  |                                                                                                                                                                                                                                                                                |  |  |
|--|--------------------------------------------------------------------------------------------------------------------------------------------------------------------------------------------------------------------------------------------------------------------------------|--|--|
|  | Acute<br>lymphoid<br>leukemia;<br>Chronic<br>lymphoid<br>leukemia;<br>Acute<br>myeloid<br>leukemia;<br>Chronic<br>myeloid<br>leukemia;<br>Other<br>leukemia;<br>Other<br>malignant<br>neoplasms;<br>Myelodyspl<br>astic,<br>myeloprolif<br>erative, and<br>other<br>hematopoie |  |  |
|--|--------------------------------------------------------------------------------------------------------------------------------------------------------------------------------------------------------------------------------------------------------------------------------|--|--|

tic  
neoplasms  
**Cancers  
with  
possible  
immune  
suppression (from  
treatment  
therapy):**  
Lip and oral  
cavity  
cancer;  
Nasopharyn  
x cancer;  
Other  
pharynx  
cancer;  
Esophageal  
cancer;  
Stomach  
cancer;  
Colon and

|  |                                                                                                                                                                                                                                                                                                           |  |  |
|--|-----------------------------------------------------------------------------------------------------------------------------------------------------------------------------------------------------------------------------------------------------------------------------------------------------------|--|--|
|  | rectum<br>cancer;<br>Liver<br>cancer due<br>to hepatitis<br>B; Liver<br>cancer due<br>to hepatitis<br>B; Liver<br>cancer due<br>to hepatitis<br>B; Liver<br>cancer due<br>to hepatitis<br>C; Liver<br>cancer due<br>to alcohol<br>use; Liver<br>cancer due<br>to NASH;<br>Liver<br>cancer due<br>to other |  |  |
|--|-----------------------------------------------------------------------------------------------------------------------------------------------------------------------------------------------------------------------------------------------------------------------------------------------------------|--|--|



|  |                                                                                                                                                                                                                                                                                 |  |
|--|---------------------------------------------------------------------------------------------------------------------------------------------------------------------------------------------------------------------------------------------------------------------------------|--|
|  | causes;<br>Gallbladder<br>and biliary<br>tract cancer;<br>Pancreatic<br>cancer;<br>Larynx<br>cancer;<br>Tracheal,<br>bronchus,<br>and lung<br>cancer;<br>Malignant<br>skin<br>melanoma;<br>Breast<br>cancer;<br>Cervical<br>cancer;<br>Uterine<br>cancer;<br>Ovarian<br>cancer; |  |
|--|---------------------------------------------------------------------------------------------------------------------------------------------------------------------------------------------------------------------------------------------------------------------------------|--|

|                                |                                                                                                                                                                                               |     |                                                |
|--------------------------------|-----------------------------------------------------------------------------------------------------------------------------------------------------------------------------------------------|-----|------------------------------------------------|
|                                | Prostate cancer;<br>Testicular cancer;<br>Kidney cancer;<br>Bladder cancer;<br>Brain and nervous system cancer;<br>Thyroid cancer;<br>Mesothelioma<br><b>HIV/AIDS without receiving ART**</b> |     |                                                |
| People with bleeding disorders | Other nutritional deficiencies                                                                                                                                                                | Yes | Estimated used data from GBD 2019 <sup>6</sup> |

|  |                                                                                                                                                                                                                                                                |  |  |
|--|----------------------------------------------------------------------------------------------------------------------------------------------------------------------------------------------------------------------------------------------------------------|--|--|
|  | <p>; Acute hepatitis A;<br/>Acute hepatitis B;<br/>Acute hepatitis C;<br/>Acute hepatitis E;<br/>Liver cancer due to hepatitis B; Liver cancer due to hepatitis C; Liver cancer due to alcohol use; Liver cancer due to other causes;<br/>Liver cancer due</p> |  |  |
|--|----------------------------------------------------------------------------------------------------------------------------------------------------------------------------------------------------------------------------------------------------------------|--|--|

|  |                                                                                                                                                                                                                                                                                   |  |  |
|--|-----------------------------------------------------------------------------------------------------------------------------------------------------------------------------------------------------------------------------------------------------------------------------------|--|--|
|  | to NASH;<br>Cirrhosis<br>and other<br>chronic<br>liver<br>diseases<br>due to<br>hepatitis B;<br>Cirrhosis<br>and other<br>chronic<br>liver<br>diseases<br>due to<br>hepatitis C;<br>Cirrhosis<br>and other<br>chronic<br>liver<br>diseases<br>due to<br>alcohol use;<br>Cirrhosis |  |  |
|--|-----------------------------------------------------------------------------------------------------------------------------------------------------------------------------------------------------------------------------------------------------------------------------------|--|--|

|  |                                                                                                                                                                                                                                      |  |  |
|--|--------------------------------------------------------------------------------------------------------------------------------------------------------------------------------------------------------------------------------------|--|--|
|  | <p>and other chronic liver diseases due to other causes;<br/>Cirrhosis and other chronic liver diseases due to NAFLD;<br/>Endocrine, metabolic, blood, and immune disorders;<br/>Dengue;<br/>Yellow fever;<br/>Multiple myeloma;</p> |  |  |
|--|--------------------------------------------------------------------------------------------------------------------------------------------------------------------------------------------------------------------------------------|--|--|

|  |                                                                                                                                                                                                                                                                             |  |  |
|--|-----------------------------------------------------------------------------------------------------------------------------------------------------------------------------------------------------------------------------------------------------------------------------|--|--|
|  | Acute<br>lymphoid<br>leukemia;<br>Chronic<br>lymphoid<br>leukemia;<br>Acute<br>myeloid<br>leukemia;<br>Chronic<br>myeloid<br>leukemia;<br>Other<br>leukemia;<br>Myelodyspl<br>astic,<br>myeloprolif<br>erative, and<br>other<br>hematopoie<br>tic<br>neoplasms;<br>Venomous |  |  |
|--|-----------------------------------------------------------------------------------------------------------------------------------------------------------------------------------------------------------------------------------------------------------------------------|--|--|

|                                                                        |                           |                                                    |   |
|------------------------------------------------------------------------|---------------------------|----------------------------------------------------|---|
|                                                                        | animal contact            |                                                    |   |
| People on dialysis                                                     | -                         | No                                                 | - |
| <b>Others</b>                                                          |                           |                                                    |   |
| International travelers                                                | -                         | No                                                 | - |
| People previously infected with SARS-CoV-2                             | COVID-19 cumulative cases | Yes                                                |   |
| People receiving vaccines from Janssen & Janssen, Sinovac or Sinopharm | -                         | Partially, and was available in Chile and Uruguay* |   |

\* For those data that are not available, we excluded them in the calculation.

\*\* ART coverage among people living with HIV is derived from WHO<sup>7</sup> and published literature<sup>8,9</sup>. We assumed that countries with such value unavailable are replaced with regional data. For example, we replaced ART coverage in Sweden with average value in Europe Region (71.0%).

### **Estimate peoples of population size with bleeding disorders and immune suppression**

Since the prevalence of the sub-categories of each disease (bleeding disorders or immune suppression) was separately reported by GBD, one person can simultaneously suffer more than one sub-category of such disease, namely multimorbidity. Thus, we estimated the number of people who suffered at least one bleeding disorders- or immune suppression-related conditions, rather than directly adding the number of sub-categories of bleeding disorders or immune suppression.

We mainly adopted the Clark's method<sup>4</sup> to estimate the size of individuals with bleeding disorders or immune suppression. Here, we briefly explain this process. First, data on the prevalence ( $p$ ) of sub-categories of bleeding disorders or immune suppression were extracted by age and country from GBD 2019<sup>6</sup>. Then, the expected proportion of individuals with at least one bleeding problems or at least one immune suppression problems were estimated, which we refer to  $e$  here.  $e_{\text{bleeding}}$  for bleeding problems was acquired by 1 minus the probability of not having a condition in any of the 26 bleeding problems  $c_{\text{bleeding}i}$ :  $1 - [1 - p(c_{\text{bleeding}1})] \times [1 - p(c_{\text{bleeding}2})] \times \dots \times [1 - p(c_{\text{bleeding}27})]$ ; and  $e_{\text{immuno}}$  for immunosuppression was acquired by 1 minus the probability of not having a condition in any of the 40 immunosuppression problems  $c_{\text{immuno}i}$ :  $1 - [1 - p(c_{\text{immuno}1})] \times [1 - p(c_{\text{immuno}2})] \times \dots \times [1 - p(c_{\text{immuno}40})]$ . Subsequently, the observed proportion ( $P$ ) of people with at least one underlying condition was calculated by  $P = e \times r$ , where  $r$  was the ratio between the observed and expected percentage of individuals with at least one condition, with details in Clark et al<sup>4</sup>.

14 types of sub-diseases are considered as both bleeding disorders and immune suppression, including multiple myeloma, acute lymphoid leukemia, chronic lymphoid leukemia, acute myeloid leukemia, chronic myeloid leukemia, other leukemia, myelodysplastic, myeloproliferative, other hematopoietic neoplasms, liver cancer due to hepatitis B, liver cancer due to hepatitis C, liver cancer due to alcohol use, liver cancer due to other causes, and liver cancer due to nonalcoholic steatohepatitis (NASH). When calculating the proportion of individuals with at least one underlying conditions for these sub-diseases, we counted them once:  $(1 - [1 - p(c_{\text{bleeding}1})] \times [1 - p(c_{\text{bleeding}2})] \times \dots \times [1 - p(c_{\text{bleeding}26})] \times [1 - p(c_{\text{immuno}1})] \times [1 - p(c_{\text{immuno}2})] \times \dots \times [1 - p(c_{\text{immuno}26})]) \times r$ .

### **Estimate population size of target population**

We calculated the country-specific number of contraindication groups by adding the size of pregnant women, people with certain underlying conditions, and those previously infected with SARS-CoV-2 according to the national immunization policy. Then, we estimated the size of target population for primary immunization by subtracting the population of contraindications group from the population of indication groups.



**Table S6. Global, regional, and national target population.**

| <b>Locations</b>       | <b>No. of total population (million)</b> | <b>No. of unapproved age groups (million)</b> | <b>No. of contraindication population (million)</b> | <b>Target population (million)</b> |
|------------------------|------------------------------------------|-----------------------------------------------|-----------------------------------------------------|------------------------------------|
| <b>Global</b>          |                                          |                                               |                                                     |                                    |
| Total                  | 7750.0                                   | 2074.5                                        | 132.1                                               | 5525.6                             |
| <b>WHO regions</b>     |                                          |                                               |                                                     |                                    |
| AFR                    | 1120.2                                   | 587.7                                         | 9.4                                                 | 531.1                              |
| AMR                    | 1018.1                                   | 186.9                                         | 40.2                                                | 791.1                              |
| EMR                    | 725.7                                    | 240.9                                         | 8.7                                                 | 476.1                              |
| EUR                    | 932.9                                    | 149.2                                         | 23.2                                                | 760.4                              |
| SEAR                   | 2021.4                                   | 618.2                                         | 29.9                                                | 1347.5                             |
| WPR                    | 1931.7                                   | 291.6                                         | 20.7                                                | 1619.5                             |
| <b>Country</b>         |                                          |                                               |                                                     |                                    |
| Afghanistan            | 38.9                                     | 19.1                                          | -                                                   | 19.8                               |
| Albania                | 2.9                                      | 0.6                                           | -                                                   | 2.3                                |
| Algeria                | 43.9                                     | 15.3                                          | -                                                   | 28.6                               |
| Andorra                | 0.1                                      | 0.0                                           | -                                                   | 0.1                                |
| Angola                 | 32.9                                     | 17.5                                          | -                                                   | 15.4                               |
| Antigua and Barbuda    | 0.1                                      | 0.0                                           | 0.0                                                 | 0.1                                |
| Argentina              | 45.2                                     | 8.9                                           | 0.8                                                 | 35.5                               |
| Armenia                | 3.0                                      | 0.7                                           | 0.0                                                 | 2.2                                |
| Australia              | 25.5                                     | 4.0                                           | 0.3                                                 | 21.2                               |
| Austria                | 9.0                                      | 1.0                                           | 0.1                                                 | 7.9                                |
| Azerbaijan             | 10.1                                     | 2.0                                           | 0.2                                                 | 8.0                                |
| Bahamas                | 0.4                                      | 0.1                                           | -                                                   | 0.3                                |
| Bahrain                | 1.7                                      | 0.3                                           | 0.0                                                 | 1.4                                |
| Bangladesh             | 164.7                                    | 53.4                                          | -                                                   | 111.3                              |
| Barbados               | 0.3                                      | 0.0                                           | -                                                   | 0.2                                |
| Belarus                | 9.4                                      | 1.7                                           | 0.3                                                 | 7.4                                |
| Belgium                | 11.6                                     | 1.6                                           | 0.1                                                 | 9.9                                |
| Belize                 | 0.4                                      | 0.1                                           | -                                                   | 0.3                                |
| Benin                  | 12.1                                     | 5.9                                           | -                                                   | 6.2                                |
| Bhutan                 | 0.8                                      | 0.2                                           | 0.0                                                 | 0.6                                |
| Bolivia                | 11.7                                     | 3.8                                           | 0.3                                                 | 7.7                                |
| Bosnia and Herzegovina | 3.3                                      | 0.4                                           | -                                                   | 2.9                                |
| Botswana               | 2.4                                      | 0.9                                           | -                                                   | 1.4                                |

|                                  |        |       |      |        |
|----------------------------------|--------|-------|------|--------|
| Brazil                           | 212.6  | 35.0  | 3.0  | 174.6  |
| Brunei                           | 0.4    | 0.1   | 0.0  | 0.4    |
| Bulgaria                         | 6.9    | 0.8   | -    | 6.2    |
| Burkina Faso                     | 20.9   | 10.7  | -    | 10.2   |
| Burundi                          | 11.9   | 11.4  | -    | 1.7    |
| Cabo Verde                       | 0.6    | 0.2   | -    | 0.4    |
| Cambodia                         | 16.7   | 2.1   | -    | 14.6   |
| Cameroon                         | 26.5   | 12.9  | -    | 13.6   |
| Canada                           | 37.7   | 4.8   | 0.4  | 32.6   |
| Central African Republic         | 4.8    | 4.7   | -    | 0.8    |
| Chad                             | 16.4   | 6.4   | -    | 10.1   |
| Chile                            | 19.1   | 1.4   | 0.2  | 17.5   |
| China                            | 1439.3 | 204.8 | 15.7 | 1218.8 |
| Colombia                         | 50.9   | 8.9   | 0.8  | 41.2   |
| Comoros                          | 0.9    | 0.4   | -    | 0.5    |
| Congo                            | 5.5    | 2.6   | -    | 2.9    |
| Cook Islands                     | 0.0    | 0.0   | 0.0  | 0.0    |
| Costa Rica                       | 5.1    | 0.8   | -    | 4.2    |
| Cote d'Ivoire                    | 26.4   | 12.7  | -    | 13.6   |
| Croatia                          | 4.1    | 0.6   | 0.0  | 3.4    |
| Cuba                             | 11.3   | 0.2   | -    | 11.1   |
| Cyprus                           | 1.2    | 0.2   | -    | 1.0    |
| Czechia                          | 10.7   | 1.3   | 0.1  | 9.2    |
| Democratic Republic of the Congo | 89.6   | 83.4  | -    | 15.5   |
| Denmark                          | 5.8    | 0.7   | 0.1  | 5.0    |
| Djibouti                         | 1.0    | 0.3   | -    | 0.6    |
| Dominica                         | 0.1    | 0.0   | -    | 0.1    |
| Dominican Republic               | 10.8   | 2.4   | 0.2  | 8.2    |
| Ecuador                          | 17.6   | 3.9   | -    | 13.7   |
| Egypt                            | 102.3  | 40.0  | -    | 62.3   |
| El Salvador                      | 6.5    | 0.7   | 0.1  | 5.7    |
| Equatorial Guinea                | 1.4    | 0.6   | -    | 0.8    |
| Eritrea                          | 3.5    | -     | -    | -      |

|               |        |       |      |       |
|---------------|--------|-------|------|-------|
| Estonia       | 1.3    | 0.2   | 0.0  | 1.1   |
| Eswatini      | 1.2    | 0.3   | -    | 0.8   |
| Ethiopia      | 115.0  | 87.8  | -    | 27.1  |
| Fiji          | 0.9    | 0.3   | 0.0  | 0.6   |
| Finland       | 5.5    | 0.7   | 0.0  | 4.8   |
| France        | 65.3   | 9.1   | 13.8 | 42.3  |
| Gabon         | 2.2    | 0.7   | -    | 1.5   |
| Gambia        | 2.4    | 2.4   | -    | 0.3   |
| Georgia       | 4.0    | 0.9   | 0.1  | 3.0   |
| Germany       | 83.8   | 9.4   | 0.8  | 73.6  |
| Ghana         | 31.1   | 13.5  | -    | 17.6  |
| Greece        | 10.4   | 1.1   | -    | 9.3   |
| Grenada       | 0.1    | 0.0   | 0.0  | 0.1   |
| Guatemala     | 17.9   | 7.1   | 0.4  | 10.3  |
| Guinea        | 13.1   | 6.6   | -    | 6.5   |
| Guinea-Bissau | 2.0    | 1.0   | -    | 1.0   |
| Guyana        | 0.8    | 0.3   | -    | 0.5   |
| Haiti         | 11.4   | 4.4   | -    | 7.0   |
| Honduras      | 9.9    | 3.0   | 0.2  | 6.7   |
| Hungary       | 9.7    | 1.1   | 0.1  | 8.5   |
| Iceland       | 0.3    | 0.1   | 0.0  | 0.3   |
| India         | 1380.0 | 436.9 | 24.6 | 918.5 |
| Indonesia     | 273.5  | 57.2  | 4.9  | 211.3 |
| Iran          | 84.0   | 24.1  | -    | 59.8  |
| Iraq          | 40.2   | 17.7  | -    | 22.5  |
| Ireland       | 4.9    | 0.8   | 0.1  | 4.1   |
| Israel        | 8.7    | 2.0   | 0.2  | 6.5   |
| Italy         | 60.5   | 6.1   | 0.4  | 53.9  |
| Jamaica       | 3.0    | 0.7   | 0.0  | 2.2   |
| Japan         | 126.5  | 12.4  | 0.9  | 113.1 |
| Jordan        | 10.2   | 2.7   | 0.2  | 7.3   |
| Kazakhstan    | 18.8   | 4.6   | -    | 14.2  |
| Kenya         | 53.8   | 24.4  | -    | 29.3  |
| Kiribati      | 0.1    | 0.0   | -    | 0.1   |
| Kuwait        | 4.3    | 0.7   | -    | 3.5   |
| Kyrgyzstan    | 6.5    | 2.4   | 0.2  | 3.9   |
| Laos          | 7.3    | 2.6   | 0.2  | 4.5   |

|                  |       |      |      |       |
|------------------|-------|------|------|-------|
| Latvia           | 1.9   | 0.2  | 0.0  | 1.6   |
| Lebanon          | 6.8   | 1.8  | 0.1  | 4.9   |
| Lesotho          | 2.1   | 0.7  | -    | 1.4   |
| Liberia          | 5.1   | 2.4  | -    | 2.7   |
| Libya            | 6.9   | 2.3  | 0.1  | 4.5   |
| Lithuania        | 2.7   | 0.4  | -    | 2.4   |
| Luxembourg       | 0.6   | 0.1  | -    | 0.5   |
| Macedonia        | 2.1   | 0.3  | -    | 1.8   |
| Madagascar       | 27.7  | 12.9 | -    | 14.8  |
| Malawi           | 19.1  | 9.6  | -    | 9.6   |
| Malaysia         | 32.4  | 6.1  | 0.8  | 25.5  |
| Maldives         | 0.5   | 0.1  | -    | 0.5   |
| Mali             | 20.3  | 10.9 | -    | 9.3   |
| Malta            | 0.4   | 0.1  | 0.0  | 0.4   |
| Marshall Islands | 0.1   | 0.0  | -    | 0.0   |
| Mauritania       | 4.6   | 1.5  | -    | 3.1   |
| Mauritius        | 1.3   | 0.2  | -    | 1.1   |
| Mexico           | 128.9 | 26.6 | 29.8 | 72.5  |
| Micronesia       | 0.1   | 0.0  | -    | 0.1   |
| Moldova          | 4.0   | 0.8  | -    | 3.3   |
| Monaco           | 0.0   | 0.0  | -    | 0.0   |
| Mongolia         | 3.3   | 0.9  | -    | 2.4   |
| Montenegro       | 0.6   | 0.1  | 0.0  | 0.5   |
| Morocco          | 36.9  | 8.0  | 0.7  | 28.2  |
| Mozambique       | 31.3  | 13.8 | 1.2  | 16.3  |
| Myanmar          | 54.4  | 46.4 | -    | 8.0   |
| Namibia          | 2.5   | 1.1  | -    | 1.5   |
| Nauru            | 0.0   | 0.0  | -    | 0.0   |
| Nepal            | 29.1  | 10.3 | -    | 18.9  |
| Netherlands      | 17.1  | 2.1  | -    | 15.0  |
| New Zealand      | 4.8   | 0.7  | 0.1  | 4.0   |
| Nicaragua        | 6.6   | 2.3  | -    | 4.3   |
| Niger            | 24.2  | 13.7 | -    | 10.5  |
| Nigeria          | 206.1 | 94.3 | 7.8  | 104.0 |
| Niue             | 0.0   | 0.0  | -    | 0.0   |
| North Korea      | 25.8  | -    | -    | -     |
| Norway           | 5.4   | 0.7  | -    | 4.7   |

|                                  |       |      |     |       |
|----------------------------------|-------|------|-----|-------|
| Oman                             | 5.1   | 1.0  | -   | 4.1   |
| Pakistan                         | 220.9 | 63.1 | 6.2 | 151.6 |
| Palau                            | 0.0   | 0.0  | -   | 0.0   |
| Panama                           | 4.3   | 0.9  | -   | 3.4   |
| Papua New Guinea                 | 8.9   | 3.7  | -   | 5.2   |
| Paraguay                         | 7.1   | 2.5  | -   | 4.7   |
| Peru                             | 33.0  | 9.6  | -   | 23.4  |
| Philippines                      | 109.6 | 26.5 | 2.3 | 80.9  |
| Poland                           | 37.8  | 4.6  | 1.0 | 32.2  |
| Portugal                         | 10.2  | 1.0  | 0.1 | 9.1   |
| Qatar                            | 2.9   | 0.3  | 0.0 | 2.5   |
| Romania                          | 19.2  | 2.3  | -   | 16.9  |
| Russia                           | 145.9 | 31.2 | 1.7 | 113.1 |
| Rwanda                           | 13.0  | 5.9  | 0.4 | 6.6   |
| Saint Kitts and Nevis            | 0.1   | 0.0  | 0.0 | 0.0   |
| Saint Lucia                      | 0.2   | 0.0  | -   | 0.2   |
| Saint Vincent and the Grenadines | 0.1   | 0.0  | -   | 0.1   |
| Samoa                            | 0.2   | 0.1  | 0.0 | 0.1   |
| San Marino                       | 0.0   | 0.0  | 0.0 | 0.0   |
| Sao Tome and Principe            | 0.2   | 0.1  | -   | 0.1   |
| Saudi Arabia                     | 34.8  | 7.1  | 1.2 | 26.6  |
| Senegal                          | 16.7  | 8.2  | -   | 8.5   |
| Serbia                           | 8.7   | 1.0  | -   | 7.7   |
| Seychelles                       | 0.1   | 0.0  | -   | 0.1   |
| Sierra Leone                     | 8.0   | 3.8  | -   | 4.2   |
| Singapore                        | 5.9   | 0.6  | 0.1 | 5.2   |
| Slovakia                         | 5.5   | 0.7  | 0.1 | 4.7   |
| Slovenia                         | 2.1   | 0.3  | 0.6 | 1.3   |
| Solomon Islands                  | 0.7   | 0.3  | -   | 0.4   |
| Somalia                          | 15.9  | 8.5  | -   | 7.4   |
| South Africa                     | 59.3  | 13.8 | -   | 45.5  |
| South Korea                      | 51.3  | 7.8  | 0.3 | 43.1  |
| South Sudan                      | 11.2  | 5.4  | -   | 5.8   |

|                         |       |      |     |       |
|-------------------------|-------|------|-----|-------|
| Spain                   | 46.8  | 5.2  | 0.4 | 41.2  |
| Sri Lanka               | 21.4  | 4.0  | 0.3 | 17.0  |
| Sudan                   | 43.8  | 20.4 | -   | 23.4  |
| Suriname                | 0.6   | 0.2  | 0.0 | 0.4   |
| Sweden                  | 10.1  | 1.4  | 0.1 | 8.6   |
| Switzerland             | 8.7   | 1.0  | 0.1 | 7.5   |
| Syria                   | 17.5  | 6.3  | -   | 11.2  |
| Tajikistan              | 9.5   | 4.0  | -   | 5.5   |
| Tanzania                | 59.7  | 30.0 | -   | 29.7  |
| Thailand                | 69.8  | 9.1  | -   | 60.7  |
| Timor-Leste             | 1.3   | 0.6  | -   | 0.7   |
| Togo                    | 8.3   | 4.3  | -   | 4.0   |
| Tonga                   | 0.1   | 0.0  | -   | 0.1   |
| Trinidad and<br>Tobago  | 1.4   | 0.2  | 0.0 | 1.2   |
| Tunisia                 | 11.8  | 3.3  | -   | 8.5   |
| Turkey                  | 84.3  | 16.1 | 1.4 | 66.9  |
| Turkmenistan            | 6.0   | 2.2  | -   | 3.9   |
| Tuvalu                  | 0.0   | 0.0  | -   | 0.0   |
| Uganda                  | 45.7  | 17.4 | -   | 28.3  |
| Ukraine                 | 43.7  | 5.6  | 0.4 | 37.8  |
| United Arab<br>Emirates | 9.9   | 0.3  | 0.1 | 9.5   |
| United Kingdom          | 67.9  | 9.7  | 0.7 | 57.5  |
| United States           | 331.0 | 48.1 | 3.8 | 279.1 |
| Uruguay                 | 3.5   | 0.6  | 0.0 | 2.9   |
| Uzbekistan              | 33.5  | 7.9  | -   | 25.5  |
| Vanuatu                 | 0.3   | 0.1  | -   | 0.2   |
| Venezuela               | 28.4  | 9.3  | -   | 19.1  |
| Vietnam                 | 97.3  | 18.4 | -   | 79.0  |
| Yemen                   | 29.8  | 13.5 | -   | 16.3  |
| Zambia                  | 18.4  | 9.4  | -   | 9.0   |
| Zimbabwe                | 14.9  | 5.9  | -   | 9.0   |

Abbreviation: AFR, African Region; AMR, Region of Americas; EMR, Eastern Mediterranean Region; EUR, European Region; SEAR, South-East Asia Region; WPR, Western Pacific Region.

## **COVID-19 vaccine coverage**

### ***Metrics included in the dataset of administered doses***

- (1) **Number of vaccine doses administered.** The cumulative administered number of COVID-19 vaccine doses stratified by time, vaccine technical platform, and age group, which might include initial doses, additional doses, and booster doses.
- (2) **The number of people vaccinated at least one dose.** The number of people who have received the first dose of a multiple-dose vaccine or the dose administered for a one-dose vaccine.
- (3) **The number of people fully vaccinated.** The number of people who have completed their primary immunization series according to the vaccination schedule.
- (4) **The number of people receiving additional/booster doses.** The number of cumulative people receiving additional or/and booster doses.

**Figure S1. Proportion administered by vaccine technical platforms**

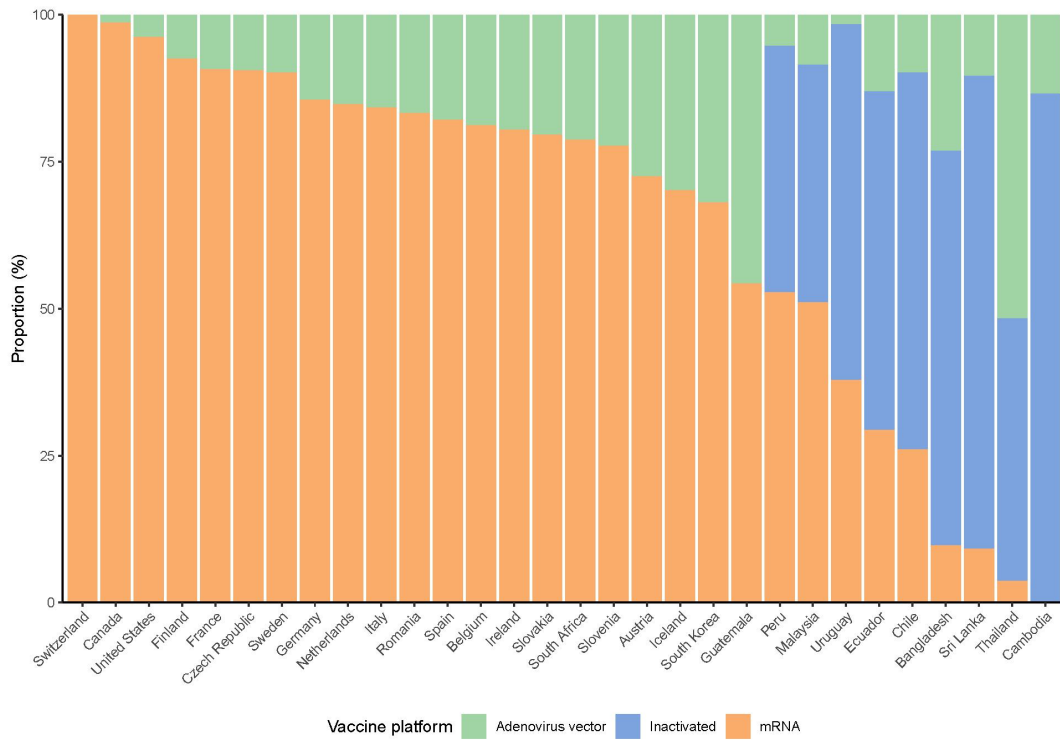



**Figure S2. Proportion administered by vaccine types.**

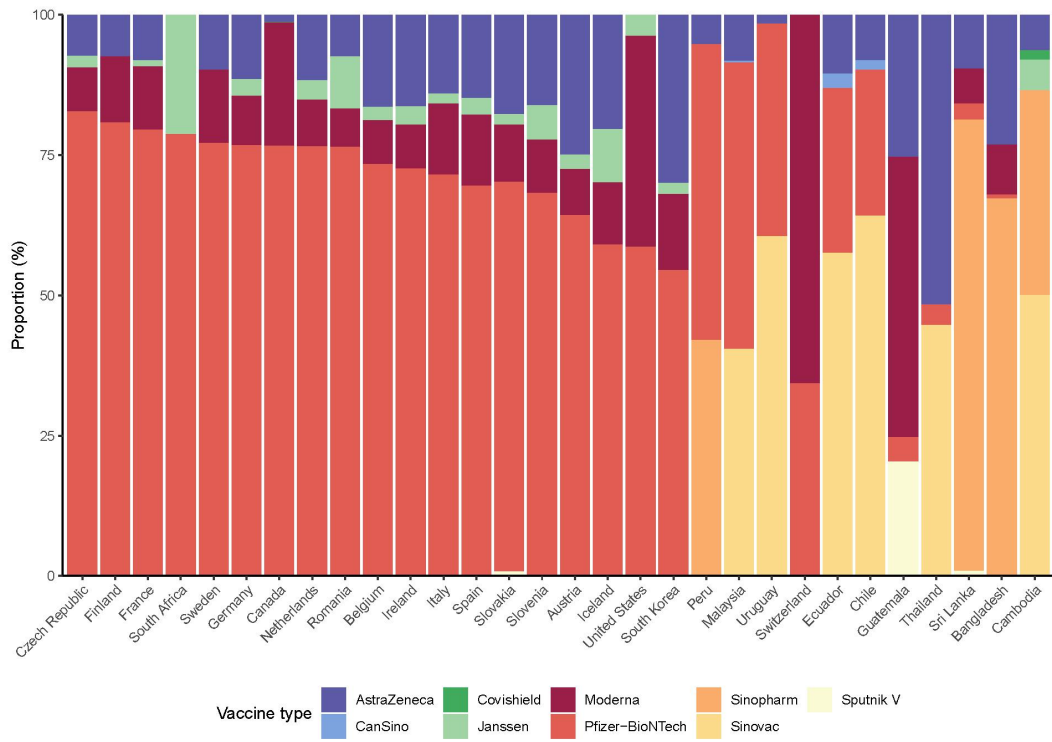

**Figure S3. Date at which achieved one dose per 100 people in total population by countries.**

The white areas represent countries that have not achieved one dose per 100 people or for which data are unavailable. The data shown here are as of October 7, 2021.

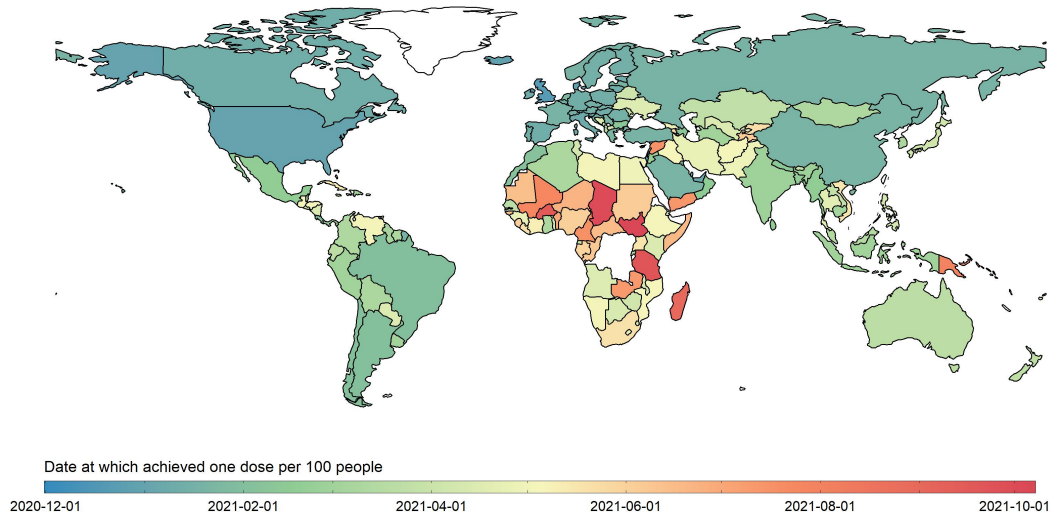

**Figure S4. Vaccine coverage over time stratified by income groups and role of vaccine seller/donor or recipient.**

Cumulative doses per 100 people by income group in total population (A) and target population (B). Cumulative doses per 100 people by role of vaccine seller/donor or recipient in total population (C) and target population (D). Income group was defined by the World Bank. The data on role of vaccine seller/donor or recipient was derived from COVAX.

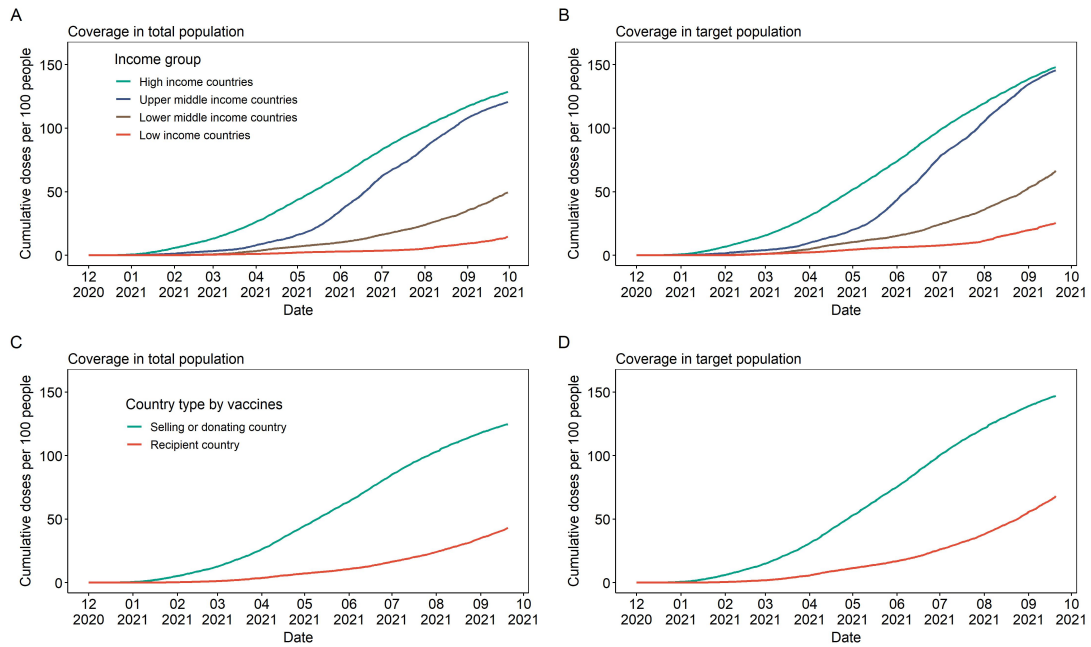

**Figure S5. Vaccine coverage stratified by SDI quintile and WHO region.**

SDI, socio-demographic index from the Institute for Health Metrics and Evaluation (IHME)<sup>10</sup>.

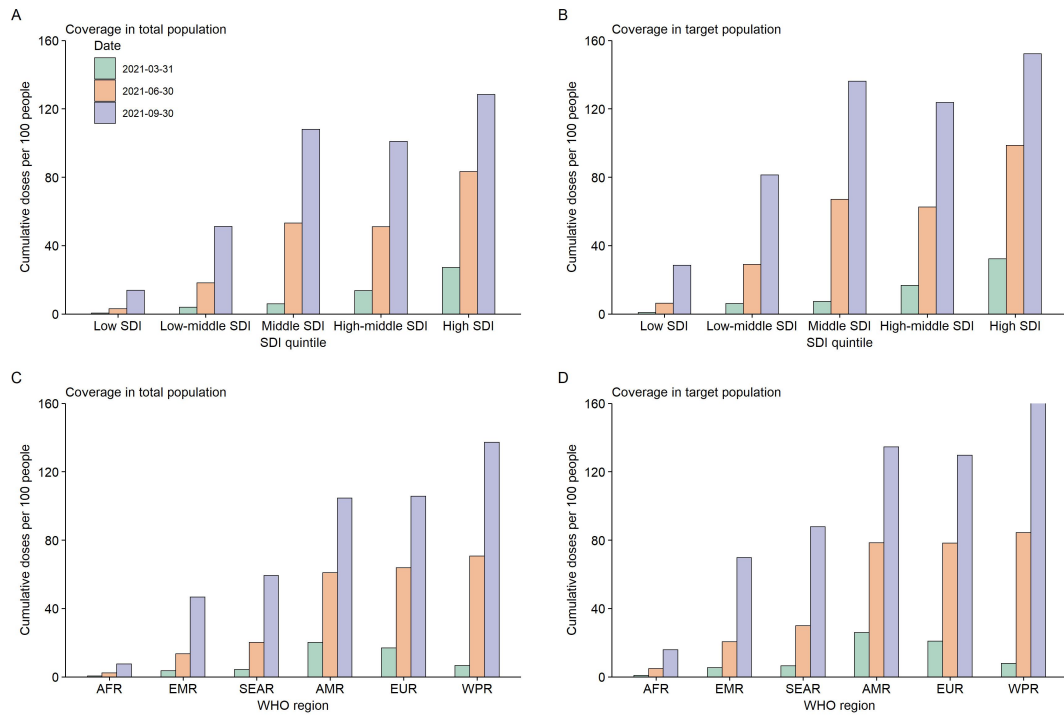

**Figure S6. Corrections between vaccine coverage and country-level vaccine acceptance.**

Data on country-specific vaccine acceptance among general population was summarized through a rapid review by selecting one representative study for each country, based on comprehensive evaluation about study period, sampling method and representativeness of study participants.

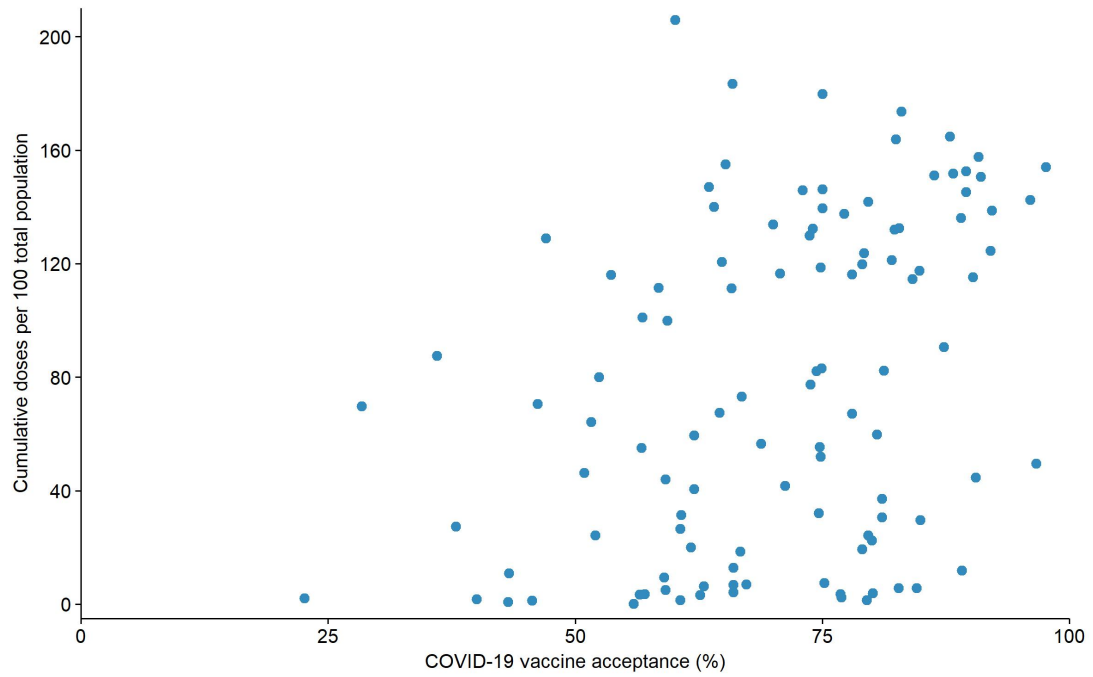

## **Demand of COVID-19 vaccine doses**

### ***Method to calculate the demand of COVID-19 vaccine doses***

In primary immunization, we assumed a two-dose schedule to get the total doses required for primary immunization of target population. With an exception of previous infected COVID-19 patients, if countries recommended 1 dose for those groups, one-dose schedule was used instead. The target population for primary immunization was presented in Table S2.

In additional/booster immunization programs, we assumed a one-dose schedule for those target population recommended by each country, respectively (Table S3). Generally, the target groups for an additional dose mainly contained some specific population groups, e.g., people undergoing immunosuppression, and/or elderly, and/or specific population groups at high risk of infection (such as international travelers, front-line workers). While the target groups for a booster dose may include people with specific age, and/or people undergoing immunosuppression, and/or frontline workers, and/or people receiving Sinovac/Sinopharm vaccine.

By multiplying the number of specific target population and required doses, we obtained the doses required for primary and additional/booster immunization programs, respectively. Finally, we subtracted cumulative primary doses and additional/booster doses administered in each country to get the demand of COVID-19 vaccine doses for primary and additional/booster immunization programs, respectively (Table S7).

**Table S7. Global, regional, and national demand of vaccine dose.**

| Locations           | Doses required for vaccination (millions) |               |                              | Administered doses for vaccination (millions) |               |                              | Current demand doses (millions) |               |                              |
|---------------------|-------------------------------------------|---------------|------------------------------|-----------------------------------------------|---------------|------------------------------|---------------------------------|---------------|------------------------------|
|                     | Total                                     | Primary doses | Additional/<br>booster doses | Total                                         | Primary doses | Additional/<br>booster doses | Total                           | Primary doses | Additional/<br>Booster doses |
| Global              |                                           |               |                              |                                               |               |                              |                                 |               |                              |
| Total               | 11956.9                                   | 11031.3       | 925.7                        | 6427.2                                        | 6382.4        | 44.7                         | 5537.4                          | 4650.4        | 887.0                        |
| WHO region          |                                           |               |                              |                                               |               |                              |                                 |               |                              |
| AFR                 | 1064.6                                    | 1062.1        | 2.5                          | 86.9                                          | 86.9          | -                            | 976.1                           | 973.6         | 2.5                          |
| AMR                 | 1760.4                                    | 1582.2        | 178.3                        | 1094.0                                        | 1073.5        | 20.5                         | 672.1                           | 508.7         | 163.4                        |
| EMR                 | 966.0                                     | 952.2         | 13.8                         | 323.8                                         | 323.5         | 0.3                          | 636.4                           | 623.0         | 13.5                         |
| EUR                 | 1854.9                                    | 1501.2        | 353.7                        | 993.1                                         | 972.1         | 21.0                         | 870.7                           | 538.0         | 332.7                        |
| SEAR                | 2758.4                                    | 2694.9        | 63.4                         | 1244.9                                        | 1243.3        | 1.6                          | 1513.4                          | 1451.6        | 61.8                         |
| WPR                 | 3552.7                                    | 3238.7        | 314.0                        | 2684.3                                        | 2683.1        | 1.3                          | 868.6                           | 555.6         | 313.1                        |
| Countries           |                                           |               |                              |                                               |               |                              |                                 |               |                              |
| Afghanistan         | 39.6                                      | 39.6          | -                            | 2.5                                           | 2.5           | -                            | 37.1                            | 37.1          | -                            |
| Albania             | 6.0                                       | 4.5           | 1.5                          | 1.8                                           | 1.8           | -                            | 4.2                             | 2.7           | 1.5                          |
| Algeria             | 57.1                                      | 57.1          | -                            | 10.6                                          | 10.6          | -                            | 46.5                            | 46.5          | -                            |
| Andorra             | 0.2                                       | 0.1           | 0.0                          | 0.1                                           | 0.1           | -                            | 0.1                             | 0.0           | 0.0                          |
| Angola              | 30.8                                      | 30.8          | -                            | 4.2                                           | 4.2           | -                            | 26.6                            | 26.6          | -                            |
| Antigua and Barbuda | 0.2                                       | 0.2           | -                            | 0.1                                           | 0.1           | -                            | 0.1                             | 0.1           | -                            |
| Argentina           | 71.1                                      | 71.1          | -                            | 53.6                                          | 53.6          | -                            | 17.4                            | 17.4          | -                            |

|                           |       |       |      |       |       |     |       |       |      |
|---------------------------|-------|-------|------|-------|-------|-----|-------|-------|------|
| Armenia                   | 4.4   | 4.4   | -    | 0.5   | 0.5   | -   | 3.9   | 3.9   | -    |
| Australia                 | 43.2  | 42.4  | 0.8  | 29.6  | 29.6  | -   | 13.6  | 12.8  | 0.8  |
| Austria                   | 24.0  | 15.8  | 8.3  | 10.9  | 10.9  | -   | 13.1  | 4.8   | 8.3  |
| Azerbaijan                | 17.2  | 15.9  | 1.3  | 8.9   | 8.9   | -   | 8.3   | 7.0   | 1.3  |
| Bahrain                   | 4.2   | 2.8   | 1.3  | 2.6   | 2.3   | 0.3 | 1.5   | 0.5   | 1.0  |
| Bangladesh                | 222.6 | 222.6 | -    | 52.9  | 52.9  | -   | 169.6 | 169.6 | -    |
| Barbados                  | 0.5   | 0.5   | 0.0  | 0.3   | 0.3   | -   | 0.3   | 0.2   | 0.0  |
| Belarus                   | 14.9  | 14.9  | -    | 4.1   | 4.1   | -   | 10.7  | 10.7  | -    |
| Belgium                   | 23.3  | 19.8  | 3.5  | 16.9  | 16.7  | 0.2 | 6.4   | 3.1   | 3.3  |
| Belize                    | 0.6   | 0.6   | -    | 0.3   | 0.3   | -   | 0.3   | 0.3   | -    |
| Benin                     | 12.5  | 12.5  | -    | 0.2   | 0.2   | -   | 12.2  | 12.2  | -    |
| Bhutan                    | 1.2   | 1.2   | -    | 1.1   | 1.1   | -   | 0.1   | 0.1   | -    |
| Bolivia                   | 15.3  | 15.3  | -    | 6.9   | 6.9   | -   | 8.4   | 8.4   | -    |
| Bosnia and<br>Herzegovina | 5.8   | 5.8   | -    | 1.2   | 1.2   | -   | 4.6   | 4.6   | -    |
| Botswana                  | 2.9   | 2.9   | -    | 0.7   | 0.7   | -   | 2.2   | 2.2   | -    |
| Brazil                    | 382.7 | 349.3 | 33.4 | 245.1 | 243.0 | 2.1 | 137.6 | 106.3 | 31.3 |
| Brunei                    | 0.7   | 0.7   | 0.0  | 0.5   | 0.5   | -   | 0.2   | 0.2   | 0.0  |
| Bulgaria                  | 14.1  | 12.3  | 1.8  | 2.6   | 2.6   | -   | 11.6  | 9.7   | 1.8  |
| Burkina Faso              | 20.4  | 20.4  | -    | 0.3   | 0.3   | -   | 20.1  | 20.1  | -    |
| Burundi                   | 3.5   | 3.5   | -    | 0.0   | 0.0   | -   | 3.5   | 3.5   | -    |
| Cambodia                  | 39.8  | 29.2  | 10.7 | 24.4  | 23.5  | 0.9 | 15.4  | 5.6   | 9.8  |



|                                  |        |        |       |        |        |     |       |       |       |
|----------------------------------|--------|--------|-------|--------|--------|-----|-------|-------|-------|
| Cameroon                         | 27.2   | 27.2   | -     | 0.5    | 0.5    | -   | 26.7  | 26.7  | -     |
| Canada                           | 66.9   | 65.2   | 1.7   | 56.8   | 56.8   | -   | 10.0  | 8.3   | 1.7   |
| Cabo Verde                       | 0.7    | 0.7    | -     | 0.4    | 0.4    | -   | 0.3   | 0.3   | -     |
| Central African Republic         | 1.5    | 1.5    | -     | 0.2    | 0.2    | -   | 1.3   | 1.3   | -     |
| Chad                             | 20.1   | 20.1   | -     | 0.2    | 0.2    | -   | 19.9  | 19.9  | -     |
| Chile                            | 45.4   | 34.9   | 10.5  | 33.2   | 29.5   | 3.7 | 12.2  | 5.4   | 6.7   |
| China                            | 2713.2 | 2437.5 | 275.7 | 2217.6 | 2217.6 | -   | 495.6 | 220.0 | 275.7 |
| Colombia                         | 94.4   | 82.4   | 12.0  | 42.3   | 42.3   | 0.0 | 52.1  | 40.1  | 12.0  |
| Comoros                          | 1.0    | 1.0    | -     | 0.4    | 0.4    | -   | 0.6   | 0.6   | -     |
| Congo                            | 5.8    | 5.8    | -     | 0.4    | 0.4    | -   | 5.4   | 5.4   | -     |
| Cook Islands                     | 0.0    | 0.0    | -     | 0.0    | 0.0    | -   | 0.0   | 0.0   | -     |
| Costa Rica                       | 8.5    | 8.5    | -     | 5.8    | 5.8    | -   | 2.7   | 2.7   | -     |
| Cote d'Ivoire                    | 27.3   | 27.3   | -     | 2.5    | 2.5    | -   | 24.8  | 24.8  | -     |
| Croatia                          | 6.9    | 6.9    | -     | 3.5    | 3.5    | -   | 3.4   | 3.4   | -     |
| Cuba                             | 22.2   | 22.2   | -     | 22.3   | 16.7   | 5.7 | 5.6   | 5.6   | -     |
| Cyprus                           | 2.5    | 2.1    | 0.4   | 1.2    | 1.2    | 0.0 | 1.3   | 0.9   | 0.4   |
| Czechia                          | 28.1   | 18.5   | 9.6   | 11.9   | 11.8   | 0.0 | 16.3  | 6.7   | 9.6   |
| Democratic Republic of the Congo | 31.0   | 31.0   | -     | 0.1    | 0.1    | -   | 30.9  | 30.9  | -     |

|                    |       |       |      |       |       |     |       |       |      |
|--------------------|-------|-------|------|-------|-------|-----|-------|-------|------|
| Denmark            | 11.6  | 10.0  | 1.6  | 8.8   | 8.7   | 0.1 | 2.7   | 1.2   | 1.5  |
| Djibouti           | 1.3   | 1.3   | -    | 0.1   | 0.1   | -   | 1.2   | 1.2   | -    |
| Dominica           | 0.1   | 0.1   | -    | 0.0   | 0.0   | -   | 0.1   | 0.1   | -    |
| Dominican Republic | 24.9  | 16.5  | 8.5  | 12.1  | 11.1  | 1.0 | 12.9  | 5.4   | 7.5  |
| Ecuador            | 27.6  | 27.5  | 0.1  | 21.2  | 21.2  | -   | 6.4   | 6.3   | 0.1  |
| Egypt              | 124.7 | 124.7 | -    | 19.8  | 19.8  | -   | 104.9 | 104.9 | -    |
| El Salvador        | 15.8  | 11.4  | 4.4  | 7.9   | 7.7   | 0.2 | 7.9   | 3.6   | 4.2  |
| Equatorial Guinea  | 1.6   | 1.6   | -    | 0.4   | 0.4   | -   | 1.2   | 1.2   | -    |
| Eritrea            | -     | -     | -    | -     | -     | -   | -     | -     | -    |
| Estonia            | 3.2   | 2.1   | 1.1  | 1.5   | 1.5   | -   | 1.7   | 0.6   | 1.1  |
| Eswatini           | 1.6   | 1.6   | -    | -     | -     | -   | -     | -     | -    |
| Ethiopia           | 54.3  | 54.3  | -    | 3.9   | 3.9   | -   | 50.4  | 50.4  | -    |
| Fiji               | 1.2   | 1.2   | -    | 1.1   | 1.1   | -   | 0.2   | 0.2   | -    |
| Finland            | 9.9   | 9.5   | 0.4  | 7.8   | 7.8   | -   | 2.1   | 1.7   | 0.4  |
| France             | 98.1  | 77.8  | 20.3 | 96.0  | 94.5  | 1.5 | 18.9  | 0.0   | 18.9 |
| Gabon              | 3.1   | 3.1   | -    | 0.2   | 0.2   | -   | 2.9   | 2.9   | -    |
| Georgia            | 6.0   | 6.0   | -    | 1.8   | 1.8   | -   | 4.1   | 4.1   | -    |
| Germany            | 159.0 | 142.9 | 16.1 | 108.8 | 107.9 | 1.0 | 50.1  | 35.0  | 15.1 |
| Ghana              | 35.2  | 35.2  | -    | 2.2   | 2.2   | -   | 33.0  | 33.0  | -    |
| Greece             | 21.8  | 18.7  | 3.1  | 12.3  | 12.3  | -   | 9.5   | 6.4   | 3.1  |

|               |        |        |      |       |       |     |       |       |      |
|---------------|--------|--------|------|-------|-------|-----|-------|-------|------|
| Grenada       | 0.2    | 0.2    | -    | 0.1   | 0.1   | -   | 0.1   | 0.1   | -    |
| Guatemala     | 20.7   | 20.7   | -    | 7.5   | 7.5   | -   | 13.2  | 13.2  | -    |
| Guinea        | 13.1   | 13.1   | -    | 1.9   | 1.9   | -   | 11.2  | 11.2  | -    |
| Guinea-Bissau | 2.0    | 2.0    | -    | 0.1   | 0.1   | -   | 1.9   | 1.9   | -    |
| Guyana        | 1.0    | 1.0    | -    | 0.6   | 0.6   | -   | 0.5   | 0.5   | -    |
| Haiti         | 14.0   | 14.0   | -    | 0.1   | 0.1   | -   | 13.9  | 13.9  | -    |
| Honduras      | 13.3   | 13.3   | -    | 5.9   | 5.9   | -   | 7.4   | 7.4   | -    |
| Hungary       | 24.9   | 16.9   | 8.0  | 12.5  | 11.6  | 0.9 | 12.5  | 5.4   | 7.1  |
| Iceland       | 0.7    | 0.6    | 0.1  | 0.6   | 0.5   | 0.1 | 0.1   | 0.1   | 0.0  |
| India         | 1836.9 | 1836.9 | -    | 927.2 | 927.2 | -   | 909.7 | 909.7 | -    |
| Indonesia     | 423.4  | 422.7  | 0.8  | 151.5 | 151.5 | -   | 272.0 | 271.2 | 0.8  |
| Iran          | 119.7  | 119.7  | -    | 61.5  | 61.5  | -   | 58.2  | 58.2  | -    |
| Iraq          | 45.0   | 45.0   | -    | 8.1   | 8.1   | -   | 36.9  | 36.9  | -    |
| Ireland       | 8.8    | 8.1    | 0.7  | 7.5   | 7.5   | -   | 1.3   | 0.6   | 0.7  |
| Israel        | 19.7   | 13.0   | 6.7  | 15.6  | 11.9  | 3.7 | 4.1   | 1.1   | 3.0  |
| Italy         | 133.5  | 107.8  | 25.7 | 85.8  | 85.7  | 0.1 | 47.7  | 22.1  | 25.6 |
| Jamaica       | 4.4    | 4.4    | -    | 0.8   | 0.8   | -   | 3.6   | 3.6   | -    |
| Japan         | 226.3  | 226.3  | -    | 172.1 | 172.1 | -   | 54.2  | 54.2  | -    |
| Jordan        | 14.6   | 14.6   | -    | 7.1   | 7.1   | -   | 7.5   | 7.5   | -    |
| Kazakhstan    | 42.6   | 28.4   | 14.2 | 14.6  | 14.6  | -   | 28.1  | 13.9  | 14.2 |
| Kenya         | 58.6   | 58.6   | -    | 4.0   | 4.0   | -   | 54.6  | 54.6  | -    |

|                     |      |      |      |      |      |     |      |      |      |
|---------------------|------|------|------|------|------|-----|------|------|------|
| Kiribati            | 0.1  | 0.1  | -    | 0.0  | 0.0  | -   | 0.1  | 0.1  | -    |
| Kuwait              | 10.3 | 7.1  | 3.2  | -    | -    | -   | 3.2  | -    | 3.2  |
| Kyrgyzstan          | 7.8  | 7.8  | -    | 1.5  | 1.5  | -   | 6.3  | 6.3  | -    |
| Laos                | 9.0  | 9.0  | -    | 5.2  | 5.2  | -   | 3.8  | 3.8  | -    |
| Latvia              | 3.5  | 3.1  | 0.5  | 1.6  | 1.6  | -   | 1.9  | 1.5  | 0.5  |
| Lebanon             | 10.1 | 9.8  | 0.3  | 3.0  | 3.0  | -   | 7.1  | 6.8  | 0.3  |
| Lesotho             | 2.8  | 2.8  | -    | 0.4  | 0.4  | -   | 2.4  | 2.4  | -    |
| Liberia             | 5.3  | 5.3  | -    | 0.1  | 0.1  | -   | 5.3  | 5.3  | -    |
| Libya               | 9.0  | 9.0  | -    | 1.7  | 1.7  | -   | 7.3  | 7.3  | -    |
| Lithuania           | 5.8  | 4.7  | 1.1  | 3.3  | 3.2  | 0.0 | 2.6  | 1.5  | 1.0  |
| Luxembourg          | 1.2  | 1.1  | 0.1  | 0.8  | 0.8  | 0.0 | 0.4  | 0.3  | 0.1  |
| Macedonia           | 4.1  | 3.6  | 0.5  | 1.5  | 1.5  | 0.0 | 2.5  | 2.1  | 0.5  |
| Madagascar          | 29.5 | 29.5 | -    | 0.4  | 0.4  | -   | 29.1 | 29.1 | -    |
| Malawi              | 19.1 | 19.1 | -    | 1.1  | 1.1  | -   | 18.0 | 18.0 | -    |
| Malaysia            | 74.1 | 50.9 | 23.2 | 46.1 | 46.1 | 0.0 | 28.0 | 4.8  | 23.2 |
| Maldives            | 0.9  | 0.9  | -    | 0.7  | 0.7  | -   | 0.2  | 0.2  | -    |
| Mali                | 18.6 | 18.6 | -    | 0.5  | 0.5  | -   | 18.2 | 18.2 | -    |
| Malta               | 0.9  | 0.8  | 0.1  | 0.8  | 0.8  | 0.0 | 0.1  | 0.0  | 0.1  |
| Marshall<br>Islands | 0.1  | 0.1  | -    | 0.0  | 0.0  | 0.0 | 0.0  | 0.0  | -    |
| Mauritania          | 6.2  | 6.2  | -    | 1.2  | 1.2  | -   | 5.0  | 5.0  | -    |
| Mauritius           | 2.2  | 2.2  | -    | 1.7  | 1.7  | -   | 0.5  | 0.5  | -    |

|             |       |       |     |       |       |     |       |       |     |
|-------------|-------|-------|-----|-------|-------|-----|-------|-------|-----|
| Mexico      | 144.9 | 144.9 | -   | 106.1 | 106.1 | -   | 38.8  | 38.8  | -   |
| Micronesia  | 0.2   | 0.2   | 0.0 | 0.1   | 0.1   | -   | 0.1   | 0.1   | 0.0 |
| Moldova     | 6.5   | 6.5   | -   | 1.4   | 1.4   | -   | 5.1   | 5.1   | -   |
| Monaco      | 0.1   | 0.1   | -   | -     | -     | -   | -     | -     | -   |
| Mongolia    | 4.8   | 4.8   | -   | 4.4   | 4.4   | -   | 0.5   | 0.5   | -   |
| Montenegro  | 1.2   | 1.1   | 0.2 | 0.5   | 0.5   | -   | 0.8   | 0.6   | 0.2 |
| Morocco     | 56.3  | 56.3  | -   | 42.8  | 42.8  | -   | 13.5  | 13.5  | -   |
| Mozambique  | 32.6  | 32.6  | -   | 3.7   | 3.7   | -   | 28.9  | 28.9  | -   |
| Myanmar     | 15.9  | 15.9  | -   | 12.3  | 12.3  | -   | 3.7   | 3.7   | -   |
| Namibia     | 2.9   | 2.9   | -   | 0.5   | 0.5   | -   | 2.4   | 2.4   | -   |
| Nauru       | 0.0   | 0.0   | -   | -     | -     | -   | -     | -     | -   |
| Nepal       | 37.7  | 37.7  | -   | 14.4  | 14.4  | -   | 23.3  | 23.3  | -   |
| Netherlands | 28.7  | 28.0  | 0.7 | 23.9  | 23.9  | -   | 4.8   | 4.1   | 0.7 |
| New Zealand | 8.2   | 8.0   | 0.2 | 5.6   | 5.6   | -   | 2.6   | 2.4   | 0.2 |
| Nicaragua   | 8.6   | 8.6   | -   | 1.0   | 1.0   | 0.0 | 7.6   | 7.6   | -   |
| Niger       | 21.1  | 21.1  | -   | 0.6   | 0.6   | -   | 20.4  | 20.4  | -   |
| Nigeria     | 208.0 | 208.0 | -   | 7.1   | 7.1   | -   | 200.9 | 200.9 | -   |
| Niue        | 0.0   | 0.0   | -   | -     | -     | -   | -     | -     | -   |
| North Korea | -     | -     | -   | -     | -     | -   | -     | -     | -   |
| Norway      | 10.4  | 9.4   | 1.0 | 7.9   | 7.9   | -   | 2.5   | 1.5   | 1.0 |
| Oman        | 8.3   | 8.3   | -   | 5.2   | 5.2   | -   | 3.1   | 3.1   | -   |
| Pakistan    | 303.2 | 303.2 | -   | 89.7  | 89.7  | -   | 213.5 | 213.5 | -   |

|                                  |       |       |       |      |      |     |       |       |       |
|----------------------------------|-------|-------|-------|------|------|-----|-------|-------|-------|
| Palau                            | 0.0   | 0.0   | 0.0   | -    | -    | -   | 0.0   | -     | 0.0   |
| Panama                           | 8.2   | 6.8   | 1.4   | 5.2  | 5.2  | -   | 2.9   | 1.5   | 1.4   |
| Papua New Guinea                 | 10.5  | 10.5  | -     | 0.2  | 0.2  | -   | 10.3  | 10.3  | -     |
| Paraguay                         | 9.4   | 9.4   | -     | 4.8  | 4.8  | 0.0 | 4.5   | 4.5   | -     |
| Peru                             | 46.9  | 46.7  | 0.1   | 29.9 | 29.9 | -   | 17.0  | 16.8  | 0.1   |
| Philippines                      | 161.8 | 161.8 | -     | 48.9 | 48.9 | -   | 112.8 | 112.8 | -     |
| Poland                           | 79.8  | 64.4  | 15.4  | 37.8 | 37.8 | -   | 42.0  | 26.6  | 15.4  |
| Portugal                         | 19.7  | 17.1  | 2.7   | 16.1 | 16.1 | -   | 3.7   | 1.0   | 2.7   |
| Qatar                            | 5.9   | 5.1   | 0.8   | 4.7  | 4.7  | -   | 1.1   | 0.3   | 0.8   |
| Romania                          | 50.7  | 33.8  | 16.9  | 10.6 | 10.6 | -   | 40.1  | 23.2  | 16.9  |
| Russia                           | 340.9 | 226.2 | 114.8 | 93.9 | 93.0 | 0.9 | 247.0 | 133.1 | 113.9 |
| Rwanda                           | 13.2  | 13.2  | -     | 3.8  | 3.8  | -   | 9.3   | 9.3   | -     |
| Saint Kitts and Nevis            | 0.1   | 0.1   | -     | 0.0  | 0.0  | 0.0 | 0.0   | 0.0   | -     |
| Saint Lucia                      | 0.3   | 0.3   | -     | 0.1  | 0.1  | -   | 0.2   | 0.2   | -     |
| Saint Vincent and the Grenadines | 0.2   | 0.2   | -     | 0.0  | 0.0  | -   | 0.1   | 0.1   | -     |
| Samoa                            | 0.2   | 0.2   | -     | 0.2  | 0.2  | -   | 0.0   | 0.0   | -     |
| San Marino                       | 0.0   | 0.0   | -     | 0.0  | 0.0  | -   | 0.0   | 0.0   | -     |
| Sao Tome and                     | 0.2   | 0.2   | -     | 0.1  | 0.1  | -   | 0.1   | 0.1   | -     |

|                    |      |      |     |      |      |     |      |      |     |
|--------------------|------|------|-----|------|------|-----|------|------|-----|
| Principe           |      |      |     |      |      |     |      |      |     |
| Saudi Arabia       | 55.2 | 53.2 | 2.0 | 43.1 | 43.1 | -   | 12.1 | 10.1 | 2.0 |
| Senegal            | 17.0 | 17.0 | -   | 1.8  | 1.8  | -   | 15.2 | 15.2 | -   |
| Serbia             | 22.5 | 15.4 | 7.1 | 6.7  | 6.0  | 0.7 | 15.8 | 9.4  | 6.4 |
| Seychelles         | 0.2  | 0.2  | -   | 0.2  | 0.2  | -   | 0.0  | 0.0  | -   |
| Sierra Leone       | 8.4  | 8.4  | -   | 0.3  | 0.3  | -   | 8.1  | 8.1  | -   |
| Singapore          | 10.3 | 10.3 | -   | 9.6  | 9.2  | 0.4 | 1.1  | 1.1  | -   |
| Slovakia           | 14.2 | 9.4  | 4.8 | 4.7  | 4.7  | -   | 9.5  | 4.7  | 4.8 |
| Slovenia           | 3.2  | 2.5  | 0.7 | 2.2  | 2.2  | -   | 1.0  | 0.4  | 0.7 |
| Solomon<br>Islands | 0.7  | 0.7  | -   | 0.1  | 0.1  | -   | 0.6  | 0.6  | -   |
| Somalia            | 14.9 | 14.9 | -   | 0.5  | 0.5  | -   | 14.3 | 14.3 | -   |
| South Africa       | 93.4 | 90.9 | 2.5 | 18.6 | 18.6 | -   | 74.8 | 72.3 | 2.5 |
| South Korea        | 89.6 | 86.2 | 3.4 | 67.7 | 67.7 | 0.0 | 22.0 | 18.5 | 3.4 |
| South Sudan        | 11.7 | 11.7 | -   | 0.1  | 0.1  | -   | 11.5 | 11.5 | -   |
| Spain              | 86.4 | 77.3 | 9.0 | 70.7 | 70.4 | 0.3 | 15.7 | 6.9  | 8.7 |
| Sri Lanka          | 36.0 | 34.1 | 1.9 | 26.7 | 26.7 | -   | 9.3  | 7.4  | 1.9 |
| Sudan              | 46.9 | 46.9 | -   | 1.5  | 1.5  | -   | 45.4 | 45.4 | -   |
| Suriname           | 0.8  | 0.8  | -   | 0.4  | 0.4  | -   | 0.4  | 0.4  | -   |
| Sweden             | 18.1 | 17.1 | 1.0 | 13.9 | 13.9 | -   | 4.2  | 3.2  | 1.0 |
| Switzerland        | 15.3 | 15.0 | 0.3 | 10.6 | 10.6 | -   | 4.7  | 4.4  | 0.3 |
| Syria              | 22.3 | 22.3 | -   | 0.9  | 0.9  | -   | 21.5 | 21.5 | -   |

|                         |       |       |       |       |       |      |       |       |      |
|-------------------------|-------|-------|-------|-------|-------|------|-------|-------|------|
| Tajikistan              | 11.0  | 11.0  | -     | 4.5   | 4.5   | -    | 6.5   | 6.5   | -    |
| Tanzania                | 59.4  | 59.4  | -     | 0.9   | 0.9   | -    | 58.5  | 58.5  | -    |
| Thailand                | 182.2 | 121.5 | 60.7  | 57.4  | 55.8  | 1.6  | 124.9 | 65.7  | 59.1 |
| The Bahamas             | 0.7   | 0.7   | -     | 0.2   | 0.2   | -    | 0.4   | 0.4   | -    |
| The Gambia              | 0.7   | 0.7   | -     | 0.2   | 0.2   | -    | 0.5   | 0.5   | -    |
| Timor-Leste             | 1.5   | 1.5   | -     | 0.8   | 0.8   | -    | 0.7   | 0.7   | -    |
| Togo                    | 8.0   | 8.0   | -     | 1.2   | 1.2   | -    | 6.8   | 6.8   | -    |
| Tonga                   | 0.1   | 0.1   | -     | 0.1   | 0.1   | -    | 0.0   | 0.0   | -    |
| Trinidad and<br>Tobago  | 2.3   | 2.3   | -     | 1.1   | 1.1   | -    | 1.2   | 1.2   | -    |
| Tunisia                 | 20.9  | 17.0  | 3.9   | 8.3   | 8.3   | -    | 12.5  | 8.6   | 3.9  |
| Turkey                  | 154.0 | 133.7 | 20.3  | 111.7 | 100.2 | 11.5 | 42.3  | 33.6  | 8.8  |
| Turkmenistan            | 7.8   | 7.8   | -     | -     | -     | -    | -     | -     | -    |
| Tuvalu                  | 0.0   | 0.0   | -     | -     | -     | -    | -     | -     | -    |
| Uganda                  | 56.6  | 56.6  | -     | 2.6   | 2.6   | -    | 54.0  | 54.0  | -    |
| Ukraine                 | 75.5  | 75.5  | -     | 13.4  | 13.4  | -    | 62.1  | 62.1  | -    |
| United Arab<br>Emirates | 21.2  | 19.0  | 2.2   | 20.4  | 20.4  | -    | 2.2   | 0.0   | 2.2  |
| United<br>Kingdom       | 147.3 | 115.0 | 32.3  | 94.2  | 94.2  | -    | 53.1  | 20.7  | 32.3 |
| United States           | 660.0 | 558.2 | 101.8 | 399.6 | 392.8 | 6.8  | 260.5 | 165.4 | 95.0 |
| Uruguay                 | 10.0  | 5.7   | 4.3   | 6.4   | 5.3   | 1.0  | 3.7   | 0.4   | 3.3  |



|            |       |       |   |      |      |   |       |       |   |
|------------|-------|-------|---|------|------|---|-------|-------|---|
| Uzbekistan | 51.1  | 51.1  | - | 22.0 | 22.0 | - | 29.1  | 29.1  | - |
| Vanuatu    | 0.3   | 0.3   | - | 0.1  | 0.1  | - | 0.3   | 0.3   | - |
| Venezuela  | 38.3  | 38.3  | - | 16.1 | 16.1 | - | 22.2  | 22.2  | - |
| Vietnam    | 157.9 | 157.9 | - | 50.6 | 50.6 | - | 107.3 | 107.3 | - |
| Yemen      | 32.6  | 32.6  | - | 0.4  | 0.4  | - | 32.2  | 32.2  | - |
| Zambia     | 18.0  | 18.0  | - | 0.8  | 0.8  | - | 17.2  | 17.2  | - |
| Zimbabwe   | 18.0  | 18.0  | - | 5.5  | 5.5  | - | 12.5  | 12.5  | - |

Abbreviation: AFR, African Region; AMR, Region of Americas; EMR, Eastern Mediterranean Region; EUR, European Region; SEAR, South-East Asia Region; WPR, Western Pacific Region.

## References

1. United States CDC. Who Is Eligible for a COVID-19 Vaccine Booster Shot? 2021. <https://www.cdc.gov/coronavirus/2019-ncov/vaccines/booster-shot.html> (accessed October 5 2021).
2. Gavi-COVAX. COVAX, the act-accelerator vaccines pillar. 2020. <https://www.gavi.org/sites/default/files/covid/COVAX-Pillar-background.pdf>.
3. Hunt BJ. Bleeding and Coagulopathies in Critical Care. *New England Journal of Medicine* 2014; **370**(9): 847-59.
4. Clark A, Jit M, Warren-Gash C, et al. Global, regional, and national estimates of the population at increased risk of severe COVID-19 due to underlying health conditions in 2020: a modelling study. *The Lancet Global health* 2020; **8**(8): e1003-e17.
5. Wang W, Wu Q, Yang J, et al. Global, regional, and national estimates of target population sizes for covid-19 vaccination: descriptive study. *BMJ (Clinical research ed)* 2020; **371**: m4704.
6. Global Health Data Exchange. Global Burden of Diseases, Risk Factors, and Injuries Study (GBD). 2019. <http://ghdx.healthdata.org/gbd-results-tool> (accessed October 13 2021).
7. World Health Organization. Estimated antiretroviral therapy coverage among people living with HIV (%). 2012. <https://www.who.int/data/gho/indicator-metadata-registry/imr-details/4477> (accessed October 13 2021).
8. Government of Canada. Estimates of HIV incidence, prevalence and Canada's progress on meeting the 90-90-90 HIV targets. 2018. <https://www.canada.ca/en/public-health/services/publications/diseases-conditions/summary-estimates-hiv-incidence-prevalence-canadas-progress-90-90-90.html> (accessed October 13 2021).
9. Adedinsewo DA, Wei SC, Robertson M, et al. Timing of antiretroviral therapy initiation in a nationally representative sample of HIV-infected adults receiving medical care in the United States. *AIDS patient care and STDs* 2014; **28**(12): 613-21.
10. Institute for Health Metrics and Evaluation (IHME). Global Burden of Disease Study 2019 (GBD 2019) Socio-Demographic Index (SDI) 1950–2019. <http://ghdx.healthdata.org/record/ihme-data/gbd-2019-socio-demographic-index-sdi-1950-2019>.
